# Supplementary material for: Synthesis and in vitro antiprotozoal evaluation of novel Knoevenagel hydroxychloroquine derivatives
Source: Royal Society of Chemistry journal article supplement (doi:10.1039/d4md00884g), 2025-01-01
Supplement: d4md00884g1.pdf [file d4md00884g1.pdf]

## Supporting Information

# Synthesis and *in vitro* antiprotozoal evaluation of novel Knoevenagel hydroxychloroquine derivatives

Priscila P. Dario<sup>1</sup>, Luis H. D. Yamashita<sup>2</sup>, Kahlil S. Salome<sup>3</sup>, Gabriel L. Kosinski<sup>1</sup>,  
Guilherme A. Justen<sup>1</sup>, Daniel da S. Rampon<sup>1</sup>, Danielle Lazarin-Bidoia<sup>2</sup>, Celso V.  
Nakamura<sup>2</sup>, Fernanda A. Rosa<sup>2</sup>, Marcelo G. Montes D'Oca<sup>1\*</sup>

<sup>1</sup> Chemistry Department, Kolbe Laboratory of Organic Synthesis, Federal University of Paraná – UFPR,  
Curitiba, PR, Brazil.

<sup>2</sup> Health Sciences Department, Laboratory of Technological Innovation in Pharmaceutical and Cosmetic  
Development (LITFaC), State University of Maringá - UEM, Maringá, PR, Brazil.

<sup>3</sup> Chemistry Department, NMR Laboratory, Federal University of Paraná - UFPR, Curitiba, PR, Brazil.

## Contents

|                                                                                                     |        |
|-----------------------------------------------------------------------------------------------------|--------|
| 1. Spectroscopic data of compounds <b>4</b> , <b>5</b> and Knoevenagel adducts <b>7a-o</b><br>..... | S02-22 |
| 2. Selected <sup>1</sup> H and <sup>13</sup> C NMR spectra.....                                     | S23-39 |
| 3. Selected HSQC and HMBC spectra .....                                                             | S40-55 |
| 4. <i>dse</i> l-HSQMBC-IPAP spectra.....                                                            | S56-63 |
| 5. High-Resolution Mass Spectrometry (HRMS) spectra.....                                            | S64-67 |
| 6. Fourier transform infrared spectroscopy (FT-IR) spectra.....                                     | S68-76 |

## Spectroscopic data of compounds **4**, **5** and Knoevenagel adducts **7a-o**

The compounds were obtained through purification in a chromatographic column using silica gel (0.063-0.2 mm / 70-230 mesh ASTM, Macherey-Nagel™) as the stationary phase and CH<sub>2</sub>Cl<sub>2</sub>:MeOH mixtures up to a ratio of 97:3 as eluent. After the fractions containing the desired product were dried in a vacuum pump and stored at -20 °C.

*2-((4-((7-chloroquinolin-4-yl)amino)pentyl)(ethyl)amino)ethan-1-ol* (**4**). Colorless transparent oil. Yield 97%. FT-IR (KBr,  $\nu_{\max}$  cm<sup>-1</sup>) 3320, 3110, 2967, 2870, 1612, 1577, 1454, 1380, 1332, 1150, 1049, 908, 877, 807, 758, 647, 602. <sup>1</sup>H NMR (400 MHz, CDCl<sub>3</sub>,  $\delta$  ppm) 1.01 (t, 3H,  $J = 7.1$  Hz, NCH<sub>2</sub>CH<sub>3</sub>), 1.31 (d, 3H,  $J = 6.4$  Hz, CHCH<sub>3</sub>), 1.51–1.79 (m, 4H, CH<sub>2</sub>CH<sub>2</sub>), 2.42–2.67 (m, 6H, CH<sub>2</sub>N), 3.56 (t, 2 H,  $J = 5.5$  Hz, NCH<sub>2</sub>CH<sub>2</sub>O), 3.65–3.77 (m, 1H, CHCH<sub>3</sub>) 5.02 (d, 1H,  $J = 7.5$  Hz, NH), 6.40 (d, 1H,  $J = 5.5$  Hz, CHQn), 7.33 (dd, 1H,  $J = 2.2, 9.0$  Hz, CHQn), 7.71 (d, 1H,  $J = 9.0$  Hz, CHQn), 7.94 (d, 1H,  $J = 2.1$  Hz, CHQn), 8.50 (d, 1H,  $J = 5.4$  Hz, CHQn). <sup>13</sup>C NMR (100 MHz, CDCl<sub>3</sub>,  $\delta$  ppm) 11.9 (NCH<sub>2</sub>CH<sub>3</sub>), 20.5 (CHCH<sub>3</sub>), 24.2 (CH<sub>2</sub>CH<sub>2</sub>), 34.5 (CH<sub>2</sub>CH<sub>2</sub>), 47.6 (NCH<sub>2</sub>CH<sub>3</sub>), 48.4 (CHCH<sub>3</sub>), 53.2 (CH<sub>2</sub>CH<sub>2</sub>CH<sub>2</sub>N), 55.0 (NCH<sub>2</sub>CH<sub>2</sub>O), 58.6 (NCH<sub>2</sub>CH<sub>2</sub>O), 99.3 (CHQn), 117.4 (CQn), 121.2 (CHQn), 125.2 (CHQn), 128.9 (CHQn), 134.9 (CQn), 149.1 (CQn), 149.5 (CQn), 152.1 (CHQn).

*2-((4-((7-chloroquinolin-4-yl)amino)pentyl)(ethyl)amino)ethyl 3-oxobutanoate* (**5**). Yellow viscous oil. Yield 77%. FT-IR (KBr,  $\nu_{\max}$  cm<sup>-1</sup>) 3406, 2971, 2868, 1741, 1716, 1575, 1454, 1378, 1332, 1148, 1078, 1033, 881, 809, 647. <sup>1</sup>H NMR (400 MHz, CDCl<sub>3</sub>,  $\delta$  ppm) 0.99 (t, 3H,  $J = 7.1$  Hz, NCH<sub>2</sub>CH<sub>3</sub>), 1.32 (d, 3H,  $J = 6.3$  Hz, CHCH<sub>3</sub>), 1.51–1.79 (m, 4H, CH<sub>2</sub>CH<sub>2</sub>), 2.23 (s, 3 H, COCH<sub>3</sub>), 2.48 (t, 2H,  $J = 6.8$  Hz, CH<sub>2</sub>CH<sub>2</sub>CH<sub>2</sub>N), 2.55

(q, 2H,  $J = 7.1$  Hz,  $\text{NCH}_2\text{CH}_3$ ), 2.69 (t, 2H,  $J = 6.0$  Hz,  $\text{NCH}_2\text{CH}_2\text{O}$ ), 3.43 (s, 2H,  $\text{COCH}_2$ ), 3.65 – 3.77 (m, 1H,  $\text{CHCH}_3$ ), 4.20 (t, 2H,  $J = 6.0$  Hz,  $\text{NCH}_2\text{CH}_2\text{O}$ ), 5.25 (d, 1H,  $J = 7.5$  Hz,  $\text{NH}$ ), 6.42 (d, 1H,  $J = 5.5$  Hz,  $\text{CHQn}$ ), 7.33 (dd, 1H,  $J = 2.1, 9.0$  Hz,  $\text{CHQn}$ ), 7.75 (d, 1H,  $J = 9.0$  Hz,  $\text{CHQn}$ ), 7.94 (d, 1H,  $J = 2.1$  Hz,  $\text{CHQn}$ ), 8.50 (d, 1H,  $J = 5.4$  Hz,  $\text{CHQn}$ ).  $^{13}\text{C}$  NMR (100 MHz,  $\text{CDCl}_3$ ,  $\delta$  ppm) 11.7 ( $\text{NCH}_2\text{CH}_3$ ), 20.3 ( $\text{CHCH}_3$ ), 24.1 ( $\text{CH}_2\text{CH}_2$ ), 30.3 ( $\text{COCH}_3$ ), 34.3 ( $\text{CH}_2\text{CH}_2$ ), 48.2 ( $\text{NCH}_2\text{CH}_3$ ), 48.4 ( $\text{CHCH}_3$ ), 50.2 ( $\text{COCH}_2$ ), 51.6 ( $\text{NCH}_2\text{CH}_2\text{O}$ ), 53.7 ( $\text{CH}_2\text{CH}_2\text{CH}_2\text{N}$ ), 63.4 ( $\text{NCH}_2\text{CH}_2\text{O}$ ), 99.3 ( $\text{CHQn}$ ), 117.4 ( $\text{CQn}$ ), 121.38 ( $\text{CHQn}$ ), 125.1 ( $\text{CHQn}$ ), 128.7 ( $\text{CHQn}$ ), 134.9 ( $\text{ClCQn}$ ), 149.2 ( $\text{CQnN}$ ), 149.4 ( $\text{CQnN}$ ), 152.0 ( $\text{CHQn}$ ), 167.1 ( $\text{C=O}$ ), 200.76 ( $\text{CH}_3\text{C=O}$ ). HRMS  $\text{C}_{22}\text{H}_{30}\text{ClN}_3\text{O}_3$   $[\text{M}+\text{H}]^+$  420.2049; found, 420.2059.

(*E/Z*)-2-((4-((7-chloroquinolin-4-yl)amino)pentyl)(ethyl)amino)ethyl 2-acetyl-5-methylhex-2-enoate (**7a**). Brown viscous oil. Yield 89%. FT-IR (KBr,  $\nu_{\text{max}}$   $\text{cm}^{-1}$ ) 3400, 2961, 2868, 1716, 1575, 1538, 1454, 1378, 1335, 1220, 1148, 1076, 1020, 908, 877, 811, 733, 647.  $^1\text{H}$  NMR (400 MHz,  $\text{CDCl}_3$ ,  $\delta$  ppm) 0.92 **isomer a/b** (t,  $J = 7.0$  Hz, 6H,  $\text{CH}_3\text{CHCH}_3$ ), 0.95-1.06 **isomer a/b** (m, 3H,  $\text{NCH}_2\text{CH}_3$ ), 1.31 **isomer a/b** (d,  $J = 6.1$  Hz, 3H,  $\text{CHCH}_3$ ), 1.39-1.86 **isomer a/b** (m, 4H,  $\text{CH}_2\text{CH}_2$ ), 1.39-1.86 **isomer a/b** (m, 1H,  $\text{CH}_3\text{CHCH}_3$ ), 2.06-2.27 **isomer a/b** (m, 2H,  $\text{C=CHCH}_2$ ), 2.30 **isomer a**, 2.36 **isomer b** (s, 3H,  $\text{COCH}_3$ ), 2.39-2.62 **isomer a/b** (m, 2H,  $\text{CH}_2\text{CH}_2\text{CH}_2\text{N}$ ), 2.39-2.62 **isomer a/b** (m, 2H,  $\text{NCH}_2\text{CH}_3$ ), 2.62-2.81 **isomer a/b** (m, 2H,  $\text{NCH}_2\text{CH}_2\text{O}$ ), 3.63-3.78 **isomer a/b** (m, 1H,  $\text{CHCH}_3$ ), 4.25 **isomer a** (t,  $J = 6.0$  Hz, 2H,  $\text{NCH}_2\text{CH}_2\text{O}$ ), 4.30 **isomer b** (td,  $J = 6.0, 2.0$  Hz, 2H,  $\text{NCH}_2\text{CH}_2\text{O}$ ), 5.32 **isomer a/b** (d,  $J = 6.4$  Hz, 1H,  $\text{NH}$ ), 6.42 **isomer a/b** (d,  $J = 4.0$  Hz, 1H,  $\text{CHQn}$ ), 6.82 **isomer a**, 6.92 **isomer b** (t,  $J = 7.8$  Hz, 1H,  $\text{C=CH}$ ), 7.32 **isomer a/b** (d,  $J = 8.6$  Hz, 1H,  $\text{CHQn}$ ), 7.78 **isomer a/b** (t,  $J = 8.7$  Hz, 1H,  $\text{CHQn}$ ), 7.94 **isomer a/b** (s, 1H,  $\text{CHQn}$ ), 8.50 **isomer a/b** (d,  $J = 4.5$  Hz, 1H,

$CHQ_n$ ).  $^{13}C$  NMR (100 MHz,  $CDCl_3$ ,  $\delta$  ppm) 11.7 **isomer a**, 11.9 **isomer b** ( $NCH_2CH_3$ ), 20.3 **isomer a/b** ( $CHCH_3$ ), 22.4 **isomer a/b** ( $CH_3CHCH_3$ ), 22.5 **isomer a/b** ( $CH_3CHCH_3$ ), 24.2 **isomer a**, 24.3 **isomer b** ( $CH_2CH_2$ ), 26.8 **isomer a** ( $COCH_3$ ), 28.2 **isomer a**, 28.3 **isomer b** ( $CH_3CHCH_3$ ), 31.4 **isomer b** ( $COCH_3$ ), 34.2 **isomer a**, 34.3 **isomer b** ( $CH_2CH_2$ ), 38.2 **isomer a**, 38.9 **isomer b** ( $C=CHCH_2$ ), 48.1 **isomer a/b** ( $NCH_2CH_3$ ), 48.5 **isomer a/b** ( $CHCH_3$ ), 51.6 **isomer a**, 51.7 **isomer b** ( $NCH_2CH_2O$ ), 53.6 **isomer a**, 53.7 **isomer b** ( $CH_2CH_2CH_2N$ ), 63.2 **isomer a/b** ( $NCH_2CH_2O$ ), 99.2 **isomer a/b** ( $CHQ_n$ ), 117.4 **isomer a/b** ( $CQ_n$ ), 121.5 **isomer a/b** ( $CHQ_n$ ), 125.1 **isomer a/b** ( $CHQ_n$ ), 128.6 **isomer a/b** ( $CHQ_n$ ), 134.9 **isomer a/b** ( $ClCQ_n$ ), 136.3 **isomer a**, 137.9 **isomer b** ( $C=CH$ ), 147.8 **isomer a/b** ( $C=CH$ ), 149.2 **isomer a/b** ( $CQ_nN$ ), 149.3 **isomer a/b** ( $CQ_nN$ ), 151.8 **isomer a/b** ( $CHQ_n$ ), 164.4 **isomer a**, 166.6 **isomer b** ( $C=O$ ), 195.4 **isomer a**, 201.5 **isomer b** ( $CH_3C=O$ ). HRMS  $C_{27}H_{38}ClN_3O_3$   $[M+H]^+$  488.2675; found, 488.2681.

*(E/Z)*-2-((4-((7-chloroquinolin-4-yl)amino)pentyl)(ethyl)amino)ethyl 2-benzylidene-3-oxobutanoate (**7b**). Yellow viscous oil. Yield 86%. FT-IR (KBr,  $\nu_{max}$   $cm^{-1}$ ) 3402, 2971, 2870, 1729, 1665, 1581, 1538, 1452, 1378, 1335, 1250, 1201, 1148, 1078, 1039, 908, 877, 809, 735, 692, 647.  $^1H$  NMR (600 MHz,  $CDCl_3$ ,  $\delta$  ppm) 0.95 **isomer a**, 1.01 **isomer b** (t,  $J = 7.1$  Hz, 3H,  $NCH_2CH_3$ ), 1.27 **isomer a**, 1.31 **isomer b** (d,  $J = 6.4$  Hz, 3H,  $CHCH_3$ ), 1.49-1.77 **isomer a/b** (m, 4H,  $CH_2CH_2$ ), 2.35 **isomer a**, 2.40 **isomer b** (s, 3H,  $COCH_3$ ), 2.46 **isomer a**, 2.50 **isomer b** (t,  $J = 6.9$  Hz, 2H,  $CH_2CH_2CH_2N$ ), 2.51 **isomer a**, 2.56 **isomer b** (q,  $J = 7.1$  Hz, 2H,  $NCH_2CH_3$ ), 2.70 **isomer a** (td,  $J = 6.0, 3.1$  Hz, 2H,  $NCH_2CH_2O$ ), 2.74 **isomer b** (t,  $J = 5.9$  Hz, 2H,  $NCH_2CH_2O$ ), 3.62-3.76 **isomer a/b** (m, 1H,  $CHCH_3$ ), 4.31 **isomer a** (t,  $J = 5.9$  Hz, 2H,  $NCH_2CH_2O$ ), 4.33 **isomer b** (td,  $J = 6.0, 2.7$  Hz, 2H,  $NCH_2CH_2O$ ), 5.17 **isomer a**, 5.31 **isomer b** (d,  $J = 7.5$  Hz, 1H,



NH), 6.38 **isomer a**, 6.41 **isomer b** (d,  $J = 5.6$  Hz, 1H, CHQn), 7.26 **isomer a**, 7.28 **isomer b** (dd,  $J = 8.9, 2.2$  Hz, 1H, CHQn), 7.31-7.46 **isomer a/b** (m, 5H, CHAr), 7.51 **isomer a**, 7.67 **isomer b** (s, 1H, C=CH), 7.68 **isomer a**, 7.76 **isomer b** (d,  $J = 9.0$  Hz, 1H, CHQn), 7.92 **isomer a**, 7.93 **isomer b** (d,  $J = 2.2$  Hz, 1H, CHQn), 8.48 **isomer a**, 8.49 **isomer b** (d,  $J = 1.9$  Hz, 1H, CHQn).  $^{13}\text{C}$  NMR (100 MHz,  $\text{CDCl}_3$ ,  $\delta$  ppm) 11.6 **isomer a**, 12.0 **isomer b** (NCH<sub>2</sub>CH<sub>3</sub>), 20.2 **isomer a**, 20.3 **isomer b** (CHCH<sub>3</sub>), 24.1 **isomer a**, 24.4 **isomer b** (CH<sub>2</sub>CH<sub>2</sub>), 26.5 **isomer a**, 31.4 **isomer b** (COCH<sub>3</sub>), 34.3 **isomer a**, 34.4 **isomer b** (CH<sub>2</sub>CH<sub>2</sub>), 48.1 **isomer a**, 48.2 **isomer b** (NCH<sub>2</sub>CH<sub>3</sub>), 48.4 **isomer a**, 48.5 **isomer b** (CHCH<sub>3</sub>), 51.5 **isomer a**, 51.6 **isomer b** (NCH<sub>2</sub>CH<sub>2</sub>O), 53.5 **isomer a**, 53.8 **isomer b** (CH<sub>2</sub>CH<sub>2</sub>CH<sub>2</sub>N), 63.73 **isomer a**, 63.77 **isomer b** (NCH<sub>2</sub>CH<sub>2</sub>O) 99.2 **isomer a**, 99.3 **isomer b** (CHQn), 117.4 **isomer a**, 117.5 **isomer b** (CQn), 121.3 **isomer a**, 121.4 **isomer b** (CHQn), 125.0 **isomer a**, 125.1 **isomer b** (CHQn), 128.7 **isomer a**, 128.8 **isomer b** (CHQn), 129.0 **isomer a**, 129.1 **isomer b** (2CHAr), 129.7 **isomer a**, 129.8 **isomer b** (2CHAr), 130.7 **isomer a**, 130.9 **isomer b** (CHAr), 132.8 **isomer a**, 132.9 **isomer b** (CAr), 133.9 **isomer a**, 134.7 **isomer b** (C=CH), 134.8 **isomer a**, 134.9 **isomer b** (ClCQn), 141.0 **isomer a**, 141.6 **isomer b** (C=CH), 149.2 **isomer a**, 149.3 **isomer b** (CQnN), 149.4 **isomer a**, 149.5 **isomer b** (CQnN), 152.1 **isomer a/b** (CHQn), 164.5 **isomer a**, 167.9 **isomer b** (C=O), 195.1 **isomer a**, 203.7 **isomer b** (CH<sub>3</sub>C=O). HRMS C<sub>29</sub>H<sub>34</sub>ClN<sub>3</sub>O<sub>3</sub> [M+H]<sup>+</sup> 508.2362; found, 508.2345.

(*E/Z*)-2-((4-((7-chloroquinolin-4-yl)amino)pentyl)(ethyl)amino)ethyl 2-(4-(dimethylamino)benzylidene)-3-oxobutanoate (**7c**). Orange viscous oil. Yield 47%. FT-IR (KBr,  $\nu_{\text{max}}$  cm<sup>-1</sup>) 3394, 2969, 2811, 1716, 1649, 1575, 1528, 1450, 1371, 1328, 1263, 1218, 1166, 1064, 1039, 977, 947, 908, 879, 813, 762, 733, 647, 532.  $^1\text{H}$  NMR (400

MHz, CDCl<sub>3</sub>,  $\delta$  ppm) 0.98 **isomer a**, 1.01 **isomer b** (t,  $J = 7.1$  Hz, 3H, NCH<sub>2</sub>CH<sub>3</sub>), 1.26 **isomer a**, 1.30 **isomer b** (d,  $J = 6.3$  Hz, 3H, CHCH<sub>3</sub>), 1.46-1.79 **isomer a/b** (m, 4H, CH<sub>2</sub>CH<sub>2</sub>), 2.35 **isomer a**, 2.41 **isomer b** (s, 3H, COCH<sub>3</sub>), 2.45-2.52 **isomer a/b** (m, 2H, CH<sub>2</sub>CH<sub>2</sub>CH<sub>2</sub>N), 2.55 **isomer a/b** (q,  $J = 7.1$  Hz, 2H, NCH<sub>2</sub>CH<sub>3</sub>), 2.73 **isomer a** (t,  $J = 5.8$  Hz, 2H, NCH<sub>2</sub>CH<sub>2</sub>O), 2.77 **isomer b** (td,  $J = 6.0, 3.7$  Hz, 2H, NCH<sub>2</sub>CH<sub>2</sub>O), 2.99 **isomer a**, 3.01 **isomer b** (s, 6H, ArCN(CH<sub>3</sub>)<sub>2</sub>), 3.59-3.77 **isomer a/b** (m, 1H, CHCH<sub>3</sub>), 4.28 **isomer a** (td,  $J = 5.8, 3.0$  Hz, 2H, NCH<sub>2</sub>CH<sub>2</sub>O), 4.38 **isomer b** (t,  $J = 6.0$  Hz, 2H, NCH<sub>2</sub>CH<sub>2</sub>O), 5.36 **isomer a**, 5.49 **isomer b** (d,  $J = 7.5$  Hz, 1H, NH), 6.37 **isomer a**, 6.40 **isomer b** (d,  $J = 5.5$  Hz, 1H, CHQn), 6.57 **isomer a**, 6.60 **isomer b** (d,  $J = 2.0$  Hz, 2H, CHAr), 7.20 **isomer a**, 7.24 **isomer b** (dd,  $J = 9.0, 2.0$  Hz, 1H, CHQn), 7.26 **isomer a/b** (d,  $J = 7.0$  Hz, 1H, CHAr), 7.34 **isomer a/b** (d,  $J = 9.0$  Hz, 1H, CHAr), 7.41 **isomer a**, 7.57 **isomer b** (s, 1H, C=CH), 7.73 **isomer a**, 7.81 **isomer b** (d,  $J = 9.0$  Hz, 1H, CHQn), 7.88-7.92 **isomer a/b** (m, 1H, CHQn), 8.46 **isomer a**, 8.48 **isomer b** (d,  $J = 2.4$  Hz, 1H, CHQn). <sup>13</sup>C NMR (100 MHz, CDCl<sub>3</sub>,  $\delta$  ppm) 11.6 **isomer a**, 11.9 **isomer b** (NCH<sub>2</sub>CH<sub>3</sub>), 20.1 **isomer a**, 20.2 **isomer b** (CHCH<sub>3</sub>), 24.1 **isomer a**, 24.3 **isomer b** (CH<sub>2</sub>CH<sub>2</sub>), 26.2 **isomer a**, 31.5 **isomer b** (COCH<sub>3</sub>), 34.3 **isomer a/b** (CH<sub>2</sub>CH<sub>2</sub>), 39.99 **isomer a/b** ArCN(CH<sub>3</sub>)<sub>2</sub>, 48.1 **isomer a**, 48.2 **isomer b** (NCH<sub>2</sub>CH<sub>3</sub>), 48.4 **isomer a**, 48.5 **isomer b** (CHCH<sub>3</sub>), 51.5 **isomer a**, 51.6 **isomer b** (NCH<sub>2</sub>CH<sub>2</sub>O), 53.5 **isomer a**, 53.7 **isomer b** (CH<sub>2</sub>CH<sub>2</sub>CH<sub>2</sub>N), 63.1 **isomer a**, 63.5 **isomer b** (NCH<sub>2</sub>CH<sub>2</sub>O), 99.2 **isomer a/b** (CHQn), 111.7 **isomer a/b** (2CHAR), 117.4 **isomer a**, 117.5 **isomer b** (CQn), 119.7 **isomer a**, 120.0 **isomer b** (CAr), 121.6 **isomer a**, 121.7 **isomer b** (CHQn), 125.0 **isomer a/b** (CHQn), 127.6 **isomer a** (C=CH), 128.5 **isomer a/b** (CHQn), 129.1 **isomer b** (C=CH), 132.2 **isomer a**, 132.3 **isomer b** (2CHAR), 134.7 **isomer a**, 134.8 **isomer b** (ClCQn), 141.9 **isomer a**, 142.6 **isomer b** (C=CH), 149.3 **isomer a/b** (CQnN), 149.4 **isomer a/b** (CQnN), 151.9 **isomer a/b** (CHQn), 152.2

**isomer a/b** (ArCN(CH<sub>3</sub>)<sub>2</sub>), 165.3 **isomer a**, 169.2 **isomer b** (C=O), 195.1 **isomer a**, 205.2 **isomer b** (CH<sub>3</sub>C=O). HRMS C<sub>31</sub>H<sub>39</sub>ClN<sub>4</sub>O<sub>3</sub> [M+H]<sup>+</sup> 551.2784; found, 551.2783.

*(E/Z)-2-((4-((7-chloroquinolin-4-yl)amino)pentyl)(ethyl)amino)ethyl 2-(4-methoxybenzylidene)-3-oxobutanoate (7d)*. Yellow viscous oil. Yield 75%. FT-IR (KBr,  $\nu_{\max}$  cm<sup>-1</sup>) 3402, 2969, 2839, 1718, 1655, 1601, 1577, 1513, 1454, 1425, 1378, 1332, 1259, 1203, 1174, 1078, 1029, 908, 879, 829, 758, 647, 540. <sup>1</sup>H NMR (600 MHz, CDCl<sub>3</sub>,  $\delta$  ppm) 0.97 **isomer a**, 1.01 **isomer b** (t,  $J$  = 7.1 Hz, 3H, NCH<sub>2</sub>CH<sub>3</sub>), 1.26 **isomer a**, 1.31 **isomer b** (d,  $J$  = 6.4 Hz, 3H, CHCH<sub>3</sub>), 1.49-1.78 **isomer a/b** (m, 4H, CH<sub>2</sub>CH<sub>2</sub>), 2.38 **isomer a/b** (s, 3H, COCH<sub>3</sub>), 2.47 **isomer a**, 2.49 **isomer b** (t,  $J$  = 6.5 Hz, 2H, CH<sub>2</sub>CH<sub>2</sub>CH<sub>2</sub>N), 2.54 **isomer a**, 2.55 **isomer b** (q,  $J$  = 7.1 Hz, 2H, NCH<sub>2</sub>CH<sub>3</sub>), 2.70-2.79 **isomer a/b** (m, 2H, NCH<sub>2</sub>CH<sub>2</sub>O), 3.61-3.75 **isomer a/b** (m, 1H, CHCH<sub>3</sub>), 3.81 **isomer a**, 3.82 **isomer b** (s, 3H, ArOCH<sub>3</sub>), 4.29 **isomer a** (t,  $J$  = 6.0 Hz, 2H, NCH<sub>2</sub>CH<sub>2</sub>O), 4.36 **isomer b** (td,  $J$  = 6.0, 1.0 Hz, 2H, NCH<sub>2</sub>CH<sub>2</sub>O), 5.27 **isomer a**, 5.39 **isomer b** (d,  $J$  = 7.5 Hz, 1H, NH), 6.38 **isomer a**, 6.41 **isomer b** (d,  $J$  = 5.5 Hz, 1H, CHQn), 6.85 **isomer a**, 6.87 **isomer b** (d,  $J$  = 3.4 Hz, 2H, CHAr), 7.23 **isomer a**, 7.26 **isomer b** (dd,  $J$  = 2.2, 8.9 Hz, 1H, CHQn), 7.31 **isomer a**, 7.40 **isomer b** (d,  $J$  = 8.8 Hz, 2H, CHAr), 7.44 **isomer a**, 7.60 **isomer b** (s, 1H, C=CH), 7.71 **isomer a**, 7.78 **isomer b** (d,  $J$  = 9.0 Hz, 1H, CHQn), 7.91 **isomer a**, 7.92 **isomer b** (d,  $J$  = 2.3 Hz, 1H, CHQn), 8.47 **isomer a**, 8.48 **isomer b** (d,  $J$  = 4.0 Hz, 1H, CHQn). <sup>13</sup>C NMR (150 MHz, CDCl<sub>3</sub>,  $\delta$  ppm)  $\delta$  11.5 **isomer a**, 11.9 **isomer b** (NCH<sub>2</sub>CH<sub>3</sub>), 20.2 **isomer a/b** (CHCH<sub>3</sub>), 24.1 **isomer a**, 24.3 **isomer b** (CH<sub>2</sub>CH<sub>2</sub>), 26.4 **isomer a**, 31.4 **isomer b** (COCH<sub>3</sub>), 34.2 **isomer a**, 34.3 **isomer b** (CH<sub>2</sub>CH<sub>2</sub>), 48.1 **isomer a/b** (NCH<sub>2</sub>CH<sub>3</sub>), 48.4 **isomer a**, 48.5 **isomer b** (CHCH<sub>3</sub>), 51.5 **isomer a**, 51.6 **isomer b** (NCH<sub>2</sub>CH<sub>2</sub>O), 53.5 **isomer a**, 53.7 **isomer b** (CH<sub>2</sub>CH<sub>2</sub>CH<sub>2</sub>N), 55.5 **isomer a/b** (ArOCH<sub>3</sub>), 63.5 **isomer a**, 63.7 **isomer b**

(NCH<sub>2</sub>CH<sub>2</sub>O), 99.2 **isomer a/b** (CHQn), 114.5 **isomer a/b** (2CHAr), 117.3 **isomer a**, 117.4 **isomer b** (CQn), 121.5 **isomer a**, 121.6 **isomer b** (CHQn), 125.0 **isomer a**, 125.1 **isomer b** (CHQn), 125.2 **isomer a**, 125.3 **isomer b** (CAr), 128.6 **isomer a/b** (CHQn), 131.2 **isomer a** (C=CH), 131.8 **isomer a**, 131.9 **isomer b** (CHAr), 132.3 **isomer b** (C=CH), 134.7 **isomer a**, 134.8 **isomer b** (ClCQn), 140.8 **isomer a**, 141.4 **isomer b** (C=CH), 149.2 **isomer a/b** (CQnN), 149.3 **isomer a/b** (CQnN), 151.9 **isomer a/b** (CHQn), 161.7 **isomer a**, 161.9 **isomer b** (ArCOCH<sub>3</sub>), 164.8 **isomer a**, 168.3 **isomer b** (C=O), 195.1 **isomer a**, 204.3 **isomer b** (CH<sub>3</sub>C=O). HRMS C<sub>30</sub>H<sub>36</sub>ClN<sub>3</sub>O<sub>4</sub> [M+H]<sup>+</sup> 538.2467; found, 538.2478.

*(E/Z)-2-((4-((7-chloroquinolin-4-yl)amino)pentyl)(ethyl)amino)ethyl 2-(3,4-dimethoxybenzylidene)-3-oxobutanoate (7e)*. Yellow viscous oil. Yield 64%. FT-IR (KBr,  $\nu_{\max}$  cm<sup>-1</sup>) 3400, 2967, 2837, 1723, 1659, 1575, 1517, 1454, 1378, 1335, 1252, 1226, 1146, 1078, 1022, 908, 852, 809, 731, 647, 600, 550. <sup>1</sup>H NMR (400 MHz, CDCl<sub>3</sub>,  $\delta$  ppm) 0.96 **isomer a**, 1.01 **isomer b** (t, *J* = 7.1 Hz, 3H, NCH<sub>2</sub>CH<sub>3</sub>), 1.26 **isomer a**, 1.31 **isomer b** (d, *J* = 6.2 Hz, 3H, CHCH<sub>3</sub>), 1.45-1.81 **isomer a/b** (m, 4H, CH<sub>2</sub>CH<sub>2</sub>), 2.38 **isomer a/b** (s, 3H, COCH<sub>3</sub>), 2.42-2.61 **isomer a/b** (m, 4H, CH<sub>2</sub>CH<sub>2</sub>CH<sub>2</sub>N and NCH<sub>2</sub>CH<sub>3</sub>), 2.74 **isomer a/b** (t, *J* = 5.8 Hz, 2H, NCH<sub>2</sub>CH<sub>2</sub>O), 3.60-3.78 **isomer a/b** (m, 1H, CHCH<sub>3</sub>), 3.82 **isomer a**, 3.85 **isomer b** (s, 3H, ArOCH<sub>3</sub>), 3.90 **isomer a/b** (s, 3H, ArOCH<sub>3</sub>), 4.30 **isomer a** (t, *J* = 5.9 Hz, 2H, NCH<sub>2</sub>CH<sub>2</sub>O), 4.32-4.41 **isomer b** (m, 2H, NCH<sub>2</sub>CH<sub>2</sub>O), 5.29 **isomer a**, 5.36 **isomer b** (d, *J* = 7.0 Hz, 1H, NH), 6.39 **isomer a**, 6.42 **isomer b** (d, *J* = 5.5 Hz, 1H, CHQn), 6.82 **isomer a**, 6.84 **isomer b** (d, *J* = 9.0 Hz, 1H, CHAr), 6.89 **isomer a** (s, 1H, CHAr), 6.98 **isomer a** (d, *J* = 8.5 Hz, 1H, CHAr), 7.00 **isomer b** (s, 1H, CHAr), 7.07 **isomer b** (d, *J* = 8.5 Hz, 1H CHAr), 7.22-7.29 **isomer a/b** (m, 1H, CHQn), 7.44 **isomer a**, 7.59 **isomer b** (s, 1H, C=CH), 7.74 **isomer**

**a**, 7.78 **isomer b** (d,  $J = 9.0$  Hz, 1H, CHQn), 7.88-7.96 **isomer a/b** (m, 1H, CHQn), 8.49 **isomer a/b** (d,  $J = 5.3$  Hz, 1H, CHQn).  $^{13}\text{C}$  NMR (100 MHz,  $\text{CDCl}_3$ ,  $\delta$  ppm)  $\delta$  11.5 **isomer a**, 11.9 **isomer b** ( $\text{NCH}_2\text{CH}_3$ ), 20.1 **isomer a**, 20.2 **isomer b** ( $\text{CHCH}_3$ ), 24.0 **isomer a**, 24.3 **isomer b** ( $\text{CH}_2\text{CH}_2$ ), 26.3 **isomer a**, 31.5 **isomer b** ( $\text{COCH}_3$ ), 34.3 **isomer a/b** ( $\text{CH}_2\text{CH}_2$ ), 48.1 **isomer a/b** ( $\text{NCH}_2\text{CH}_3$ ), 48.3 **isomer a**, 48.4 **isomer b** ( $\text{CHCH}_3$ ), 51.5 **isomer a**, 51.6 **isomer b** ( $\text{NCH}_2\text{CH}_2\text{O}$ ), 53.5 **isomer a**, 53.7 **isomer b** ( $\text{CH}_2\text{CH}_2\text{CH}_2\text{N}$ ), 55.9 **isomer a/b** ( $\text{ArOCH}_3$ ), 56.0 **isomer a/b** ( $\text{ArOCH}_3$ ), 63.5 **isomer a**, 63.9 **isomer b** ( $\text{NCH}_2\text{CH}_2\text{O}$ ), 99.2 **isomer a/b** (CHQn), 111.1 **isomer a/b** (CHAr), 111.9 **isomer a**, 112.2 **isomer b** (CHAr), 117.3 **isomer a**, 117.4 **isomer b** (CQn), 121.5 **isomer a/b** (CHQn), 124.2 **isomer a**, 124.6 **isomer b** (CHAr), 125.0 **isomer a/b** (CHQn), 125.5 **isomer a/b** (CAr), 128.7 **isomer a/b** (CHQn), 131.5 **isomer a**, 132.6 **isomer b** ( $\text{C}=\text{CH}$ ), 134.7 **isomer a/b** (ClCQn), 140.9 **isomer a**, 141.5 **isomer b** ( $\text{C}=\text{CH}$ ), 149.1 **isomer a/b** (CQnN), 149.2 **isomer a/b** (CQnN), 149.4 **isomer a/b** ( $\text{ArCOCH}_3$ ), 151.4 **isomer a**, 151.6 **isomer b** ( $\text{ArCOCH}_3$ ), 152.0 **isomer a/b** (CHQn), 164.7 **isomer a**, 168.3 **isomer b** ( $\text{C}=\text{O}$ ), 195.0 **isomer a**, 204.2 **isomer b** ( $\text{CH}_3\text{C}=\text{O}$ ). HRMS  $\text{C}_{31}\text{H}_{38}\text{ClN}_3\text{O}_5$   $[\text{M}+\text{H}]^+$  568.2573; found, 568.2621.

(*E/Z*)-2-((4-((7-chloroquinolin-4-yl)amino)pentyl)(ethyl)amino)ethyl 2-(4-fluorobenzylidene)-3-oxobutanoate (**7f**). Yellow viscous oil. Yield 73%. FT-IR (KBr,  $\nu_{\text{max}}$   $\text{cm}^{-1}$ ) 3402, 2969, 2870, 1729, 1698, 1665, 1575, 1509, 1454, 1378, 1332, 1240, 1199, 1162, 1078, 1039, 905, 879, 834, 758, 647, 522.  $^1\text{H}$  NMR (600 MHz,  $\text{CDCl}_3$ ,  $\delta$  ppm) 0.96 **isomer a**, 1.01 **isomer b** (t,  $J = 7.1$  Hz, 3H,  $\text{NCH}_2\text{CH}_3$ ), 1.27 **isomer a**, 1.31 **isomer b** (d,  $J = 6.4$  Hz, 3H,  $\text{CHCH}_3$ ), 1.48-1.77 **isomer a/b** (m, 4H,  $\text{CH}_2\text{CH}_2$ ), 2.35 **isomer a**, 2.39 **isomer b** (s, 3H,  $\text{COCH}_3$ ), 2.46 **isomer a**, 2.49 **isomer b** (t,  $J = 6.6$  Hz, 2H,  $\text{CH}_2\text{CH}_2\text{CH}_2\text{N}$ ), 2.53 **isomer a**, 2.56 **isomer b** (q,  $J = 7.1$  Hz, 2H,  $\text{NCH}_2\text{CH}_3$ ), 2.71

**isomer a** (td,  $J = 6.0, 2.0$  Hz, 2H,  $\text{NCH}_2\text{CH}_2\text{O}$ ), 2.74 **isomer b** (t,  $J = 6.0$  Hz, 2H,  $\text{NCH}_2\text{CH}_2\text{O}$ ), 3.63-3.76 **isomer a/b** (m, 1H,  $\text{CHCH}_3$ ), 4.30 **isomer a**, 4.33 **isomer b** (t,  $J = 6.0$  Hz, 2H,  $\text{NCH}_2\text{CH}_2\text{O}$ ), 5.16-5.25 **isomer a**, 5.25-5.34 **isomer b** (m, 1H,  $\text{NH}$ ), 6.39 **isomer a**, 6.42 **isomer b** (d,  $J = 5.5$  Hz, 1H,  $\text{CHQn}$ ), 7.04 **isomer a/b** (t,  $J = 8.5$  Hz, 2H,  $\text{CHAr}$ ), 7.23-7.30 **isomer a/b** (m, 1H,  $\text{CHQn}$ ), 7.34 **isomer a**, 7.36 **isomer b** (d,  $J = 5.3$  Hz, 1H,  $\text{CHAr}$ ), 7.43 **isomer a**, 7.44 **isomer b** (d,  $J = 5.3$  Hz, 1H,  $\text{CHAr}$ ), 7.45 **isomer a**, 7.60 **isomer b** (s, 1H,  $\text{C=CH}$ ), 7.68-7.73 **isomer a**, 7.74-7.81 **isomer b** (m, 1H,  $\text{CHQn}$ ), 7.91 **isomer a**, 7.92 **isomer b** (d,  $J = 2.2$  Hz, 1H,  $\text{CHQn}$ ), 8.48 **isomer a**, 8.49 **isomer b** (d,  $J = 4.5$  Hz, 1H,  $\text{CHQn}$ ).  $^{13}\text{C}$  NMR (100 MHz,  $\text{CDCl}_3$ ,  $\delta$  ppm) 11.5 **isomer a**, 11.8 **isomer b** ( $\text{NCH}_2\text{CH}_3$ ), 20.1 **isomer a**, 20.2 **isomer b** ( $\text{CHCH}_3$ ), 23.9 **isomer a**, 24.2 **isomer b** ( $\text{CH}_2\text{CH}_2$ ), 26.4 **isomer a**, 31.3 **isomer b** ( $\text{COCH}_3$ ), 34.1 **isomer a**, 34.2 **isomer b** ( $\text{CH}_2\text{CH}_2$ ), 47.9 **isomer a**, 48.0 **isomer b** ( $\text{NCH}_2\text{CH}_3$ ), 48.3 **isomer a**, 48.4 **isomer b** ( $\text{CHCH}_3$ ), 51.4 **isomer a**, 51.5 **isomer b** ( $\text{NCH}_2\text{CH}_2\text{O}$ ), 53.4 **isomer a**, 53.6 **isomer b** ( $\text{CH}_2\text{CH}_2\text{CH}_2\text{N}$ ), 63.6 **isomer a**, 63.7 **isomer b** ( $\text{NCH}_2\text{CH}_2\text{O}$ ), 99.1 **isomer a/b** ( $\text{CHQn}$ ), 115.9 **isomer a**, 116.0 **isomer b** ( $\text{CHAr}$ ), 116.2 **isomer a**, 116.3 **isomer b** ( $\text{CHAr}$ ), 117.3 **isomer a**, 117.4 **isomer b** ( $\text{CQn}$ ), 121.4 **isomer a**, 121.5 **isomer b** ( $\text{CHQn}$ ), 124.8 **isomer a**, 124.9 **isomer b** ( $\text{CHQn}$ ), 128.5 **isomer a/b** ( $\text{CHQn}$ ), 128.9 **isomer a**, 129.0 **isomer b** (d,  $J = 3.3$  Hz,  $\text{CAr}$ ), 131.7 **isomer a/b** ( $\text{CHAr}$ ), 131.8 **isomer a/b** ( $\text{CHAr}$ ), 133.5 **isomer a**, 134.3 **isomer b** ( $\text{C=CH}$ ), 134.7 **isomer a/b** ( $\text{ClCQn}$ ), 139.5 **isomer a**, 140.1 **isomer b** ( $\text{C=CH}$ ), 149.1 **isomer a**, 149.2 **isomer b** ( $\text{CQnN}$ ), 149.3 **isomer a/b** ( $\text{CQnN}$ ), 151.9 **isomer a/b** ( $\text{CHQn}$ ), 162.6 **isomer a** (d,  $J = 12.7$  Hz,  $\text{FCAr}$ ), 164.3 **isomer a** ( $\text{C=O}$ ), 165.1 **isomer b** (d,  $J = 12.7$  Hz,  $\text{FCAr}$ ), 167.6 **isomer b** ( $\text{C=O}$ ), 194.8 **isomer a**, 203.4 **isomer b** ( $\text{CH}_3\text{C=O}$ ). HRMS  $\text{C}_{29}\text{H}_{33}\text{ClFN}_3\text{O}_3$   $[\text{M}+\text{H}]^+$  526.2267; found, 526.2259.

(*E/Z*)-2-((4-((7-chloroquinolin-4-yl)amino)pentyl)(ethyl)amino)ethyl 2-(2-chlorobenzylidene)-3-oxobutanoate (**7g**). Yellow viscous oil. Yield 78%. FT-IR (KBr,  $\nu_{\max}$   $\text{cm}^{-1}$ ) 3406, 2969, 2868, 1727, 1702, 1577, 1538, 1452, 1378, 1335, 1244, 1201, 1131, 1043, 953, 877, 809, 756, 694.  $^1\text{H}$  NMR (600 MHz,  $\text{CDCl}_3$ ,  $\delta$  ppm) 0.93 **isomer a**, 1.02 **isomer b** (t,  $J = 7.1$  Hz, 3H,  $\text{NCH}_2\text{CH}_3$ ), 1.29 **isomer a**, 1.31 **isomer b** (d,  $J = 6.3$  Hz, 3H,  $\text{CHCH}_3$ ), 1.45-1.79 **isomer a/b** (m, 4H,  $\text{CH}_2\text{CH}_2$ ), 2.23 **isomer a** (s, 3H,  $\text{COCH}_3$ ), 2.41 **isomer a** (t,  $J = 6.9$  Hz, 2H,  $\text{CH}_2\text{CH}_2\text{CH}_2\text{N}$ ), 2.45 **isomer b** (s, 3H,  $\text{COCH}_3$ ), 2.46 **isomer a** (q,  $J = 7.1$  Hz, 2H,  $\text{NCH}_2\text{CH}_3$ ), 2.51 **isomer b** (t,  $J = 6.9$  Hz, 2H,  $\text{CH}_2\text{CH}_2\text{CH}_2\text{N}$ ), 2.57 **isomer b** (q,  $J = 7.1$  Hz, 2H,  $\text{NCH}_2\text{CH}_3$ ), 2.61 **isomer a** (td,  $J = 6.0, 3.6$  Hz, 2H,  $\text{NCH}_2\text{CH}_2\text{O}$ ), 2.76 **isomer b** (t,  $J = 6.0$  Hz, 2H,  $\text{NCH}_2\text{CH}_2\text{O}$ ), 3.64-3.75 **isomer a/b** (m, 1H,  $\text{CHCH}_3$ ), 4.23 **isomer a** (td,  $J = 6.0, 2.0$  Hz, 2H,  $\text{NCH}_2\text{CH}_2\text{O}$ ), 4.32 **isomer b** (td,  $J = 6.0, 1.0$  Hz, 2H,  $\text{NCH}_2\text{CH}_2\text{O}$ ), 5.13 **isomer a**, 5.23 **isomer b** (d,  $J = 7.0$  Hz, 1H,  $\text{NH}$ ), 6.40 **isomer a**, 6.41 **isomer b** (d,  $J = 5.5$  Hz, 1H,  $\text{CHQn}$ ), 7.19-7.24 **isomer a/b** (m, 1H,  $\text{CHAr}$ ), 7.24-7.39 **isomer a/b** (m, 3H,  $\text{CHAr}$ ,  $\text{CHQn}$ ), 7.39-7.48 **isomer a/b** (m, 1H,  $\text{CHAr}$ ), 7.68 **isomer a**, 7.74 **isomer b** (d,  $J = 9.0$  Hz, 1H,  $\text{CHQn}$ ), 7.84 **isomer a** (s, 1H,  $\text{C=CH}$ ), 7.92 **isomer a**, 7.94 **isomer b** (d,  $J = 2.0$  Hz, 1H,  $\text{CHQn}$ ), 7.95 **isomer b** (s, 1H,  $\text{C=CH}$ ), 8.49 **isomer a**, 8.50 **isomer b** (d,  $J = 3.7$  Hz, 1H,  $\text{CHQn}$ ).  $^{13}\text{C}$  NMR (100 MHz,  $\text{CDCl}_3$ ,  $\delta$  ppm) 11.5 **isomer a**, 11.8 **isomer b** ( $\text{NCH}_2\text{CH}_3$ ), 20.1 **isomer a/b** ( $\text{CHCH}_3$ ), 24.0 **isomer a**, 24.2 **isomer b** ( $\text{CH}_2\text{CH}_2$ ), 26.6 **isomer a**, 31.3 **isomer b** ( $\text{COCH}_3$ ), 34.1 **isomer a/b** ( $\text{CH}_2\text{CH}_2$ ), 47.9 **isomer a**, 48.0 **isomer b** ( $\text{NCH}_2\text{CH}_3$ ), 48.2 **isomer a**, 48.3 **isomer b** ( $\text{CHCH}_3$ ), 51.1 **isomer a**, 51.4 **isomer b** ( $\text{NCH}_2\text{CH}_2\text{O}$ ), 53.4 **isomer a**, 53.6 **isomer b** ( $\text{CH}_2\text{CH}_2\text{CH}_2\text{N}$ ), 63.6 **isomer a**, 63.7 **isomer b** ( $\text{NCH}_2\text{CH}_2\text{O}$ ), 99.1 **isomer a/b** ( $\text{CHQn}$ ), 117.3 **isomer a/b** ( $\text{CQn}$ ), 121.5 **isomer a/b** ( $\text{CHQn}$ ), 124.9 **isomer a/b** ( $\text{CHQn}$ ), 126.9 **isomer a**, 127.0 **isomer b** ( $\text{CHAr}$ ), 128.3 **isomer a/b** ( $\text{CHQn}$ ), 129.2 **isomer a**, 129.8 **isomer b** ( $\text{CHAr}$ ), 129.9

**isomer a/b** (CHAr), 131.3 **isomer a**, 131.4 **isomer b** (CHAr), 131.5, 131.8, 134.4, 134.6 (3C), 136.0, 136.5 **isomer a/b** (C=CH, ClCQn, ClCAr, CAr), 137.7 **isomer a**, 138.4 **isomer b** (C=CH), 149.1 **isomer a/b** (2CQnN), 151.7 **isomer a/b** (CHQn), 164.0 **isomer a**, 166.7 **isomer b** (C=O), 194.9 **isomer a**, 202.2 **isomer b** (CH<sub>3</sub>C=O). HRMS C<sub>29</sub>H<sub>33</sub>Cl<sub>2</sub>N<sub>3</sub>O<sub>3</sub> [M+H]<sup>+</sup> 542.1972; found, 542.1960.

(*E/Z*)-2-((4-((7-chloroquinolin-4-yl)amino)pentyl)(ethyl)amino)ethyl 2-(3-chlorobenzylidene)-3-oxobutanoate (**7h**). Yellow viscous oil. Yield 76%. FT-IR (KBr,  $\nu_{\max}$  cm<sup>-1</sup>) 3408, 2969, 2868, 1729, 1698, 1667, 1575, 1536, 1454, 1378, 1332, 1246, 1199, 1150, 1082, 1039, 901, 879, 807, 786, 758, 686, 645, 546. <sup>1</sup>H NMR (600 MHz, CDCl<sub>3</sub>,  $\delta$  ppm) 0.96 **isomer a**, 1.01 **isomer b** (t, *J* = 7.1 Hz, 3H, NCH<sub>2</sub>CH<sub>3</sub>), 1.28 **isomer a**, 1.31 **isomer b** (d, *J* = 6.3 Hz, 3H, CHCH<sub>3</sub>), 1.47-1.77 **isomer a/b** (m, 4H, CH<sub>2</sub>CH<sub>2</sub>), 2.34 **isomer a**, 2.39 **isomer b** (s, 3H, COCH<sub>3</sub>), 2.46 **isomer a**, 2.50 **isomer b** (t, *J* = 6.9 Hz, 2H, CH<sub>2</sub>CH<sub>2</sub>CH<sub>2</sub>N), 2.52 **isomer a**, 2.56 **isomer b** (q, *J* = 7.1 Hz, 2H, NCH<sub>2</sub>CH<sub>3</sub>), 2.71 **isomer a** (td, *J* = 6.0, 1.0 Hz, 2H, NCH<sub>2</sub>CH<sub>2</sub>O), 2.74 **isomer b** (t, *J* = 6.0 Hz, 2H, NCH<sub>2</sub>CH<sub>2</sub>O), 3.62-3.76 **isomer a/b** (m, 1H, CHCH<sub>3</sub>), 4.31 **isomer a** (t, *J* = 5.9 Hz, 2H, NCH<sub>2</sub>CH<sub>2</sub>O), 4.33 **isomer b** (td, *J* = 6.0, 1 Hz, 2H, NCH<sub>2</sub>CH<sub>2</sub>O), 5.10-5.24 **isomer a**, 5.24-5.35 **isomer b** (m, 1H, NH), 6.39 **isomer a**, 6.42 **isomer b** (d, *J* = 5.5 Hz, 1H, CHQn), 7.19-7.23 **isomer a/b** (m, 1H, CHQn), 7.26-7.41 **isomer a/b** (m, 4H, CHAr), 7.42 **isomer a**, 7.57 **isomer b** (s, 1H, C=CH), 7.69 **isomer a**, 7.76 **isomer b** (dd, *J* = 9.0, 1.6 Hz, 1H, CHQn), 7.92 **isomer a**, 7.93 **isomer b** (d, *J* = 2.1 Hz, 1H, CHQn), 8.48 **isomer a**, 8.49 **isomer b** (d, *J* = 2.8 Hz, 1H, CHQn). <sup>13</sup>C NMR (100 MHz, CDCl<sub>3</sub>,  $\delta$  ppm) 11.5 **isomer a**, 11.8 **isomer b** (NCH<sub>2</sub>CH<sub>3</sub>), 20.1 **isomer a**, 20.2 **isomer b** (CHCH<sub>3</sub>), 24.0 **isomer a**, 24.2 **isomer b** (CH<sub>2</sub>CH<sub>2</sub>), 26.5 **isomer a**, 31.3 **isomer b** (COCH<sub>3</sub>), 34.1 **isomer a**, 34.2 **isomer b** (CH<sub>2</sub>CH<sub>2</sub>), 48.0 **isomer a/b** (NCH<sub>2</sub>CH<sub>3</sub>), 48.3



**isomer a**, 48.4 **isomer b** (CHCH<sub>3</sub>), 51.3 **isomer a**, 51.5 **isomer b** (NCH<sub>2</sub>CH<sub>2</sub>O), 53.5 **isomer a**, 53.6 **isomer b** (CH<sub>2</sub>CH<sub>2</sub>CH<sub>2</sub>N), 63.7 **isomer a**, 63.8 **isomer b** (NCH<sub>2</sub>CH<sub>2</sub>O) 99.2 **isomer a/b** (CHQn), 117.2 **isomer a**, 117.3 **isomer b** (CQn), 121.3 **isomer a**, 121.4 **isomer b** (CHQn), 124.9 **isomer a**, 125.0 **isomer b** (CHAr), 127.4 **isomer a**, 127.7 **isomer b** (CHQn), 128.6 **isomer a/b** (CHQn), 129.0 **isomer a**, 129.5 **isomer b** (CHAr), 130.1 **isomer a**, 130.2 **isomer b** (CHAr), 130.5 **isomer a**, 130.6 **isomer b** (CHAr), 134.5, 134.6, 134.7, 134.8 (2C), 134.9, 135.2, 135.7 **isomer a/b** (C=CH, ClCQn, ClCAr, CAr), 139.1 **isomer a**, 139.7 **isomer b** (C=CH), 149.0 **isomer a**, 149.1 **isomer b** (CQnN), 149.2 **isomer a**, 149.3 **isomer b** (CQnN), 151.9 **isomer a/b** (CHQn), 164.1 **isomer a**, 167.2 **isomer b** (C=O), 194.6 **isomer a**, 202.9 **isomer b** (CH<sub>3</sub>C=O). HRMS C<sub>29</sub>H<sub>33</sub>Cl<sub>2</sub>N<sub>3</sub>O<sub>3</sub> [M+H]<sup>+</sup> 542.1972; found, 542.1972.

(*E/Z*)-2-((4-((7-chloroquinolin-4-yl)amino)pentyl)(ethyl)amino)ethyl 2-(4-chlorobenzylidene)-3-oxobutanoate (**7i**). Yellow viscous oil. Yield 74%. FT-IR (KBr,  $\nu_{\max}$  cm<sup>-1</sup>) 3402, 2969, 2870, 1729, 1698, 1612, 1575, 1538, 1452, 1378, 1332, 1248, 1201, 1150, 1092, 1014, 905, 879, 819, 758, 647. <sup>1</sup>H NMR (600 MHz, CDCl<sub>3</sub>,  $\delta$  ppm) 0.96 **isomer a**, 1.01 **isomer b** (t, *J* = 7.1 Hz, 3H, NCH<sub>2</sub>CH<sub>3</sub>), 1.27 **isomer a**, 1.31 **isomer b** (d, *J* = 6.3 Hz, 3H, CHCH<sub>3</sub>), 1.48-1.78 **isomer a/b** (m, 4H, CH<sub>2</sub>CH<sub>2</sub>), 2.34 **isomer a**, 2.39 **isomer b** (s, 3H, COCH<sub>3</sub>), 2.46 **isomer a**, 2.49 **isomer b** (t, *J* = 6.9 Hz, 2H, CH<sub>2</sub>CH<sub>2</sub>CH<sub>2</sub>N), 2.52 **isomer a**, 2.55 **isomer b** (q, *J* = 7.1 Hz, 2H, NCH<sub>2</sub>CH<sub>3</sub>), 2.70 **isomer a** (td, *J* = 6.0, 1.9 Hz, 2H, NCH<sub>2</sub>CH<sub>2</sub>O), 2.73 **isomer b** (t, *J* = 6.0 Hz, 2H, NCH<sub>2</sub>CH<sub>2</sub>O), 3.61-3.76 **isomer a/b** (m, 1H, CHCH<sub>3</sub>), 4.30 **isomer a**, 4.32 **isomer b** (t, *J* = 6.0 Hz, 2H, NCH<sub>2</sub>CH<sub>2</sub>O), 5.19 **isomer a**, 5.28 **isomer b** (d, *J* = 7.5 Hz, 1H, NH), 6.39 **isomer a**, 6.41 **isomer b** (d, *J* = 5.5 Hz, 1H, CHQn), 7.24-7.38 **isomer a/b** (m, 5H, CHQn and CHAr), 7.43 **isomer a**, 7.58 **isomer b** (s, 1H, C=CH), 7.69 **isomer a**, 7.75

**isomer b** (d,  $J = 9.0$  Hz, 1H, CHQn), 7.91 **isomer a**, 7.92 **isomer b** (d,  $J = 2.2$  Hz, 1H, CHQn), 8.48 **isomer a**, 8.49 **isomer b** (d,  $J = 3.6$  Hz, 1H, CHQn).  $^{13}\text{C}$  NMR (100 MHz,  $\text{CDCl}_3$ ,  $\delta$  ppm) 11.5 **isomer a**, 11.9 **isomer b** ( $\text{NCH}_2\text{CH}_3$ ), 20.2 **isomer a**, 20.3 **isomer b** ( $\text{CHCH}_3$ ), 24.1 **isomer a**, 24.3 **isomer b** ( $\text{CH}_2\text{CH}_2$ ), 26.5 **isomer a**, 31.4 **isomer b** ( $\text{COCH}_3$ ), 34.2 **isomer a**, 34.3 **isomer b** ( $\text{CH}_2\text{CH}_2$ ), 48.0 **isomer a**, 48.1 **isomer b** ( $\text{NCH}_2\text{CH}_3$ ), 48.3 **isomer a**, 48.4 **isomer b** ( $\text{CHCH}_3$ ), 51.5 **isomer a**, 51.6 **isomer b** ( $\text{NCH}_2\text{CH}_2\text{O}$ ), 53.5 **isomer a**, 53.7 **isomer b** ( $\text{CH}_2\text{CH}_2\text{CH}_2\text{N}$ ), 63.7 **isomer a**, 63.8 **isomer b** ( $\text{NCH}_2\text{CH}_2\text{O}$ ), 99.3 **isomer a/b** (CHQn), 117.3 **isomer a**, 117.4 **isomer b** (CQn), 121.3 **isomer a**, 121.4 **isomer b** (CHQn), 125.0 **isomer a**, 125.1 **isomer b** (CHAR), 128.8 **isomer a/b** (2CHQn), 129.2 **isomer a**, 129.3 **isomer b** (2CHAR), 130.8 **isomer a**, 130.9 **isomer b** (2CHAR), 131.2 **isomer a**, 131.4 **isomer b** (CAr), 134.4, 134.8 (2C), 135.0 **isomer a/b** ( $\text{C}=\text{CH}$ , ClCQn), 136.8 **isomer a**, 137.0 **isomer b** (ClCAr), 139.4 **isomer a**, 140.0 **isomer b** ( $\text{C}=\text{CH}$ ), 149.1 **isomer a**, 149.2 **isomer b** (CQnN), 149.4 **isomer a**, 149.5 **isomer b** (CQnN), 152.1 **isomer a/b** (CHQn), 164.3 **isomer a**, 167.6 **isomer b** ( $\text{C}=\text{O}$ ), 194.8 **isomer a**, 203.3 **isomer b** ( $\text{CH}_3\text{C}=\text{O}$ ). HRMS  $\text{C}_{29}\text{H}_{33}\text{Cl}_2\text{N}_3\text{O}_3$   $[\text{M}+\text{H}]^+$  542.1972; found, 542.1963.

(*E/Z*)-2-((4-((7-chloroquinolin-4-yl)amino)pentyl)(ethyl)amino)ethyl 2-(2-nitrobenzylidene)-3-oxobutanoate (**7j**). Yellowish brown viscous oil. Yield 78%. FT-IR (KBr,  $\nu_{\text{max}}$   $\text{cm}^{-1}$ ) 3408, 2969, 2864, 1731, 1698, 1608, 1575, 1532, 1454, 1378, 1345, 1244, 1201, 1150, 1078, 905, 879, 854, 811, 756, 700, 676.  $^1\text{H}$  NMR (600 MHz,  $\text{CDCl}_3$ ,  $\delta$  ppm) 0.90 **isomer a**, 1.02 **isomer b** (t,  $J = 7.1$  Hz, 3H,  $\text{NCH}_2\text{CH}_3$ ), 1.29 **isomer a**, 1.31 **isomer b** (d,  $J = 6.4$  Hz, 3H,  $\text{CHCH}_3$ ), 1.42-1.79 **isomer a/b** (m, 4H,  $\text{CH}_2\text{CH}_2$ ), 2.18 **isomer a** (s, 3H,  $\text{COCH}_3$ ), 2.36 **isomer a** (t,  $J = 7.0$  Hz, 2H,  $\text{CH}_2\text{CH}_2\text{CH}_2\text{N}$ ), 2.40 **isomer a** (q,  $J = 7.1$  Hz, 2H,  $\text{NCH}_2\text{CH}_3$ ), 2.45 **isomer a** (t,  $J = 6.1$  Hz, 2H,

$\text{NCH}_2\text{CH}_2\text{O}$ ), 2.47 **isomer b** (s, 3H,  $\text{COCH}_3$ ), 2.52 **isomer b** (t,  $J = 6.8$  Hz, 2H,  $\text{CH}_2\text{CH}_2\text{CH}_2\text{N}$ ), 2.58 **isomer b** (q,  $J = 7.1$  Hz, 2H,  $\text{NCH}_2\text{CH}_3$ ), 2.77 **isomer b** (t,  $J = 5.9$  Hz, 2H,  $\text{NCH}_2\text{CH}_2\text{O}$ ), 3.64-3.78 **isomer a/b** (m, 1H,  $\text{CHCH}_3$ ), 4.05 **isomer a** (t,  $J = 6.2$  Hz, 2H,  $\text{NCH}_2\text{CH}_2\text{O}$ ), 4.28-4.40 **isomer b** (m, 2H,  $\text{NCH}_2\text{CH}_2\text{O}$ ), 5.15 **isomer a**, 5.23 **isomer b** (d,  $J = 7.5$  Hz, 1H,  $\text{NH}$ ), 6.41 **isomer a/b** (t,  $J = 5.3$  Hz, 1H,  $\text{CHQn}$ ), 7.24-7.28 **isomer a** (m, 1H,  $\text{CHAr}$ ), 7.29 **isomer a**, 7.33 **isomer b** (dd,  $J = 9.0, 2.1$  Hz, 1H,  $\text{CHQn}$ ), 7.39-7.43 **isomer b** (m, 1H,  $\text{CHAr}$ ), 7.49-7.56 **isomer a/b** (m, 1H,  $\text{CHAr}$ ), 7.56-7.64 **isomer a/b** (m, 1H,  $\text{CHAr}$ ), 7.72 **isomer a**, 7.73 **isomer b** (d,  $J = 5.5$  Hz, 1H,  $\text{CHQn}$ ), 7.90 **isomer a**, 7.93 **isomer b** (d,  $J = 2.1$  Hz, 1H,  $\text{CHQn}$ ), 8.02 **isomer a**, 8.05 **isomer b** (s, 1H,  $\text{C}=\text{CH}$ ), 8.16 **isomer a**, 8.19 **isomer b** (dd,  $J = 8.0, 1.0$  Hz, 1H,  $\text{CHAr}$ ), 8.48 **isomer a**, 8.50 **isomer b** (d,  $J = 5.5$  Hz, 1H,  $\text{CHQn}$ ).  $^{13}\text{C}$  NMR (150 MHz,  $\text{CDCl}_3$ ,  $\delta$  ppm) 11.7 **isomer a**, 11.9 **isomer b** ( $\text{NCH}_2\text{CH}_3$ ), 20.2 **isomer**, 20.3 **isomer b** ( $\text{CHCH}_3$ ), 24.1 **isomer a**, 24.3 **isomer b** ( $\text{CH}_2\text{CH}_2$ ), 27.2 **isomer a**, 31.4 **isomer b** ( $\text{COCH}_3$ ), 34.3 **isomer a/b** ( $\text{CH}_2\text{CH}_2$ ), 48.0 **isomer a**, 48.1 **isomer b** ( $\text{NCH}_2\text{CH}_3$ ), 48.4 **isomer a**, 48.5 **isomer b** ( $\text{CHCH}_3$ ), 51.2 **isomer a**, 51.6 **isomer b** ( $\text{NCH}_2\text{CH}_2\text{O}$ ), 53.6 **isomer a**, 53.7 **isomer b** ( $\text{CH}_2\text{CH}_2\text{CH}_2\text{N}$ ), 63.6 **isomer a**, 63.9 **isomer b** ( $\text{NCH}_2\text{CH}_2\text{O}$ ), 99.3 **isomer a/b** ( $\text{CHQn}$ ), 117.4 **isomer a/b** ( $\text{CQn}$ ), 121.3 **isomer a**, 121.4 **isomer b** ( $\text{CHQn}$ ), 125.1 **isomer a/b** ( $\text{CHQn}$ ), 125.2 **isomer a/b** ( $\text{CHAr}$ ), 128.7 **isomer a**, 128.8 **isomer b** ( $\text{CHQn}$ ), 130.0 **isomer a** ( $\text{CAr}$ ), 130.1 **isomer a** ( $\text{CHAr}$ ), 130.3 **isomer a**, 130.4 **isomer b** ( $\text{CHAr}$ ), 130.7 **isomer b** ( $\text{CAr}$ ), 131.0 **isomer b** ( $\text{CHAr}$ ), 134.0 **isomer a/b** ( $\text{CHAr}$ ), 134.8 **isomer a**, 134.9 **isomer b** ( $\text{ClCQn}$ ), 136.1 **isomer a**, 136.6 **isomer b** ( $\text{C}=\text{CH}$ ), 139.5 **isomer a**, 140.4 **isomer b** ( $\text{C}=\text{CH}$ ), 147.0 **isomer a**, 147.2 **isomer b** ( $\text{ArCNO}_2$ ), 149.2 **isomer a/b** ( $\text{CQnN}$ ), 149.4 **isomer a/b** ( $\text{CQnN}$ ), 152.0 **isomer a/b** ( $\text{CHQn}$ ), 163.9 **isomer a**, 165.8 **isomer b** ( $\text{C}=\text{O}$ ), 194.8 **isomer a**, 200.8 **isomer b** ( $\text{CH}_3\text{C}=\text{O}$ ). HRMS  $\text{C}_{29}\text{H}_{33}\text{ClN}_4\text{O}_5$   $[\text{M}+\text{H}]^+$  553.2212; found, 553.2291.

(*E/Z*)-2-((4-((7-chloroquinolin-4-yl)amino)pentyl)(ethylamino)ethyl 2-(3-nitrobenzylidene)-3-oxobutanoate (**7k**). Yellowish viscous oil. Yield 59%. FT-IR (KBr,  $\nu_{\max}$   $\text{cm}^{-1}$ ) 3408, 2969, 2868, 1731, 1706, 1614, 1575, 1532, 1452, 1351, 1279, 1248, 1201, 1152, 1080, 908, 809, 733, 678, 647.  $^1\text{H}$  NMR (600 MHz,  $\text{CDCl}_3$ ,  $\delta$  ppm) 0.92 **isomer a**, 0.98 **isomer b** (t,  $J = 7.1$  Hz, 3H,  $\text{NCH}_2\text{CH}_3$ ), 1.24 **isomer a**, 1.28 **isomer b** (d,  $J = 6.4$  Hz, 3H,  $\text{CHCH}_3$ ), 1.45-1.75 **isomer a/b** (m, 4H,  $\text{CH}_2\text{CH}_2$ ), 2.34 **isomer a**, 2.39 **isomer b** (s, 3H,  $\text{COCH}_3$ ), 2.43 **isomer a**, 2.46 **isomer b** (t,  $J = 6.9$  Hz, 2H,  $\text{CH}_2\text{CH}_2\text{CH}_2\text{N}$ ), 2.49 **isomer a**, 2.53 **isomer b** (q,  $J = 7.1$  Hz, 2H,  $\text{NCH}_2\text{CH}_3$ ), 2.69 **isomer a**, 2.71 **isomer b** (t,  $J = 6.1$  Hz, 2H,  $\text{NCH}_2\text{CH}_2\text{O}$ ), 3.59-3.72 **isomer a/b** (m, 1H,  $\text{CHCH}_3$ ), 4.29 **isomer a** (td,  $J = 6.0, 1.0$  Hz, 2H,  $\text{NCH}_2\text{CH}_2\text{O}$ ), 4.32 **isomer b** (t,  $J = 6.2$  Hz, 2H,  $\text{NCH}_2\text{CH}_2\text{O}$ ), 5.30 **isomer a**, 5.33 **isomer b** (d,  $J = 7.5$  Hz, 1H,  $\text{NH}$ ), 6.36 **isomer a**, 6.38 **isomer b** (d,  $J = 5.6$  Hz, 1H,  $\text{CHQn}$ ), 7.18-7.23 **isomer a/b** (m, 1H,  $\text{CHQn}$ ), 7.44-7.52 **isomer a/b** (m, 1H,  $\text{CHAr}$ ), 7.47 **isomer a** (s, 1H,  $\text{C}=\text{CH}$ ), 7.56-7.58 **isomer a** (m, 1H,  $\text{CHAr}$ ), 7.59 **isomer b** (s, 1H,  $\text{C}=\text{CH}$ ), 7.66-7.69 **isomer b** (m, 1H,  $\text{CHAr}$ ), 7.70 **isomer a**, 7.73 **isomer b** (d,  $J = 9.0$  Hz, 1H,  $\text{CHQn}$ ), 7.83 **isomer a**, 7.84 **isomer b** (d,  $J = 2.2$  Hz, 1H,  $\text{CHQn}$ ), 8.12-8.15 **isomer a**, 8.15-8.17 **isomer b** (m, 1H,  $\text{CHAr}$ ), 8.20-8.23 **isomer a**, **isomer b** (m, 1H,  $\text{CHAr}$ ), 8.42 **isomer a**, 8.43 **isomer b** (d,  $J = 3.0$  Hz, 1H,  $\text{CHQn}$ ).  $^{13}\text{C}$  NMR (150 MHz,  $\text{CDCl}_3$ ,  $\delta$  ppm) 11.5 **isomer a**, 11.8 **isomer b** ( $\text{NCH}_2\text{CH}_3$ ), 20.1 **isomer a**, 20.2 **isomer b** ( $\text{CHCH}_3$ ), 23.9 **isomer a**, 24.1 **isomer b** ( $\text{CH}_2\text{CH}_2$ ), 26.7 **isomer a**, 31.3 **isomer b** ( $\text{COCH}_3$ ), 34.0 **isomer a**, 34.1 **isomer b** ( $\text{CH}_2\text{CH}_2$ ), 48.0 **isomer a**, 48.1 **isomer b** ( $\text{NCH}_2\text{CH}_3$ ), 48.2 **isomer a**, 48.3 **isomer b** ( $\text{CHCH}_3$ ), 51.3 **isomer a**, 51.5 **isomer b** ( $\text{NCH}_2\text{CH}_2\text{O}$ ), 53.5 **isomer a/b** ( $\text{CH}_2\text{CH}_2\text{CH}_2\text{N}$ ), 63.9 **isomer a**, 64.0 **isomer b** ( $\text{NCH}_2\text{CH}_2\text{O}$ ), 99.2 **isomer a/b** ( $\text{CHQn}$ ), 117.3 **isomer a/b** ( $\text{CQn}$ ), 121.4 **isomer a**, 121.5 **isomer b** ( $\text{CHQn}$ ), 123.5

**isomer a**, 124.2 **isomer b** (CHAr), 124.7 **isomer a/b** (CAr), 124.9 **isomer a/b** (CHQn), 128.4 **isomer a/b** (CHQn), 130.0 **isomer a/b** (CHAr), 134.3 **isomer a**, 134.5 **isomer b** (ClCQn), 134.7 **isomer a**, 134.8 **isomer b** (CHAr), 135.3 **isomer a/b** (CHAr), 136.6 **isomer a**, 136.7 **isomer b** (C=CH), 137.9 **isomer a**, 138.2 **isomer b** (C=CH), 148.3 **isomer a/b** (ArCNO<sub>2</sub>), 149.1 **isomer a/b** (CQnN), 149.2 **isomer a/b** (CQnN), 151.8 **isomer a/b** (CHQn), 163.8 **isomer a**, 166.8 **isomer b** (C=O), 194.4 **isomer a**, 202.2 **isomer b** (CH<sub>3</sub>C=O). HRMS C<sub>29</sub>H<sub>33</sub>ClN<sub>4</sub>O<sub>5</sub> [M+H]<sup>+</sup> 553.2212; found, 553.2220.

*(E/Z)-2-((4-((7-chloroquinolin-4-yl)amino)pentyl)(ethyl)amino)ethyl 2-(4-nitrobenzylidene)-3-oxobutanoate (7I)*. Yellowish viscous oil. Yield 59%. FT-IR (KBr,  $\nu_{\max}$  cm<sup>-1</sup>) 3410, 2971, 2868, 1731, 1714, 1575, 1519, 1454, 1347, 1244, 1199, 1078, 910, 854, 813, 733, 647. <sup>1</sup>H NMR (400 MHz, CDCl<sub>3</sub>,  $\delta$  ppm) 0.95 **isomer a**, 1.02 **isomer b** (t,  $J = 7.1$  Hz, 3H, NCH<sub>2</sub>CH<sub>3</sub>), 1.28 **isomer a**, 1.32 **isomer b** (d,  $J = 6.3$  Hz, 3H, CHCH<sub>3</sub>), 1.39-1.81 **isomer a/b** (m, 4H, CH<sub>2</sub>CH<sub>2</sub>), 2.35 **isomer a**, 2.43 **isomer b** (s, 3H, COCH<sub>3</sub>), 2.44-2.62 **isomer a/b** (m, 2H, CH<sub>2</sub>CH<sub>2</sub>CH<sub>2</sub>N and NCH<sub>2</sub>CH<sub>3</sub>), 2.68 **isomer a**, 2.75 **isomer b** (t,  $J = 5.9$  Hz, 2H, NCH<sub>2</sub>CH<sub>2</sub>O), 3.57-3.80 **isomer a/b** (m, 1H, CHCH<sub>3</sub>), 4.24-4.42 **isomer a/b** (m, 2H, NCH<sub>2</sub>CH<sub>2</sub>O), 5.28 **isomer a**, 5.35 **isomer b** (d,  $J = 7.5$  Hz, 1H, NH), 6.39 **isomer a**, 6.42 **isomer b** (d,  $J = 5.5$  Hz, 1H, CHQn), 7.25 **isomer a**, 7.27 **isomer b** (d,  $J = 1.8$  Hz, 1H, CHQn), 7.47 **isomer a** (d,  $J = 8.7$  Hz, 2H, CHAr), 7.51 **isomer a** (s, 1H, C=CH), 7.56 **isomer b** (d,  $J = 8.7$  Hz, 2H, CHAr), 7.63 **isomer b** (s, 1H, C=CH), 7.72 **isomer a**, 7.77 **isomer b** (d,  $J = 9.0$  Hz, 1H, CHQn), 7.89 **isomer a**, 7.90 **isomer b** (d,  $J = 2.2$  Hz, 1H, CHQn), 8.15 **isomer a**, 8.18 **isomer b** (d,  $J = 2.2$  Hz, 2H, CHAr), 8.47 **isomer a/b** (d,  $J = 6$  Hz, 1H, CHQn). <sup>13</sup>C NMR (100 MHz, CDCl<sub>3</sub>,  $\delta$  ppm)  $\delta$  11.4 **isomer a**, 11.8 **isomer b** (NCH<sub>2</sub>CH<sub>3</sub>), 20.1 **isomer**, 20.2 **isomer b** (CHCH<sub>3</sub>), 24.0 **isomer a**, 24.2 **isomer b** (CH<sub>2</sub>CH<sub>2</sub>), 26.7 **isomer a**, 31.3

**isomer b** (COCH<sub>3</sub>), 34.2 **isomer a/b** (CH<sub>2</sub>CH<sub>2</sub>), 47.9 **isomer a**, 48.0 **isomer b** (NCH<sub>2</sub>CH<sub>3</sub>), 48.3 **isomer a**, 48.4 **isomer b** (CHCH<sub>3</sub>), 51.5 **isomer a/b** (NCH<sub>2</sub>CH<sub>2</sub>O), 53.5 **isomer a**, 53.6 **isomer b** (CH<sub>2</sub>CH<sub>2</sub>CH<sub>2</sub>N), 64.0 **isomer a/b** (NCH<sub>2</sub>CH<sub>2</sub>O), 99.2 **isomer a/b** (CHQn), 117.2 **isomer a**, 117.3 **isomer b** (CQn), 121.4 **isomer a/b** (CHQn), 123.9 **isomer a**, 124.0 **isomer b** (2CHAr), 125.0 **isomer a/b** (CHQn), 128.4 **isomer a/b** (CHQn), 130.1 **isomer a**, 130.2 **isomer b** (2CHAr), 134.8 **isomer a/b** (ClCQn), 137.4 **isomer a/b** (C=CH), 137.9 **isomer a**, 138.3 **isomer b** (C=CH), 139.0 **isomer a**, 139.3 **isomer b** (CAr), 148.4 **isomer a/b** (ArCNO<sub>2</sub>), 149.1 **isomer a/b** (CQnN), 149.2 **isomer a**, 149.3 **isomer b** (CQnN), 151.8 **isomer a/b** (CHQn), 163.7 **isomer a**, 166.8 **isomer b** (C=O), 194.4 **isomer a**, 202.2 **isomer b** (CH<sub>3</sub>C=O). HRMS C<sub>29</sub>H<sub>33</sub>ClN<sub>4</sub>O<sub>5</sub> [M+H]<sup>+</sup> 553.2212; found, 553.2278.

*(E/Z)-2-((4-((7-chloroquinolin-4-yl)amino)pentyl)(ethyl)amino)ethyl*      *2-acetyl-5-phenylpenta-2,4-dienoate (7m)*. Yellow viscous oil. Yield 62%. FT-IR (KBr,  $\nu_{\max}$  cm<sup>-1</sup>) 3400, 3061, 2969, 2870, 1714, 1614, 1575, 1538, 1450, 1378, 1332, 1281, 1228, 1152, 1078, 1027, 977, 908, 879, 809, 751, 733, 690, 645. <sup>1</sup>H NMR (400 MHz, CDCl<sub>3</sub>,  $\delta$  ppm) 1.02 **isomer a/b** (t,  $J = 7.0$  Hz, 3H, NCH<sub>2</sub>CH<sub>3</sub>), 1.25 **isomer a**, 1.30 **isomer b** (d,  $J = 6.3$  Hz, 3H, CHCH<sub>3</sub>), 1.49-1.78 **isomer a/b** (m, 4H, CH<sub>2</sub>CH<sub>2</sub>), 2.39 **isomer a**, 2.46 **isomer b** (s, 3H, COCH<sub>3</sub>), 2.48-2.54 **isomer a/b** (m, 2H, CH<sub>2</sub>CH<sub>2</sub>CH<sub>2</sub>N), 2.54-2.64 **isomer a/b** (m, 2H, NCH<sub>2</sub>CH<sub>3</sub>), 2.75 **isomer a**, 2.80 **isomer b** (t,  $J = 5.8$  Hz, 2H, NCH<sub>2</sub>CH<sub>2</sub>O), 3.57-3.77 **isomer a/b** (m, 1H, CHCH<sub>3</sub>), 4.31 **isomer a**, 4.39 **isomer b** (t,  $J = 5.8$  Hz, 2H, NCH<sub>2</sub>CH<sub>2</sub>O), 5.09 **isomer a**, 5.20 **isomer b** (d,  $J = 7.5$  Hz, 1H, NH), 6.35 **isomer a**, 6.41 **isomer b** (d,  $J = 5.5$  Hz, 1H, CHQn), 6.98 **isomer a** (d,  $J = 15.5$  Hz, 1H, HC=CHPh), 7.02 **isomer b** (d,  $J = 14.4$  Hz, 1H, HC=CHPh), 7.18-7.56 **isomer a/b** (m, 1H, CHQn), 7.18-7.56 **isomer a/b** (m, 5H, CHAr), 7.18-7.56 **isomer a/b** (m,

1H, C=CH), 7.18-7.56 **isomer a/b** (m, 1H, CH=CH=CH), 7.68 **isomer a**, 7.75 **isomer b** (d,  $J = 9.0$  Hz, 1H, CHQn), 7.89-7.97 **isomer a/b** (m, 1H, CHQn), 8.47 **isomer a**, 8.49 **isomer b** (d,  $J = 5.5$  Hz, 1H, CHQn). <sup>13</sup>C NMR (100 MHz, CDCl<sub>3</sub>,  $\delta$  ppm) 11.6 **isomer a**, 11.9 **isomer b** (NCH<sub>2</sub>CH<sub>3</sub>), 20.3 **isomer a/b** (CHCH<sub>3</sub>), 24.2 **isomer a**, 24.3 **isomer b** (CH<sub>2</sub>CH<sub>2</sub>), 27.9 **isomer a**, 31.4 **isomer b** (COCH<sub>3</sub>), 34.4 **isomer a/b** (CH<sub>2</sub>CH<sub>2</sub>), 48.1 **isomer a**, 48.2 **isomer b** (NCH<sub>2</sub>CH<sub>3</sub>), 48.3 **isomer a**, 48.4 **isomer b** (CHCH<sub>3</sub>), 51.8 **isomer a/b** (NCH<sub>2</sub>CH<sub>2</sub>O), 53.7 **isomer a/b** (CH<sub>2</sub>CH<sub>2</sub>CH<sub>2</sub>N), 63.2 **isomer a**, 63.3 **isomer b** (NCH<sub>2</sub>CH<sub>2</sub>O), 99.3 **isomer a/b** (CHQn), 117.3 **isomer a**, 117.4 **isomer b** (CQn), 121.3 **isomer a/b** (CHQn), 123.4 **isomer a**, 123.8 **isomer b** (CH=CH=CH), 125.1 **isomer a/b** (CHQn), 128.0 **isomer a/b** (2CHAr), 128.8 **isomer a/b** (CHQn), 129.0 **isomer a/b** (2CHAr), 130.1 **isomer a/b** (CHAr), 131.8 **isomer a**, 132.5 **isomer b** (C=CH), 134.8 **isomer a/b** (ClCQn), 135.5 **isomer a**, 135.6 **isomer b** (CAr), 144.9 **isomer a**, 145.3 **isomer b** (HC=CHPh), 145.9 **isomer a/b** (C=CH), 149.1 **isomer a/b** (CQnN), 149.4 **isomer a**, 149.5 **isomer b** (CQnN), 152.1 **isomer a/b** (CHQn), 165.4 **isomer a**, 166.4 **isomer b** (C=O), 195.8 **isomer a**, 200.7 **isomer b** (CH<sub>3</sub>C=O). HRMS C<sub>31</sub>H<sub>36</sub>ClN<sub>3</sub>O<sub>3</sub> [M+H]<sup>+</sup> 534.2518; found, 534.2530.

(*E/Z*)-2-((4-((7-chloroquinolin-4-yl)amino)pentyl)(ethyl)amino)ethyl 2-(furan-2-ylmethylene)-3-oxobutanoate (**7n**). Brown viscous oil. Yield 77%. FT-IR (KBr,  $\nu_{\max}$  cm<sup>-1</sup>) 3400, 3123, 2969, 2868, 1714, 1661, 1622, 1575, 1538, 1454, 1378, 1335, 1252, 1207, 1150, 1080, 1020, 930, 908, 885, 852, 811, 756, 733, 647, 591, 558. <sup>1</sup>H NMR (400 MHz, CDCl<sub>3</sub>,  $\delta$  ppm) 0.99 **isomer a**, 1.00 **isomer b** (t,  $J = 7.1$  Hz, 3H, NCH<sub>2</sub>CH<sub>3</sub>), 1.28 **isomer a**, 1.30 **isomer b** (d,  $J = 6.4$  Hz, 3H, CHCH<sub>3</sub>), 1.47-1.78 **isomer a/b** (m, 4H, CH<sub>2</sub>CH<sub>2</sub>), 2.34 **isomer a**, 2.47 **isomer b** (s, 3H, COCH<sub>3</sub>), 2.47-2.64 **isomer a/b** (m, 4H, CH<sub>2</sub>CH<sub>2</sub>CH<sub>2</sub>N and NCH<sub>2</sub>CH<sub>3</sub>), 2.72 **isomer a** (t,  $J = 5.8$  Hz, 2H, NCH<sub>2</sub>CH<sub>2</sub>O), 2.80

**isomer b** (t,  $J = 6.2$  Hz, 2H,  $\text{NCH}_2\text{CH}_2\text{O}$ ) 3.61-3.77 **isomer a/b** (m, 1H,  $\text{CHCH}_3$ ), 4.28 **isomer a** (t,  $J = 5.8$  Hz, 2H,  $\text{NCH}_2\text{CH}_2\text{O}$ ), 4.41 **isomer b** (t,  $J = 6.2$  Hz, 2H,  $\text{NCH}_2\text{CH}_2\text{O}$ ), 5.15-5.27 **isomer a**, 5.28-5.39 **isomer b** (m, 1H,  $\text{NH}$ ), 6.40 **isomer a/b** (t,  $J = 5.4$  Hz, 1H,  $\text{CHQn}$ ), 6.46-6.53 **isomer a/b** (m, 1H,  $\text{CHAr}$ ), 6.71 **isomer a**, 6.81 **isomer b** (d,  $J = 3.5$  Hz, 1H,  $\text{CHAr}$ ), 7.23 **isomer a** (s, 1H,  $\text{CHAr}$ ), 7.24-7.31 **isomer a**, **isomer b** (m, 1H,  $\text{CHQn}$ ), 7.35 **isomer b** (s, 1H,  $\text{CHAr}$ ), 7.46-7.54 **isomer a/b** (m, 1H,  $\text{C=CH}$ ), 7.71 **isomer a**, 7.77 **isomer b** (d,  $J = 9.0$  Hz, 1H,  $\text{CHQn}$ ), 7.88-7.96 **isomer a/b** (m, 1H,  $\text{CHQn}$ ), 8.49 **isomer a/b** (d,  $J = 5.4$  Hz, 1H,  $\text{CHQn}$ ).  $^{13}\text{C}$  NMR (100 MHz,  $\text{CDCl}_3$ ,  $\delta$  ppm) 11.7 **isomer a**, 12.0 **isomer b** ( $\text{NCH}_2\text{CH}_3$ ), 20.3 **isomer a/b** ( $\text{CHCH}_3$ ), 24.1 **isomer a**, 24.4 **isomer b** ( $\text{CH}_2\text{CH}_2$ ), 26.4 **isomer a**, 31.3 **isomer b** ( $\text{COCH}_3$ ), 34.3 **isomer a**, 34.4 **isomer b** ( $\text{CH}_2\text{CH}_2$ ), 48.2 **isomer a**, 48.3 **isomer b** ( $\text{NCH}_2\text{CH}_3$ ), 48.4 **isomer a**, 48.5 **isomer b** ( $\text{CHCH}_3$ ), 51.5 **isomer a**, 51.6 **isomer b** ( $\text{NCH}_2\text{CH}_2\text{O}$ ), 53.6 **isomer a**, 53.7 **isomer b** ( $\text{CH}_2\text{CH}_2\text{CH}_2\text{N}$ ), 63.6 **isomer a**, 63.7 **isomer b** ( $\text{NCH}_2\text{CH}_2\text{O}$ ), 99.3 **isomer a/b** ( $\text{CHQn}$ ), 112.9 **isomer a**, 113.1 **isomer b** ( $\text{CHAr}$ ), 117.4 **isomer a**, 117.5 **isomer b** ( $\text{CQn}$ ), 118.1 **isomer a**, 119.0 **isomer b** ( $\text{CHAr}$ ), 121.4 **isomer a**, 121.5 **isomer b** ( $\text{CHQn}$ ), 125.0 **isomer a**, 125.1 **isomer b** ( $\text{CHQn}$ ), 126.3 **isomer a**, 126.8 **isomer b** ( $\text{CHAr}$ ), 128.8 **isomer a/b** ( $\text{CHQn}$ ), 129.5 **isomer a**, 130.1 **isomer b** ( $\text{C=CH}$ ), 134.8 **isomer a**, 134.9 **isomer b** ( $\text{ClCQn}$ ), 146.4 **isomer a**, 146.6 **isomer b** ( $\text{C=CH}$ ), 148.9, 149.2 (2C), 149.3, 149.5 **isomer a/b** (2CQnN,  $\text{CAr}$ ), 152.1 **isomer a/b** ( $\text{CHQn}$ ), 164.6 **isomer a**, 167.5 **isomer b** ( $\text{C=O}$ ), 194.3 **isomer a**, 202.4 **isomer b** ( $\text{CH}_3\text{C=O}$ ). HRMS  $\text{C}_{27}\text{H}_{32}\text{ClN}_3\text{O}_4$   $[\text{M}+\text{H}]^+$  498.2154; found, 498.2181.

(*E/Z*)-2-((4-((7-chloroquinolin-4-yl)amino)pentyl)(ethyl)amino)ethyl 3-oxo-2-(thiophen-2-ylmethylene)butanoate (**o**). Yellow viscous oil. Yield 62%. FT-IR (KBr,  $\nu_{\text{max}}$   $\text{cm}^{-1}$ ) 3402, 3104, 2969, 2868, 1716, 1659, 1610, 1577, 1538, 1452, 1421, 1378, 1335, 1246,



1203, 1152, 1078, 1055, 975, 908, 879, 856, 809, 731, 647. <sup>1</sup>H NMR (400 MHz, CDCl<sub>3</sub>, δ ppm) 1.00 **isomer a/b** (q, *J* = 7.0 Hz, 3H, NCH<sub>2</sub>CH<sub>3</sub>), 1.27 **isomer a**, 1.30 **isomer b** (d, *J* = 6.4 Hz, 3H, CHCH<sub>3</sub>), 1.46-1.78 **isomer a/b** (m, 4H, CH<sub>2</sub>CH<sub>2</sub>), 2.36 **isomer a** (s, 3H, COCH<sub>3</sub>), 2.45-2.52 **isomer a/b** (m, 2H, CH<sub>2</sub>CH<sub>2</sub>CH<sub>2</sub>N), 2.48 **isomer b** (s, 3H, COCH<sub>3</sub>), 2.55 **isomer a**, 2.56 **isomer b** (q, *J* = 7.1 Hz, 2H, NCH<sub>2</sub>CH<sub>3</sub>), 2.73 **isomer a**, 2.80 **isomer b** (t, *J* = 6.0 Hz, 2H, NCH<sub>2</sub>CH<sub>2</sub>O), 3.60-3.77 **isomer a/b** (m, 1H, CHCH<sub>3</sub>), 4.30 **isomer a** (t, *J* = 6.0 Hz, 2H, NCH<sub>2</sub>CH<sub>2</sub>O), 4.41 **isomer b** (td, *J* = 6.0, 1.8 Hz, 2H, NCH<sub>2</sub>CH<sub>2</sub>O), 5.32 **isomer a**, 5.37 **isomer b** (d, *J* = 7.5 Hz, 1H, NH), 6.39 **isomer a**, 6.41 **isomer b** (d, *J* = 5.6 Hz, 1H, CHQn), 7.06 **isomer a**, 7.07 **isomer b** (t, *J* = 3.6 Hz, 1H, CHAr), 7.24 **isomer a**, 7.26 **isomer b** (dd, *J* = 8.7, 2.2 Hz, 1H, CHQn), 7.30-7.33 **isomer a**, 7.36-7.42 **isomer b** (m, 1H, CHAr), 7.49-7.52 **isomer a**, 7.52-7.57 **isomer b** (m, 1H, CHAr), 7.65 **isomer a** (s, 1H, C=CH), 7.74 **isomer a**, 7.80 **isomer b** (d, *J* = 9.0 Hz, 1H, CHQn), 7.76 **isomer b** (s, 1H, C=CH), 7.92 **isomer a/b** (t, *J* = 2 Hz, 1H, CHQn), 8.47 **isomer a**, 8.49 **isomer b** (d, *J* = 1.4 Hz, 1H, CHQn). <sup>13</sup>C NMR (100 MHz, CDCl<sub>3</sub>, δ ppm) 11.6 **isomer a**, 11.9 **isomer b** (NCH<sub>2</sub>CH<sub>3</sub>), 20.1 **isomer a**, 20.2 **isomer b** (CHCH<sub>3</sub>), 24.1 **isomer a**, 24.3 **isomer b** (CH<sub>2</sub>CH<sub>2</sub>), 26.7 **isomer a**, 31.0 **isomer b** (COCH<sub>3</sub>), 34.2 **isomer a/b** (CH<sub>2</sub>CH<sub>2</sub>), 48.0 **isomer a**, 48.1 **isomer b** (NCH<sub>2</sub>CH<sub>3</sub>), 48.3 **isomer a**, 48.4 **isomer b** (CHCH<sub>3</sub>), 51.5 **isomer a**, 51.6 **isomer b** (NCH<sub>2</sub>CH<sub>2</sub>O), 53.5 **isomer a**, 53.7 **isomer b** (CH<sub>2</sub>CH<sub>2</sub>CH<sub>2</sub>N), 63.5 **isomer a**, 63.9 **isomer b** (NCH<sub>2</sub>CH<sub>2</sub>O), 99.2 **isomer a/b** (CHQn), 117.4 **isomer a/b** (CQn), 121.5 **isomer a/b** (CHQn), 125.0 **isomer a/b** (CHQn), 128.0 **isomer a**, 128.1 **isomer b** (CHAr), 128.6 **isomer a/b** (CHQn), 129.4 **isomer a**, 130.5 **isomer b** (C=CH), 132.2 **isomer a**, 132.5 **isomer b** (CHAr), 134.3 **isomer a/b** (C=CH) 134.7 **isomer a/b** (ClCQn), 135.1 **isomer a**, 135.3 **isomer b** (CHAr), 135.9 **isomer a**, 136.1 **isomer b** (CAr), 149.2 **isomer a/b** (CQnN), 149.4 **isomer a/b** (CQnN), 152.0 **isomer a/b** (CHQn), 164.8 **isomer a**, 167.3 **isomer b**

(C=O), 194.7 **isomer a**, 202.6 **isomer b** (CH<sub>3</sub>C=O). HRMS C<sub>27</sub>H<sub>32</sub>ClN<sub>3</sub>O<sub>3</sub>S [M+H]<sup>+</sup>  
514.1926; found, 514.1910.

## Selected $^1\text{H}$ and $^{13}\text{C}$ NMR spectra

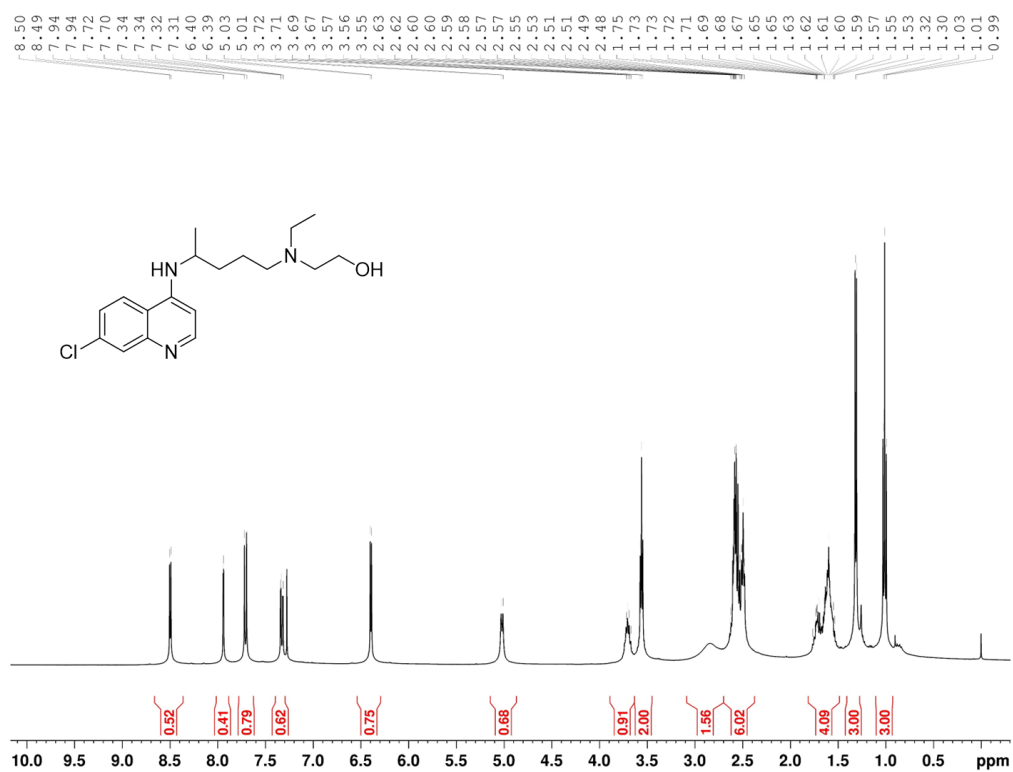

**Figure S1.**  $^1\text{H}$  NMR (400 MHz,  $\text{CDCl}_3$ ) spectrum of **4**.

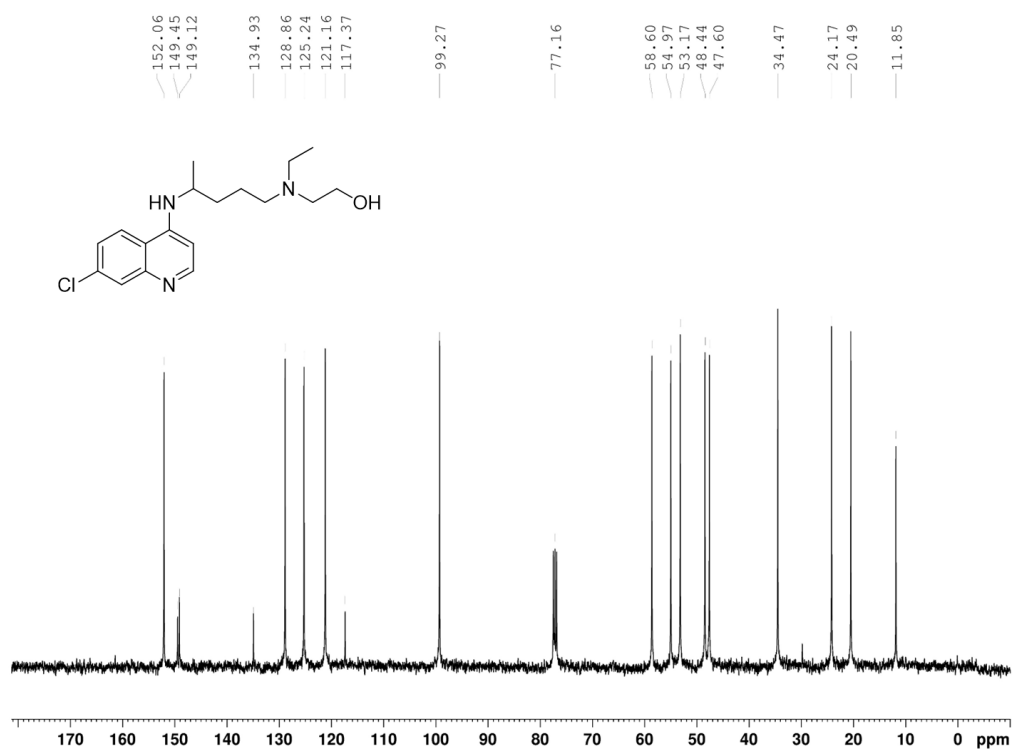

**Figure S2.**  $^{13}\text{C}$  NMR (100 MHz,  $\text{CDCl}_3$ ) spectrum of **4**.

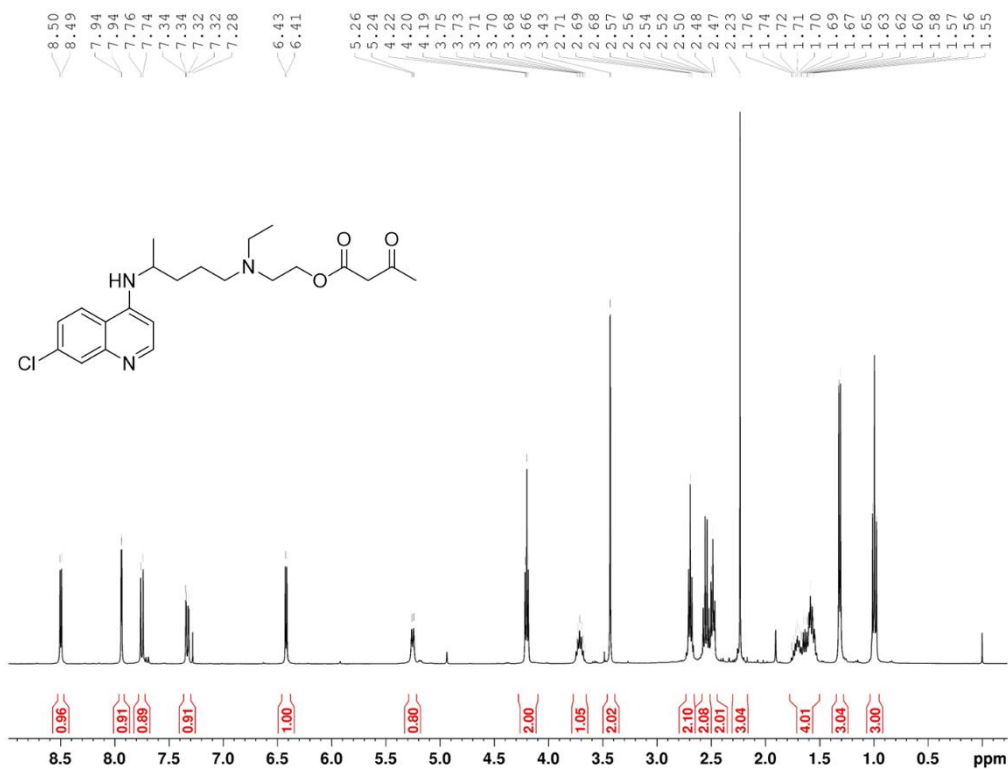

Figure S3. <sup>1</sup>H NMR (400 MHz, CDCl<sub>3</sub>) spectrum of 5.

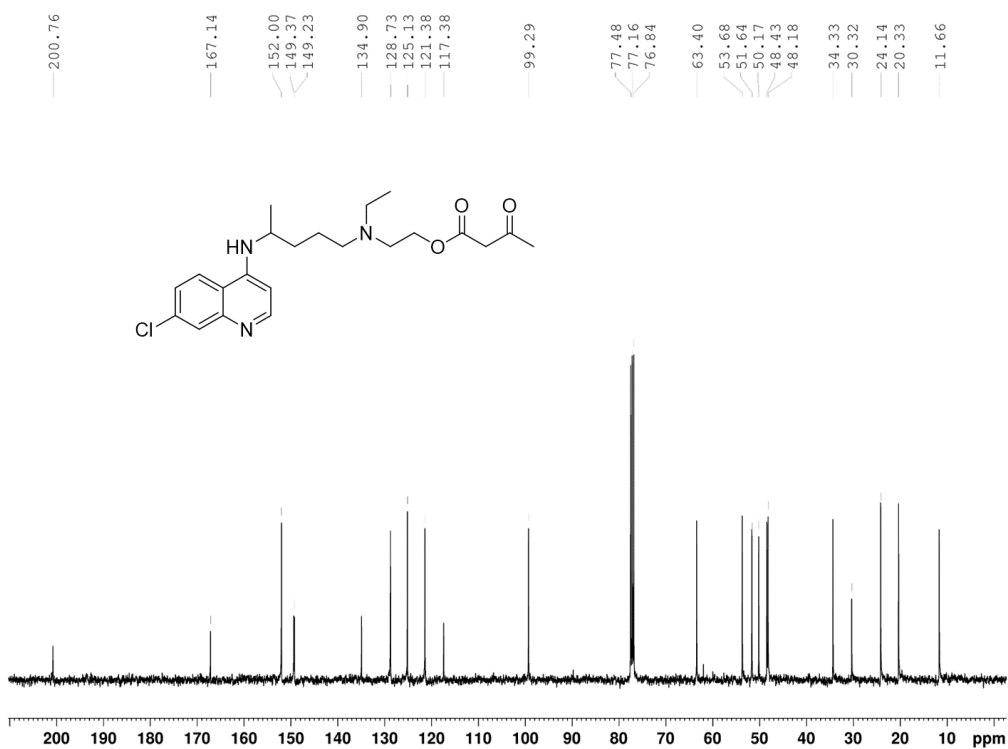

Figure S4. <sup>13</sup>C NMR (100 MHz, CDCl<sub>3</sub>) spectrum of 5.

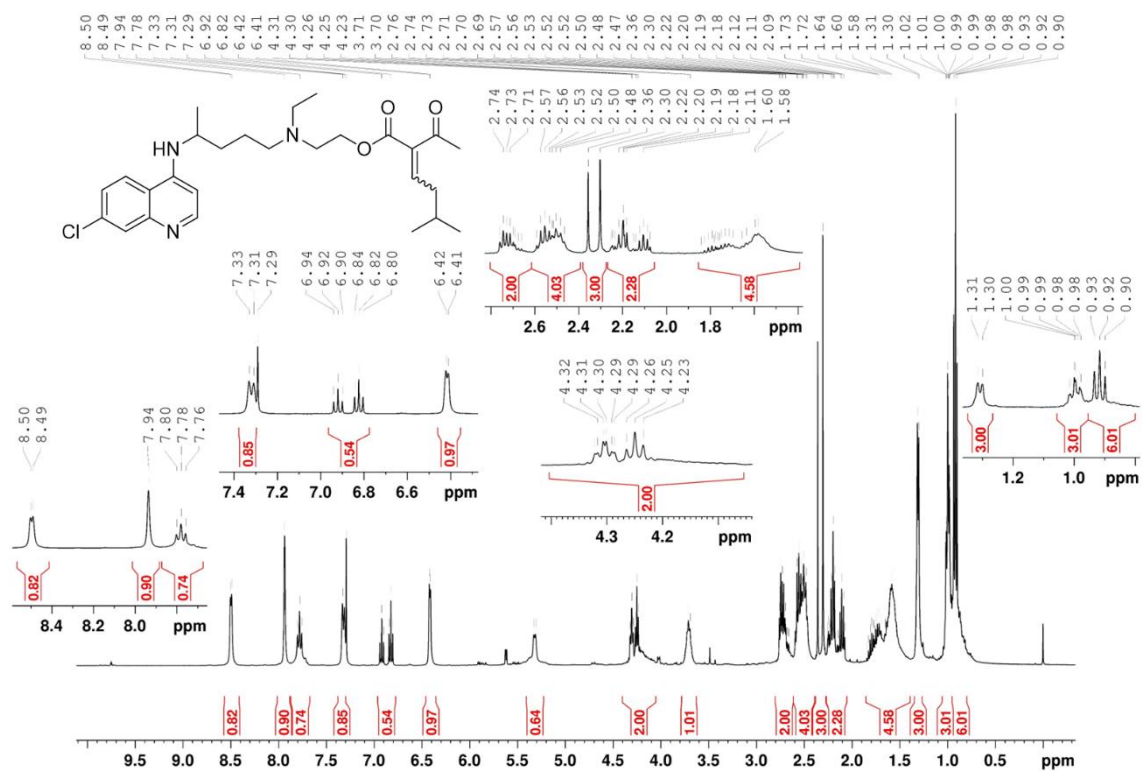

Figure S5.  $^1\text{H}$  NMR (400 MHz,  $\text{CDCl}_3$ ) spectrum of (E/Z)-7a.

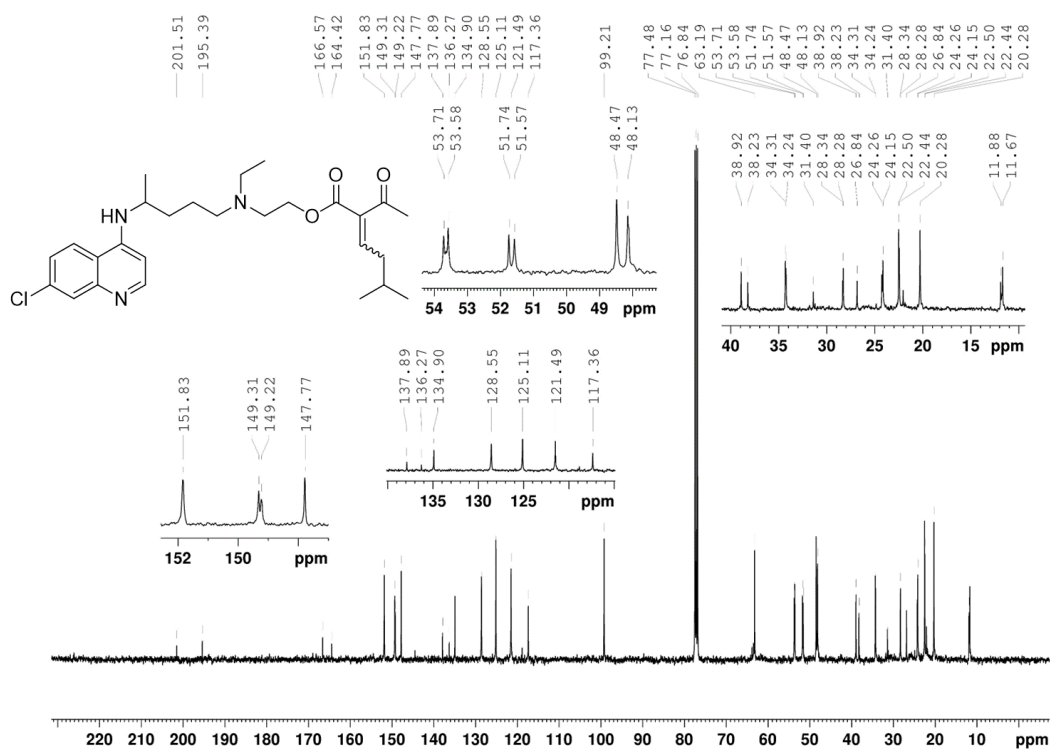

Figure S6.  $^{13}\text{C}$  NMR (100 MHz,  $\text{CDCl}_3$ ) spectrum of (E/Z)-7a.

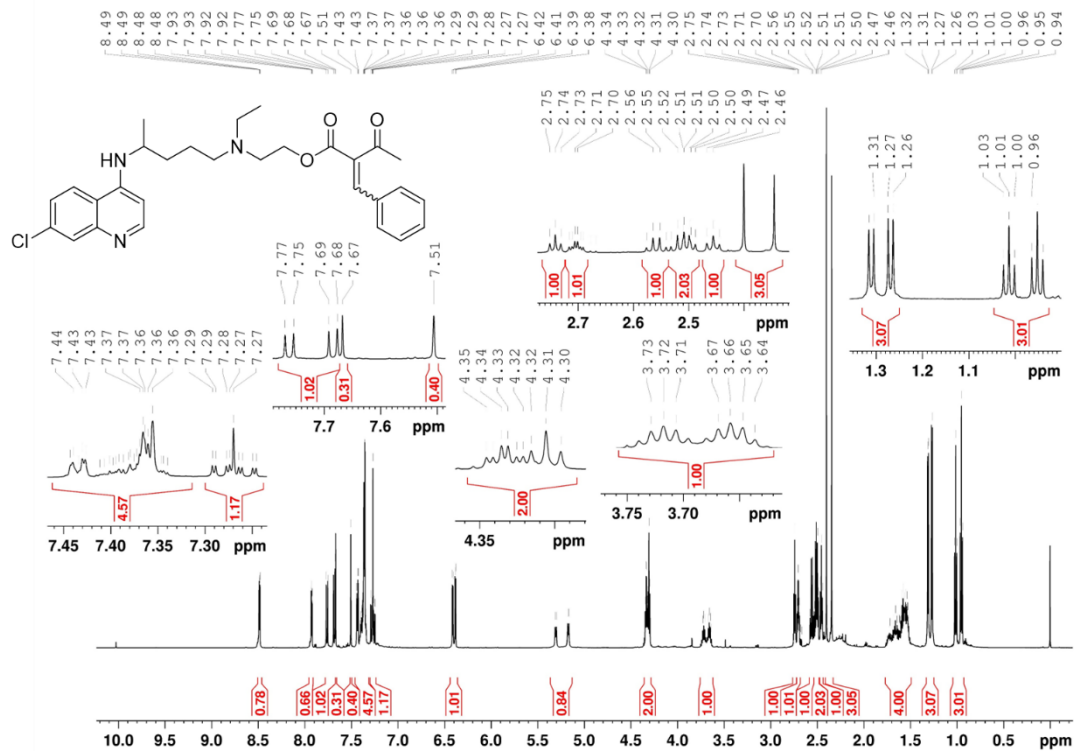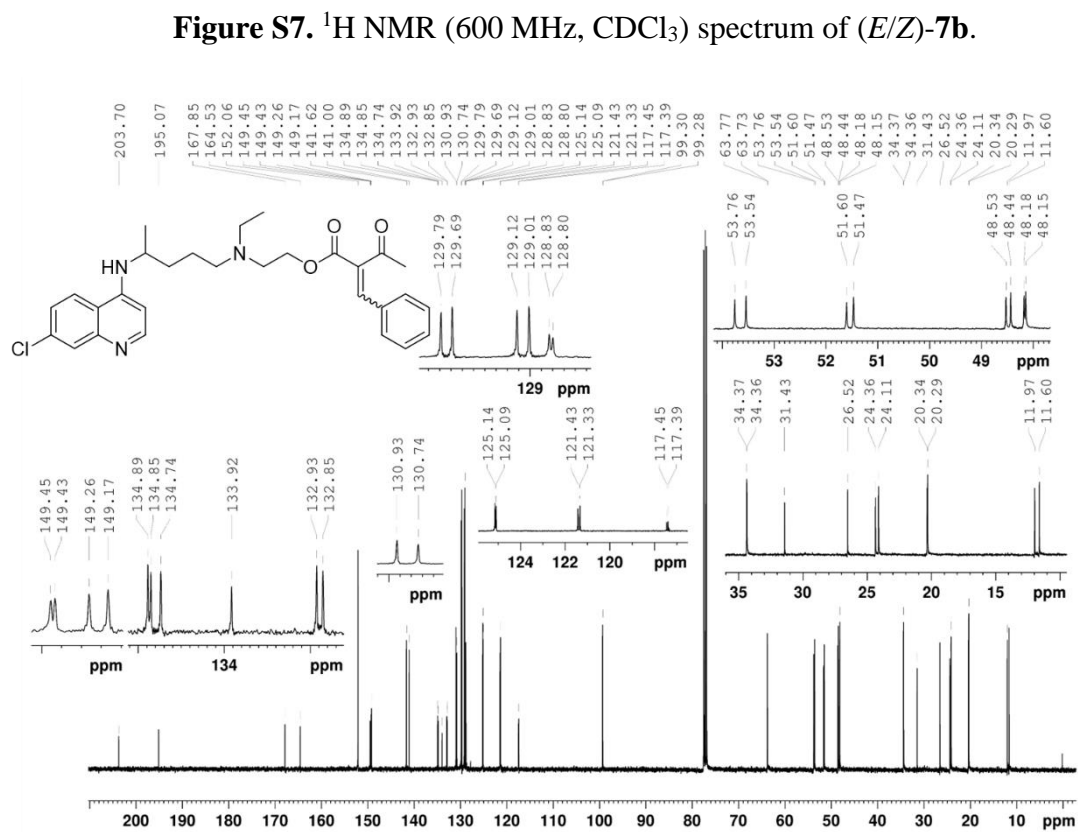



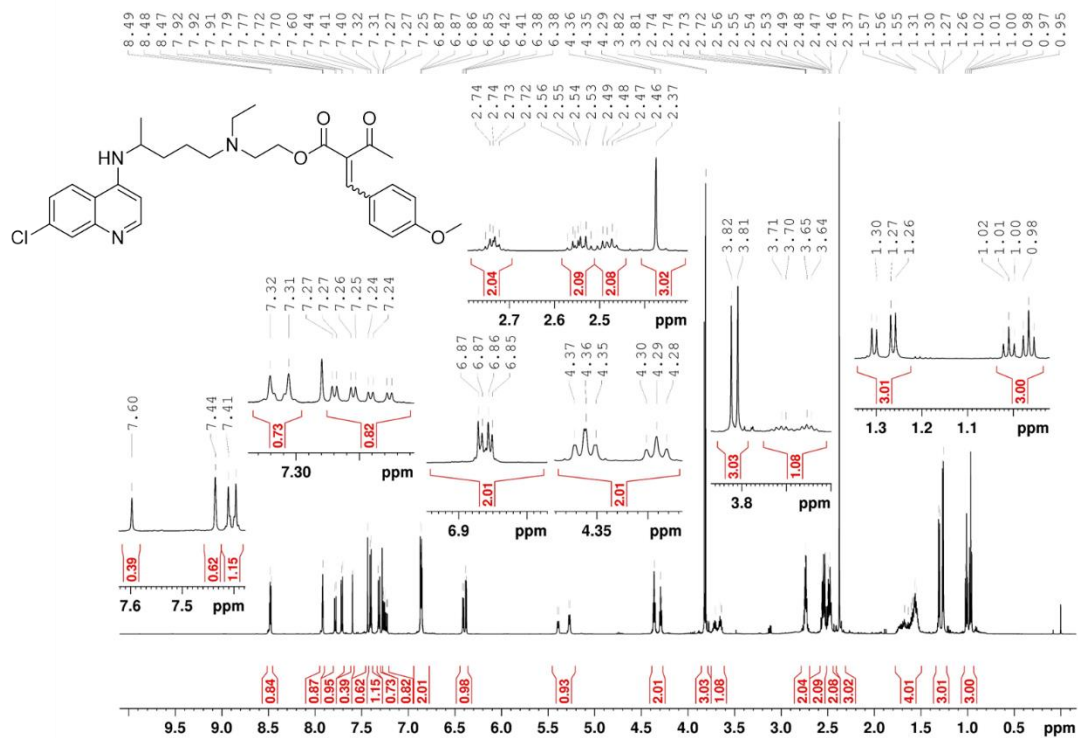

**Figure S11.**  $^1\text{H}$  NMR (600 MHz,  $\text{CDCl}_3$ ) spectrum of (*E/Z*)-7d.

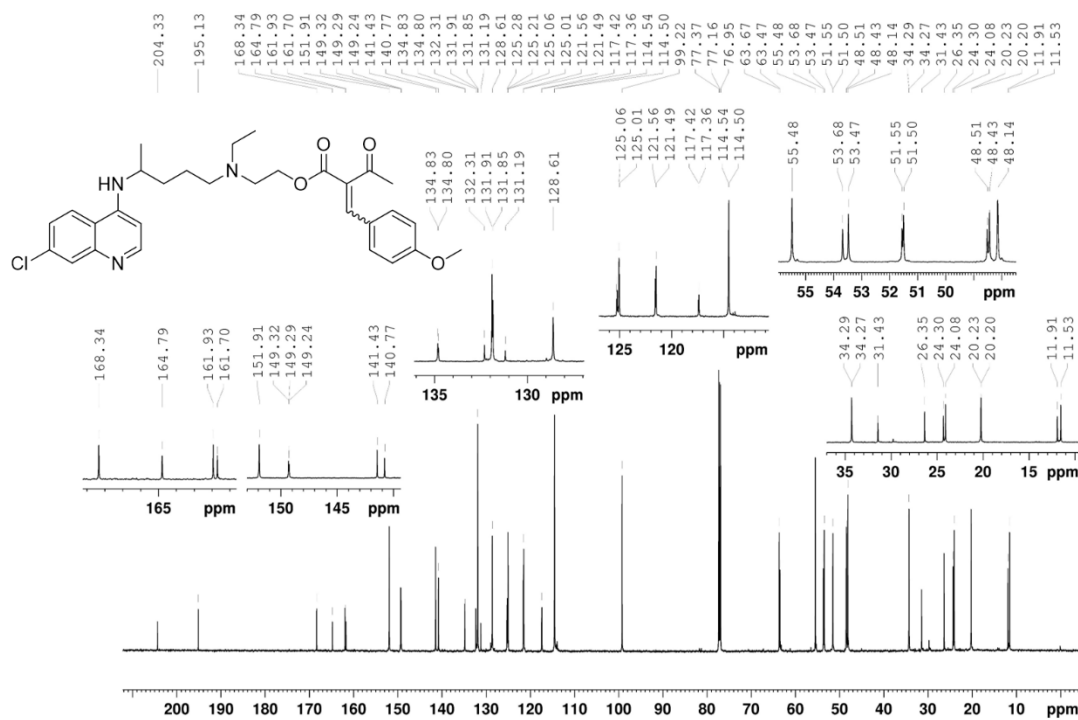

**Figure S12.**  $^{13}\text{C}$  NMR (150 MHz,  $\text{CDCl}_3$ ) spectrum of (*E/Z*)-7d.



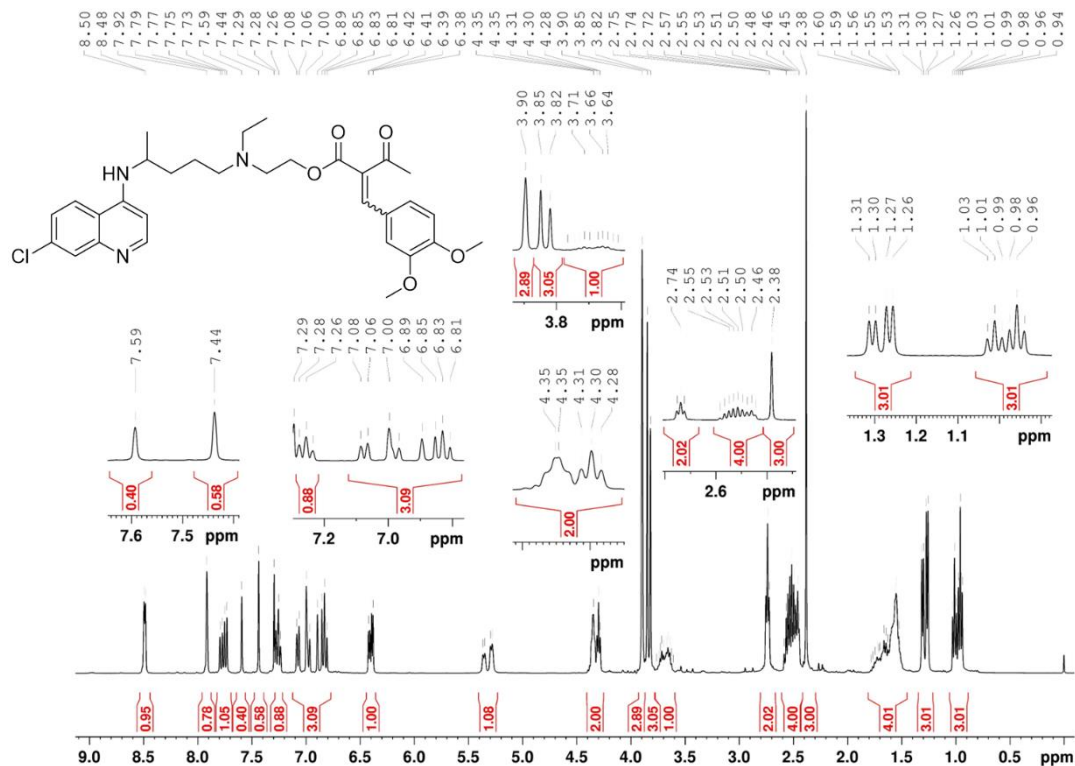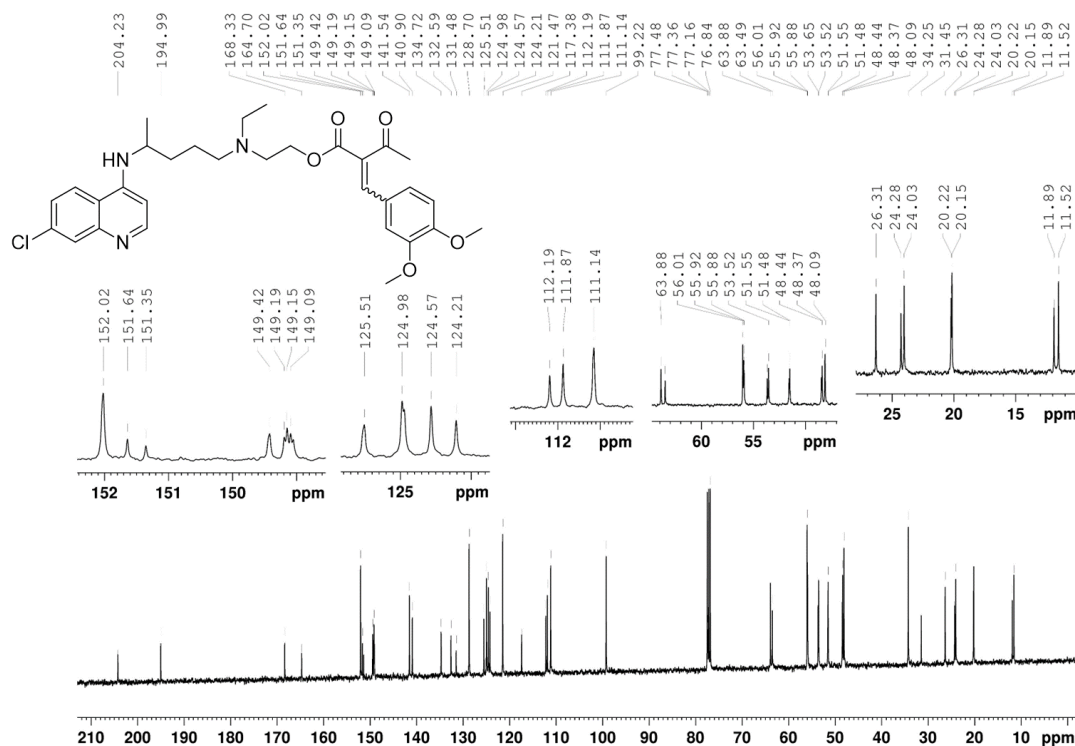

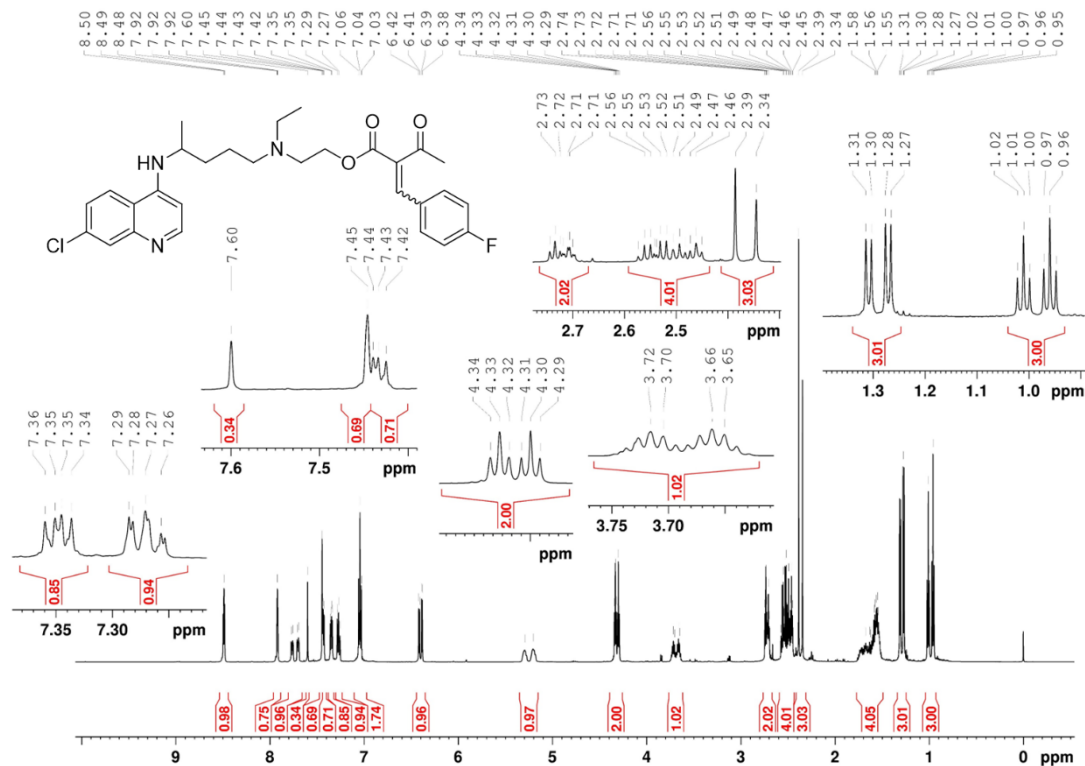

Figure S15. <sup>1</sup>H NMR (600 MHz, CDCl<sub>3</sub>) spectrum of (E/Z)-7f.

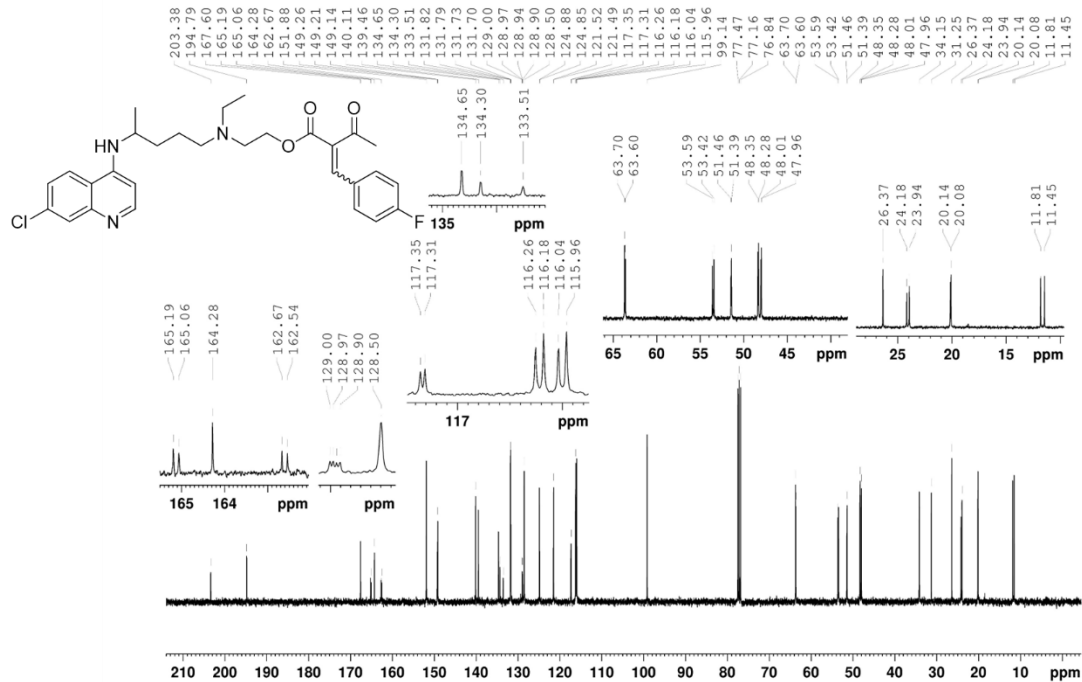

Figure S16. <sup>13</sup>C NMR (100 MHz, CDCl<sub>3</sub>) spectrum of (E/Z)-7f.

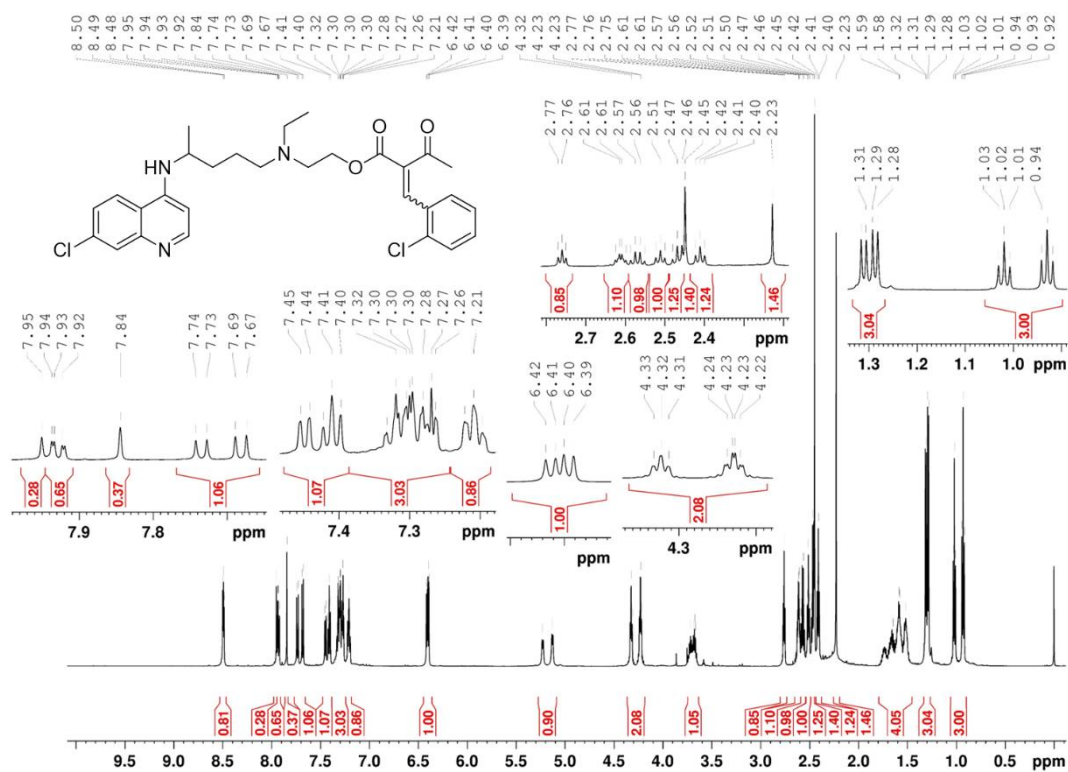

Figure S17.  $^1\text{H}$  NMR (600 MHz,  $\text{CDCl}_3$ ) spectrum of (*E/Z*)-**7g**.

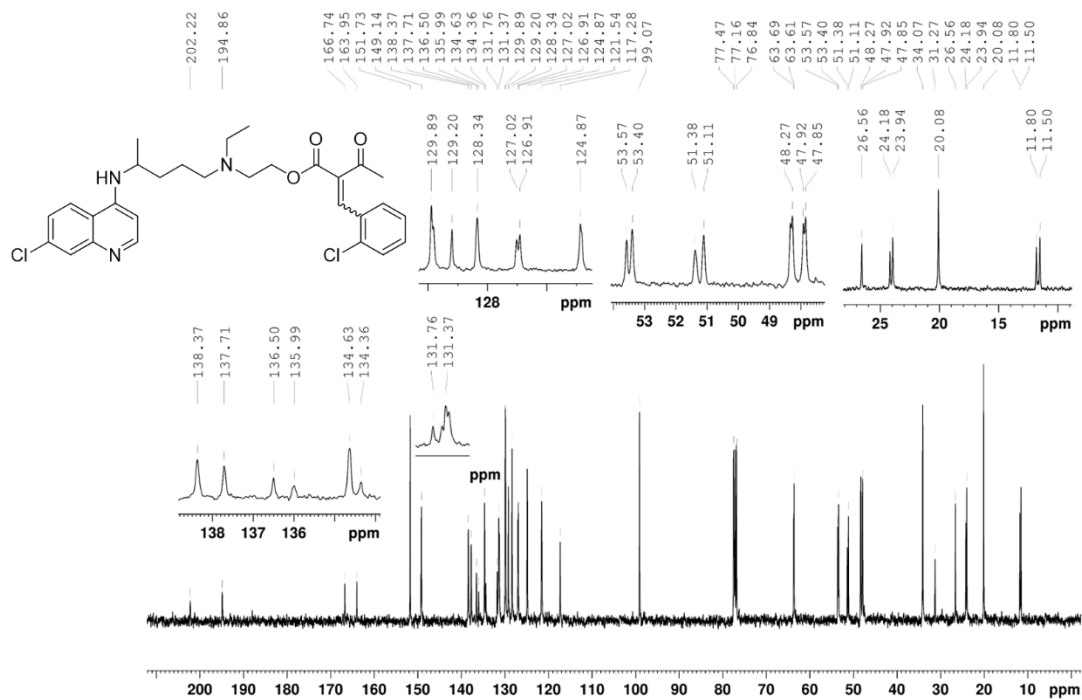

Figure S18.  $^{13}\text{C}$  NMR (100 MHz,  $\text{CDCl}_3$ ) spectrum of (*E/Z*)-**7g**.

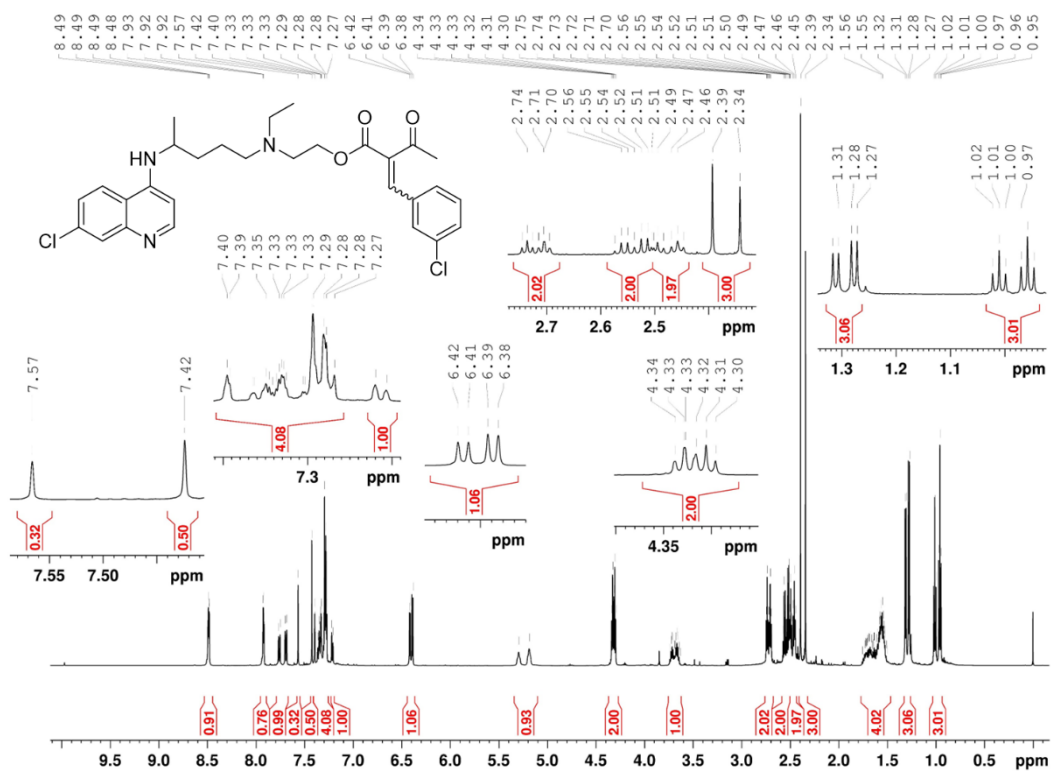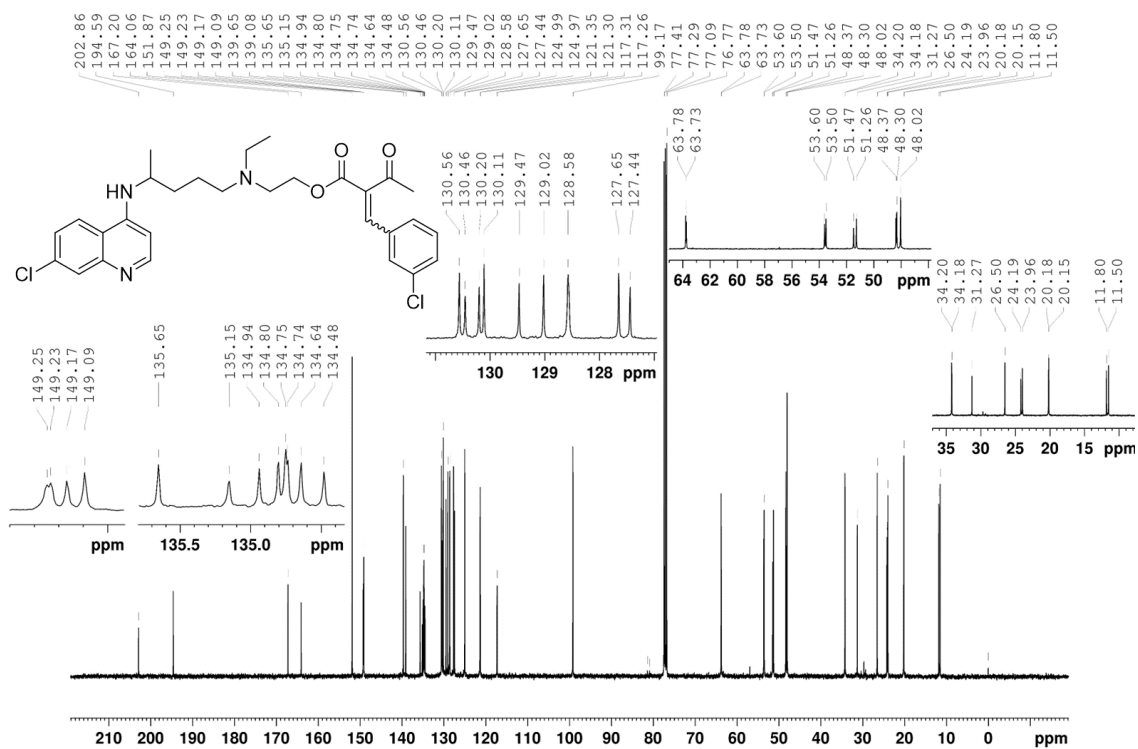

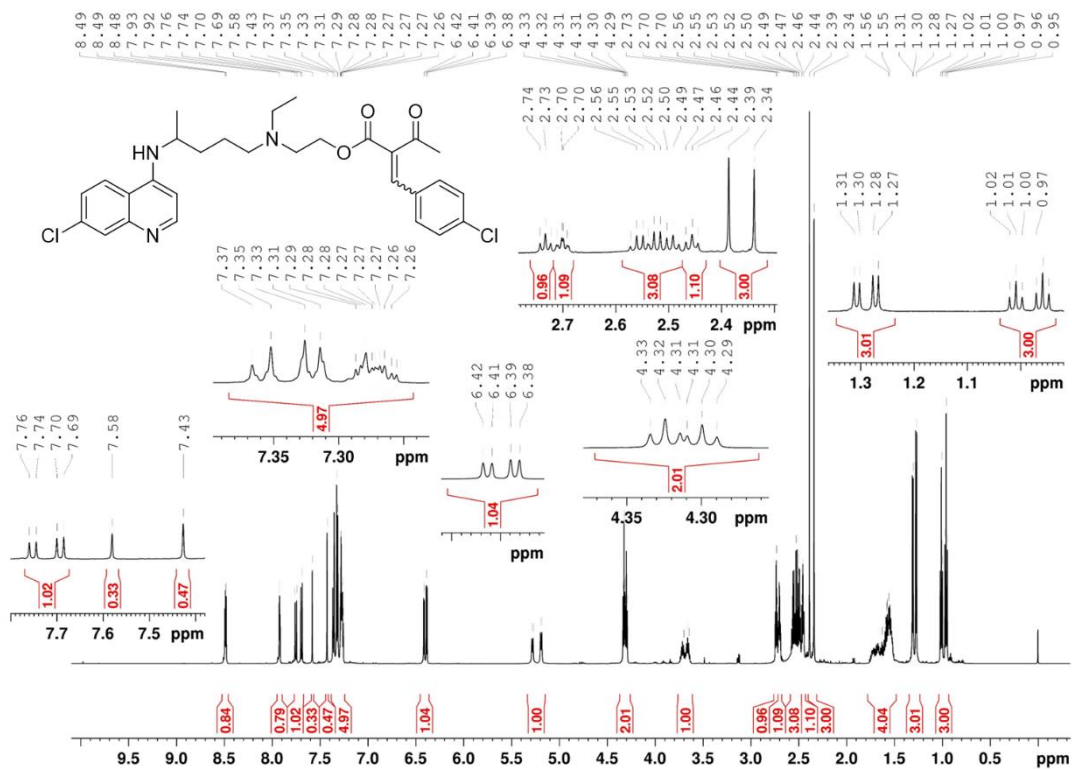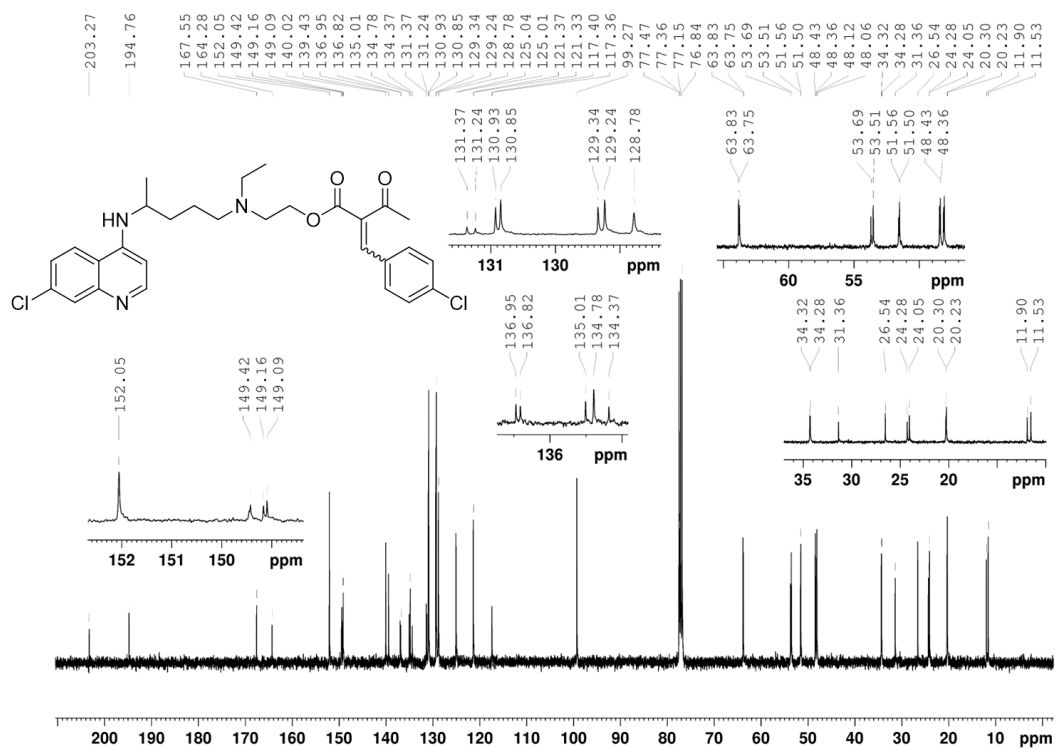



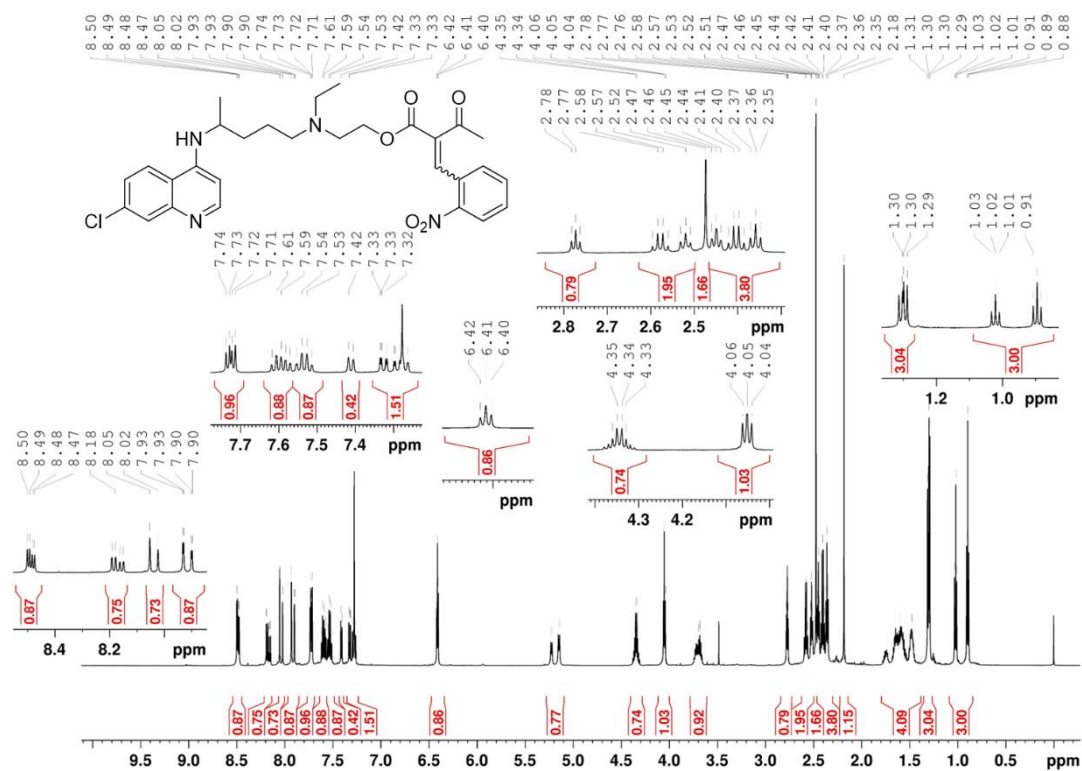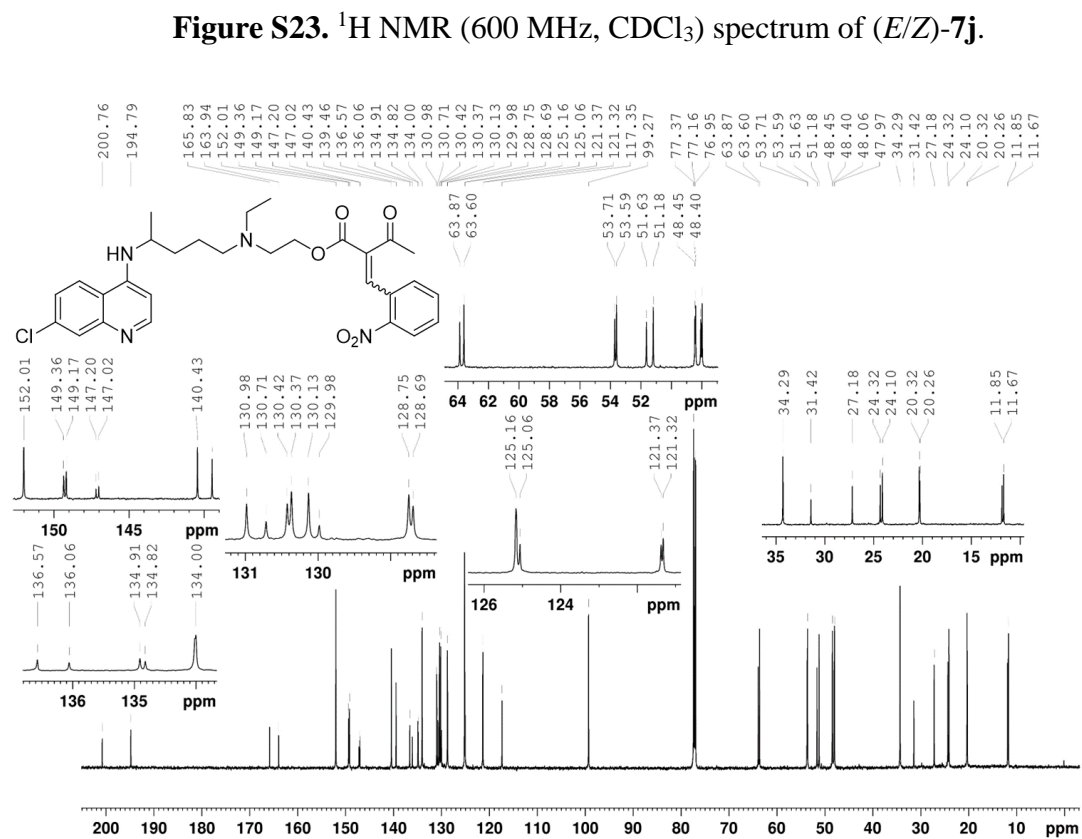

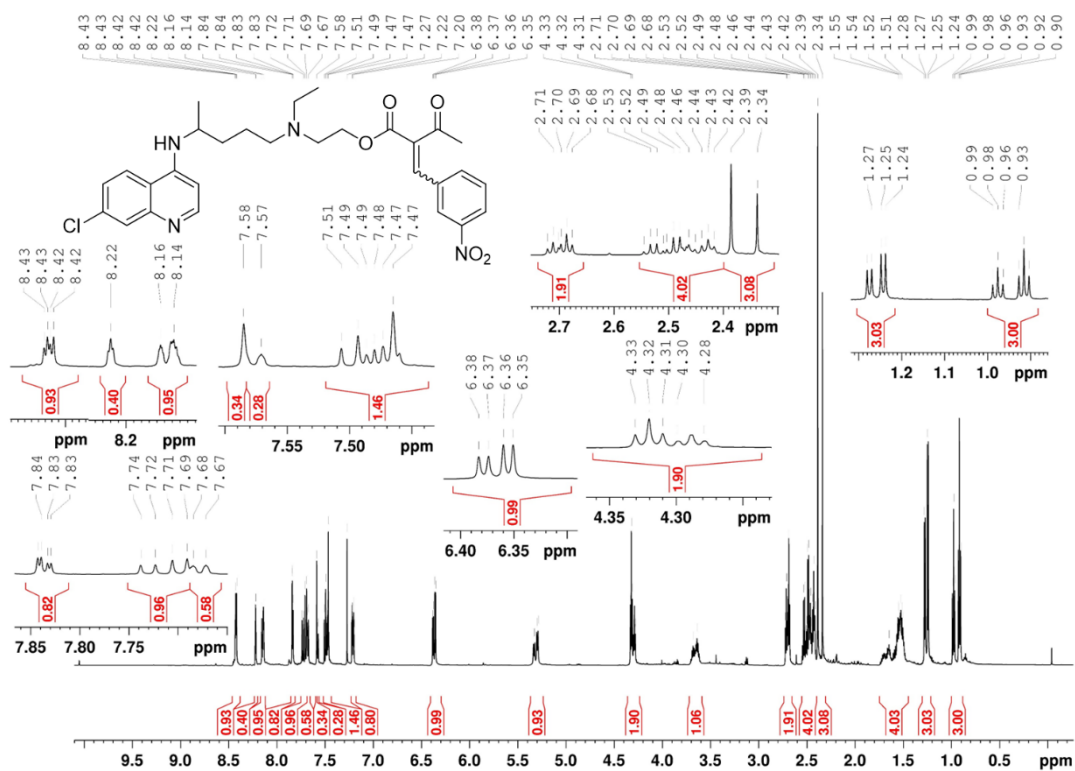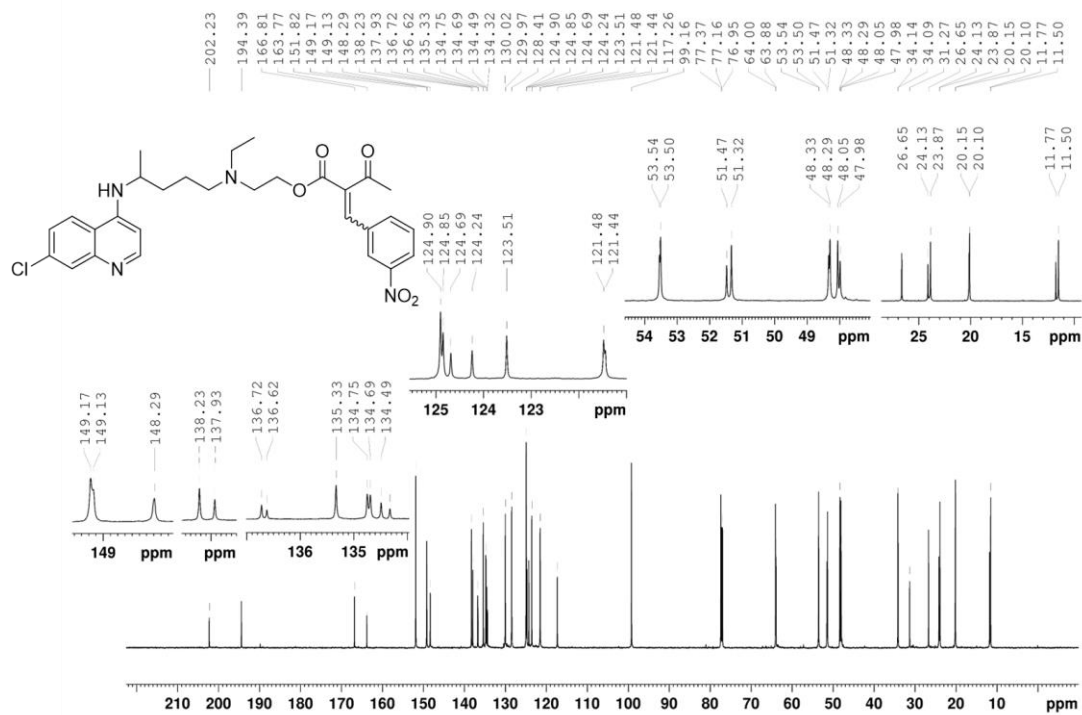

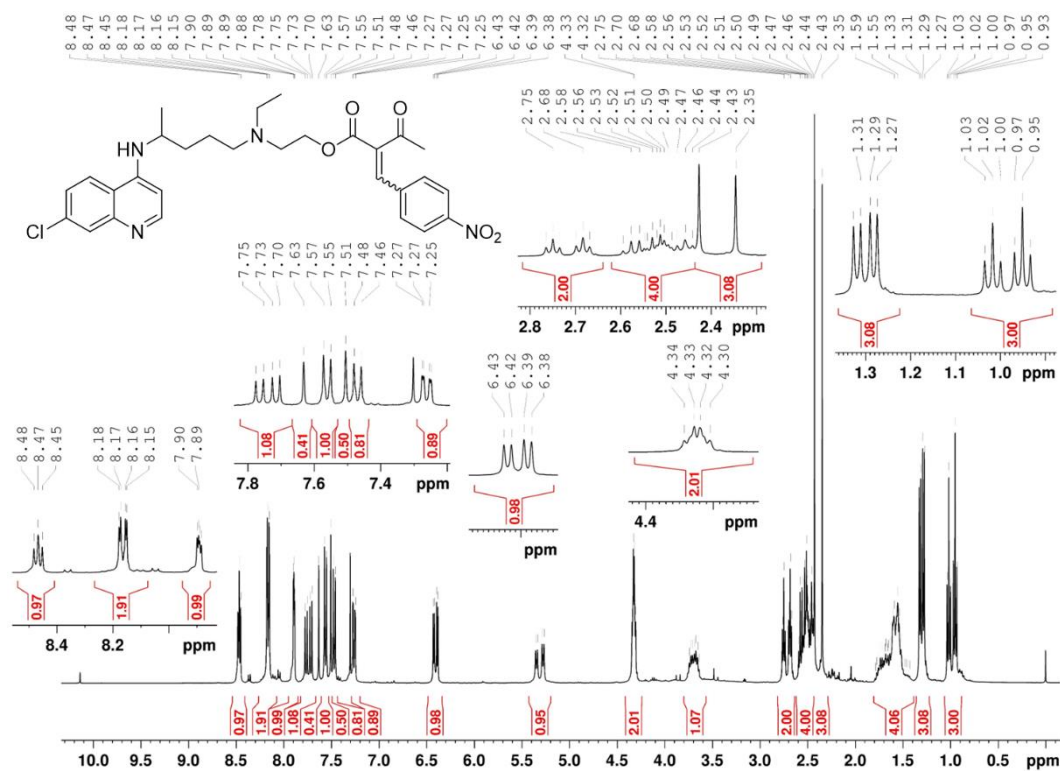

Figure S27. <sup>1</sup>H NMR (400 MHz, CDCl<sub>3</sub>) spectrum of *(E/Z)*-71.

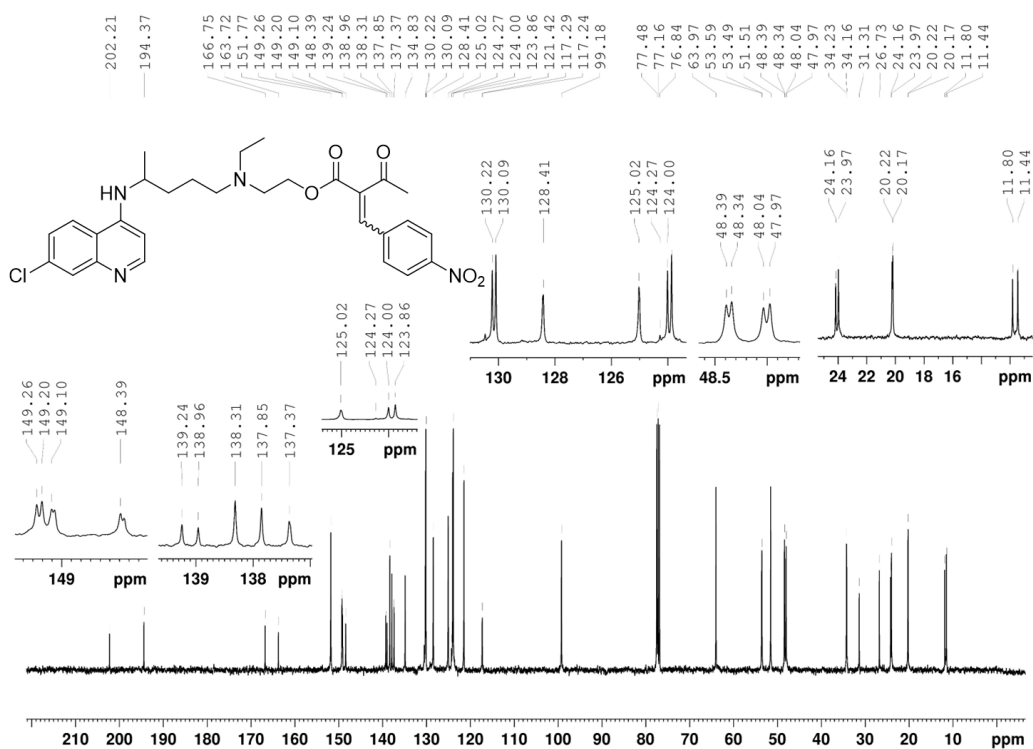

Figure S28. <sup>13</sup>C NMR (100 MHz, CDCl<sub>3</sub>) spectrum of *(E/Z)*-71.



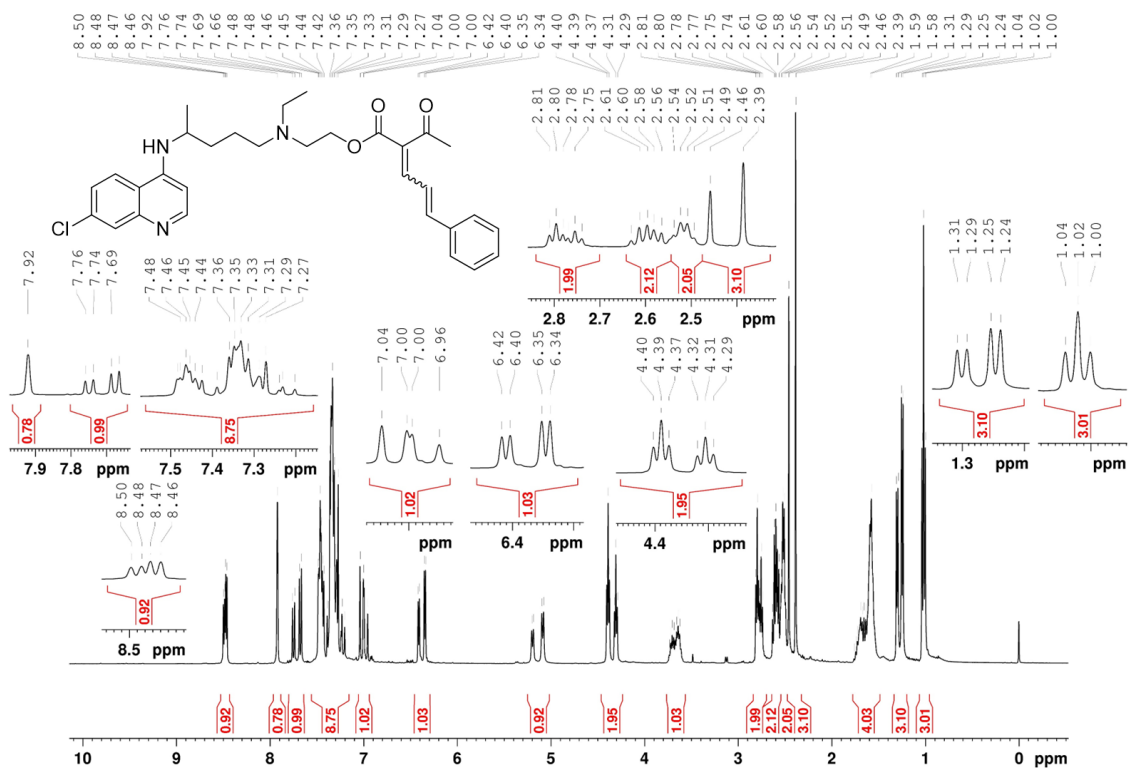

Figure S29.  $^1\text{H}$  NMR (400 MHz,  $\text{CDCl}_3$ ) spectrum of (*E/Z*)-7m.

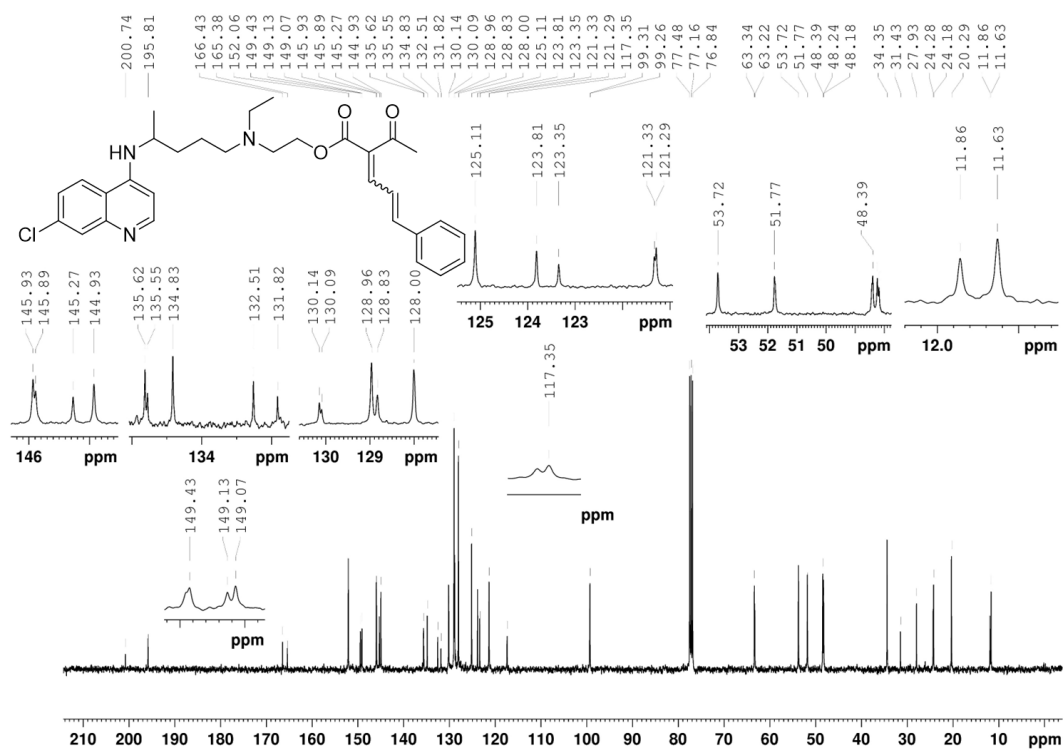

Figure S30.  $^{13}\text{C}$  NMR (100 MHz,  $\text{CDCl}_3$ ) spectrum of (*E/Z*)-7m.

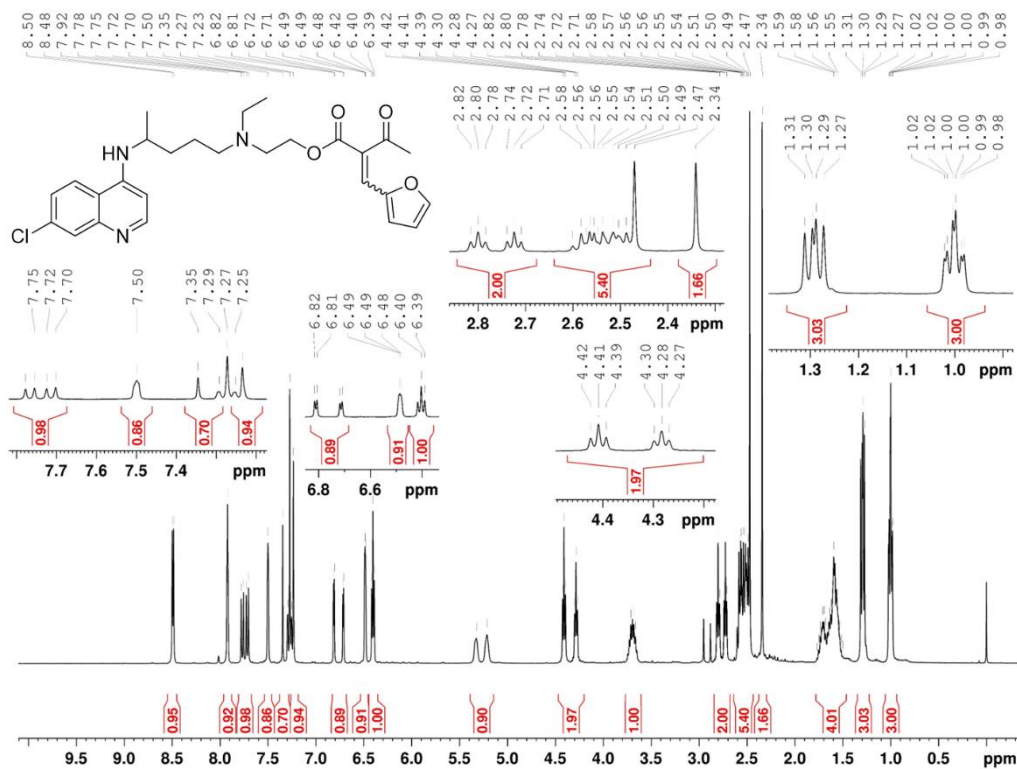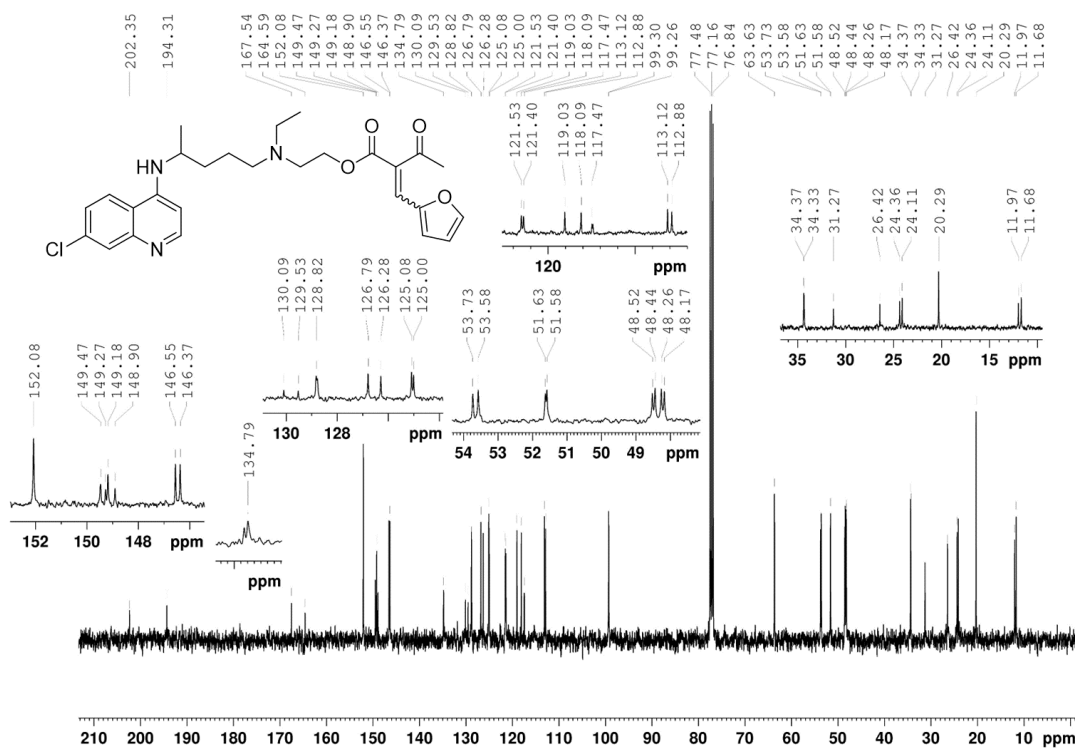

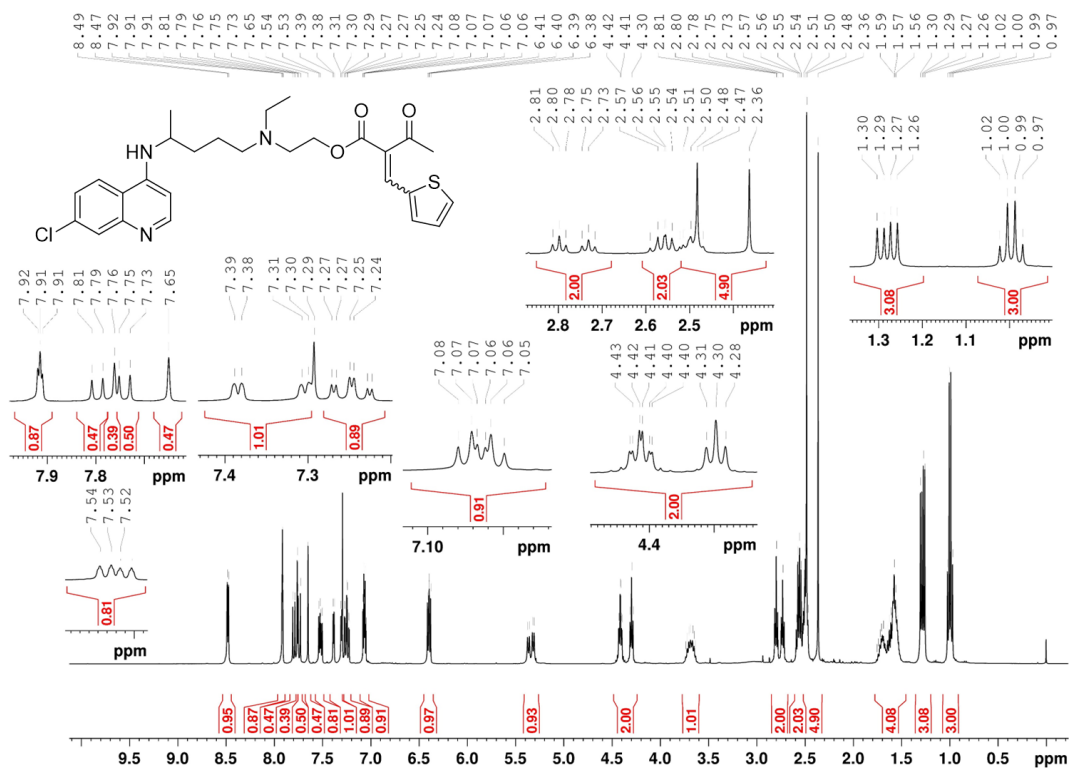

Figure S33. <sup>1</sup>H NMR (400 MHz, CDCl<sub>3</sub>) spectrum of (E/Z)-7o.

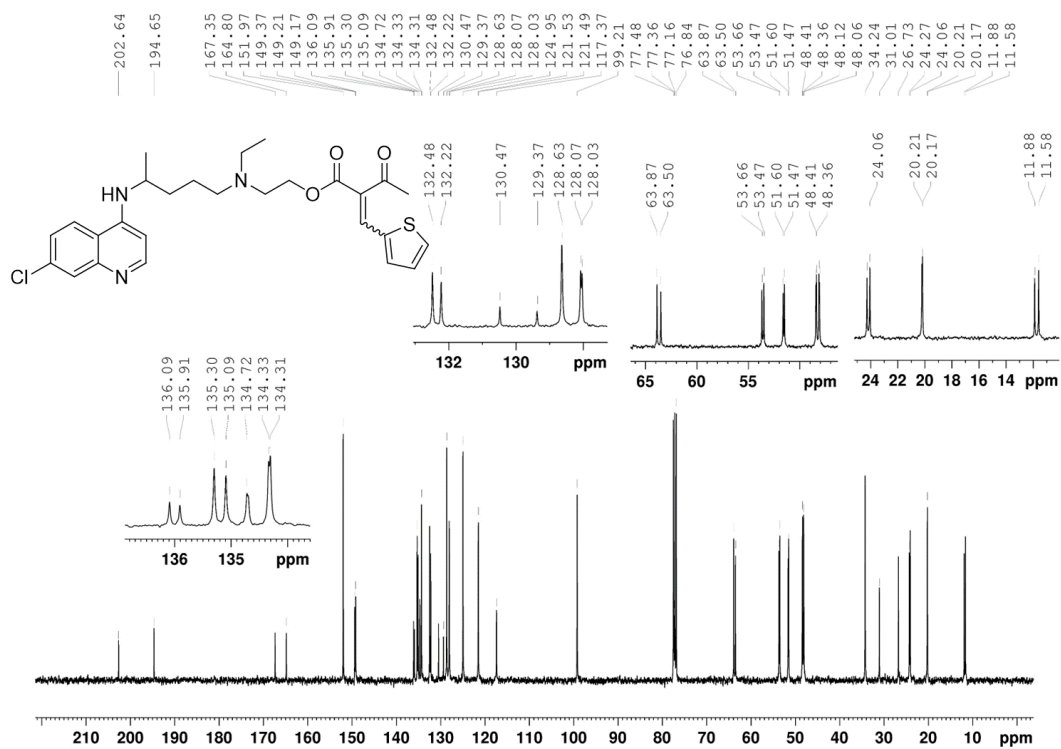

Figure S34. <sup>13</sup>C NMR (100 MHz, CDCl<sub>3</sub>) spectrum of (E/Z)-7o.

## Selected HSQC and HMBC spectra

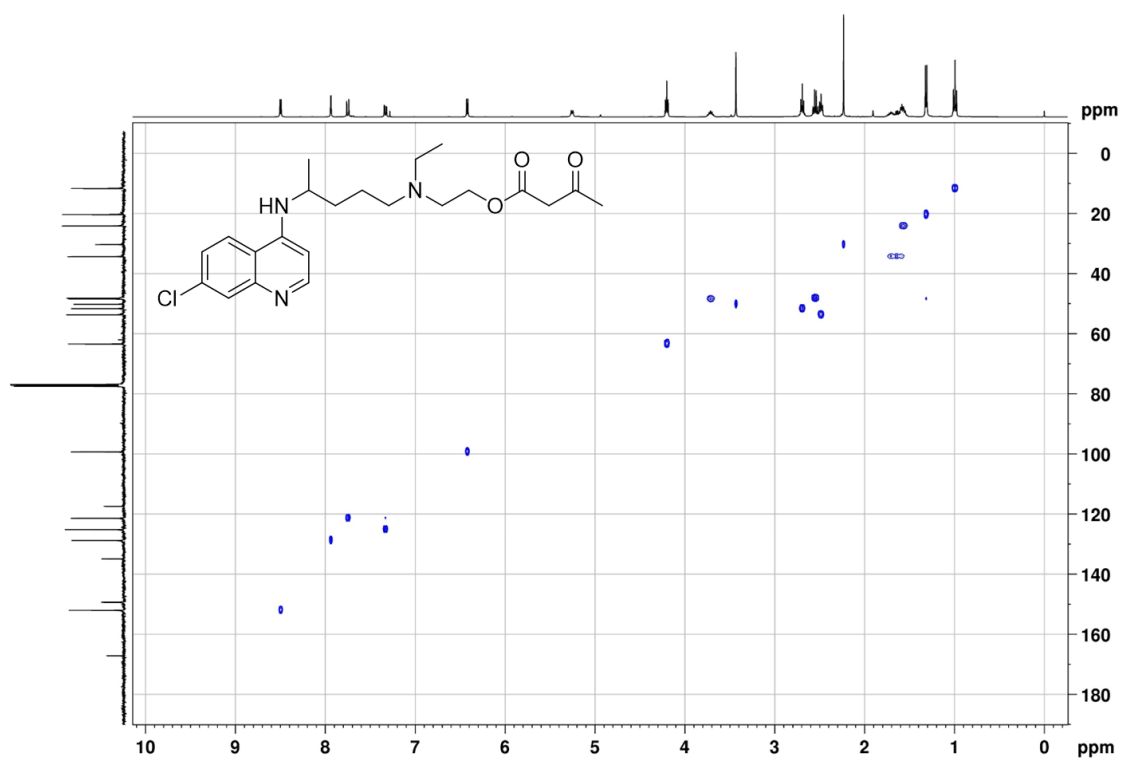

**Figure S35.** Heteronuclear correlation of a  $^1\text{H}$ - $^{13}\text{C}$  bond (HSQC) in  $\text{CDCl}_3$  of **5**.

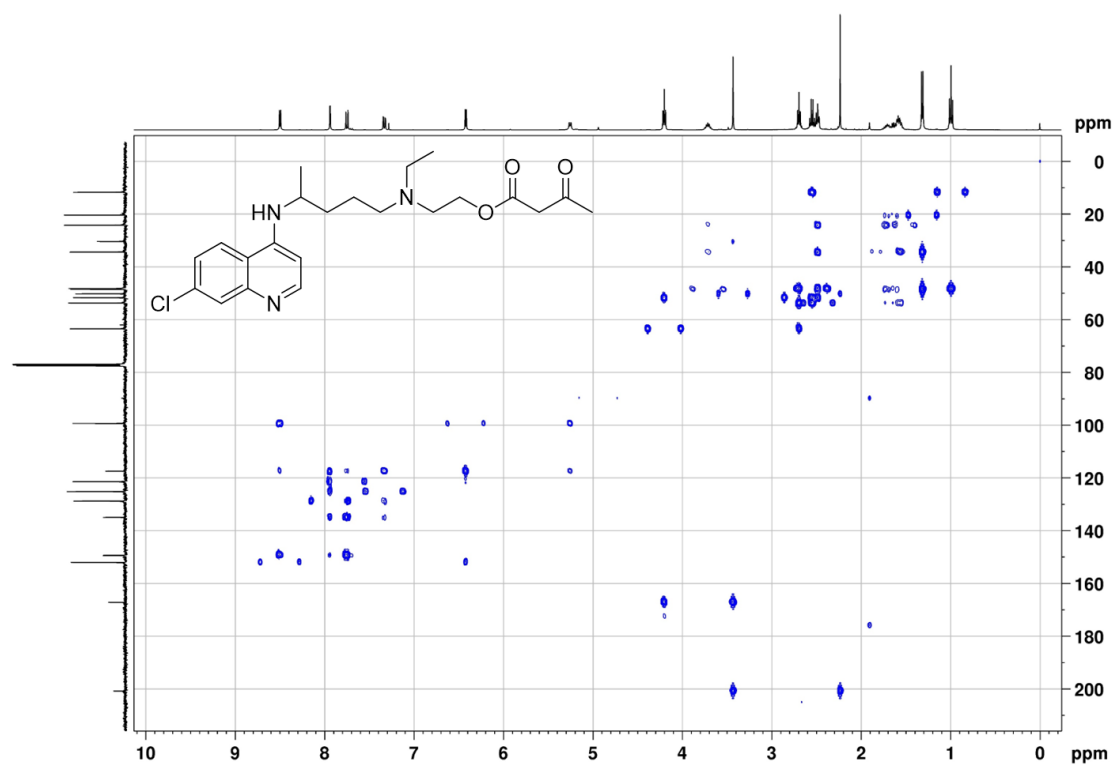

**Figure S36.** Heteronuclear correlation of a  $^1\text{H}$ - $^{13}\text{C}$  bond (HMBC) in  $\text{CDCl}_3$  of **5**.

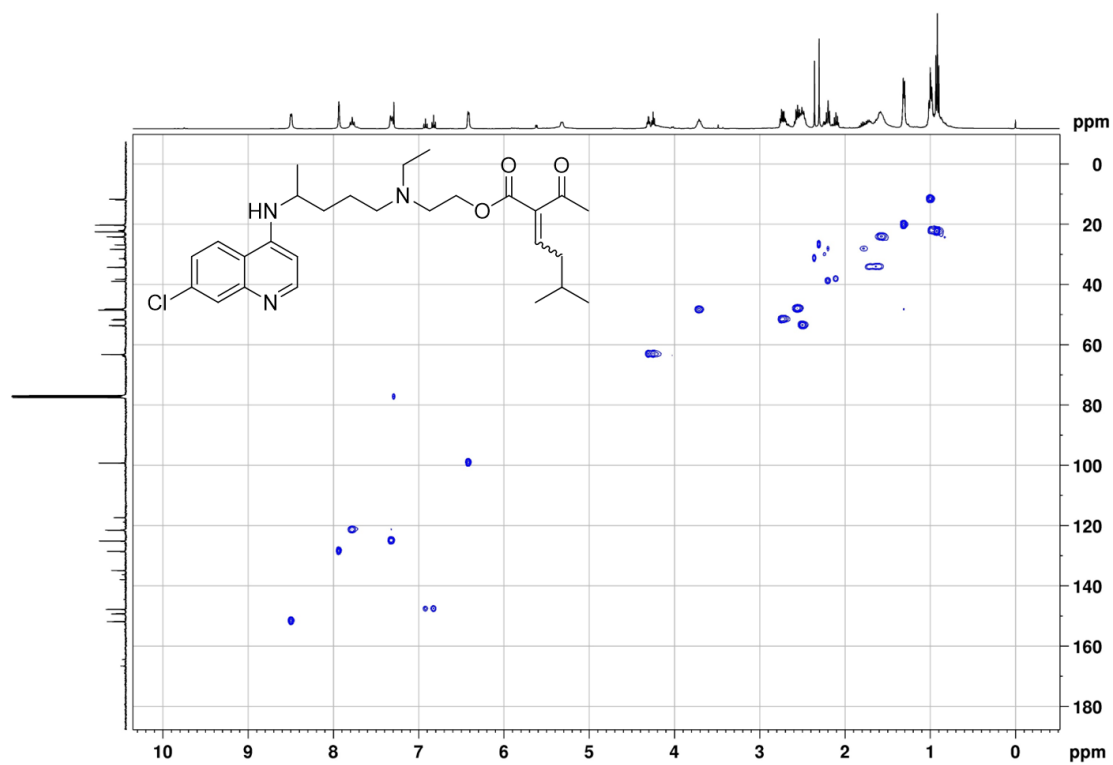

**Figure S37.** Heteronuclear correlation of a  $^1\text{H}$ - $^{13}\text{C}$  bond (HSQC) in  $\text{CDCl}_3$  of (*E/Z*)-**7a**.

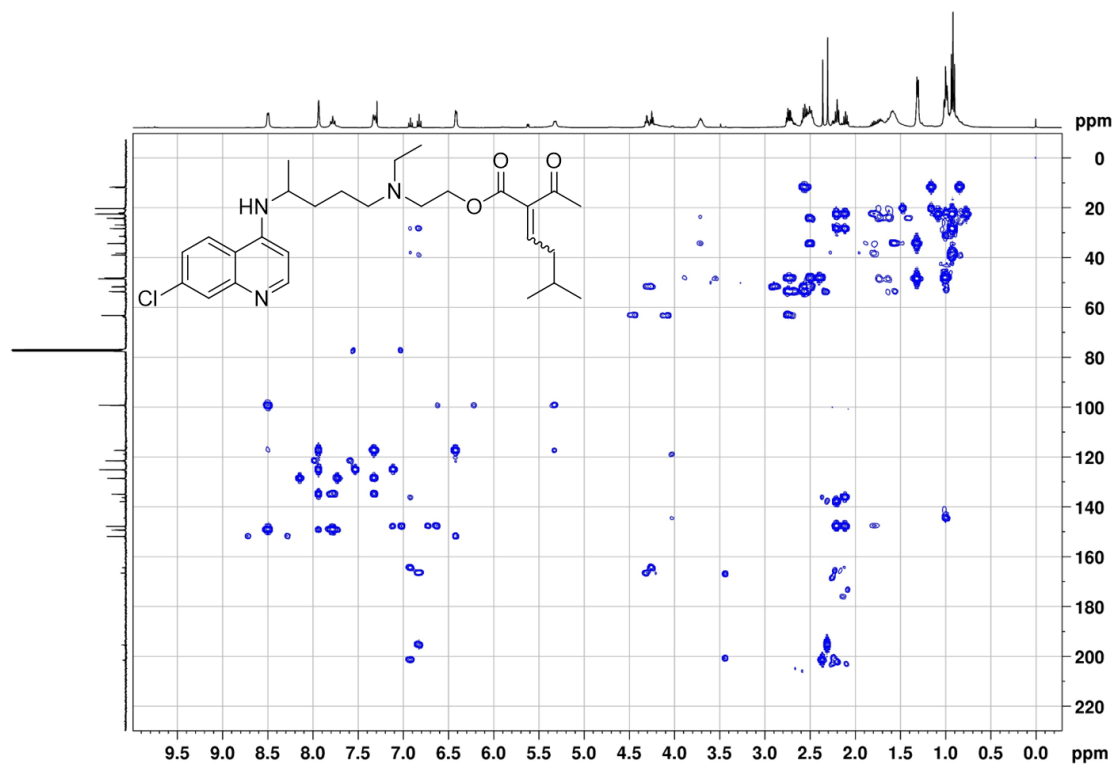

**Figure S38.** Heteronuclear correlation of a  $^1\text{H}$ - $^{13}\text{C}$  bond (HMBC) in  $\text{CDCl}_3$  of (*E/Z*)-**7a**.

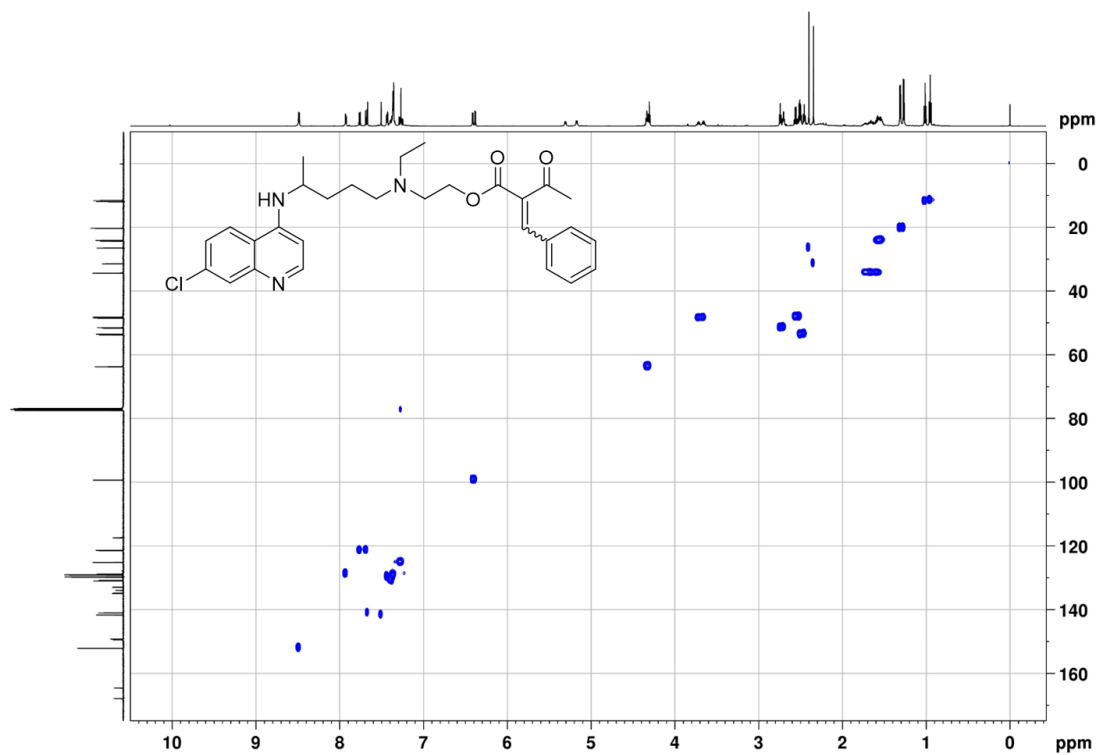

**Figure S39.** Heteronuclear correlation of a <sup>1</sup>H-<sup>13</sup>C bond (HSQC) in CDCl<sub>3</sub> of *(E/Z)*-7b.

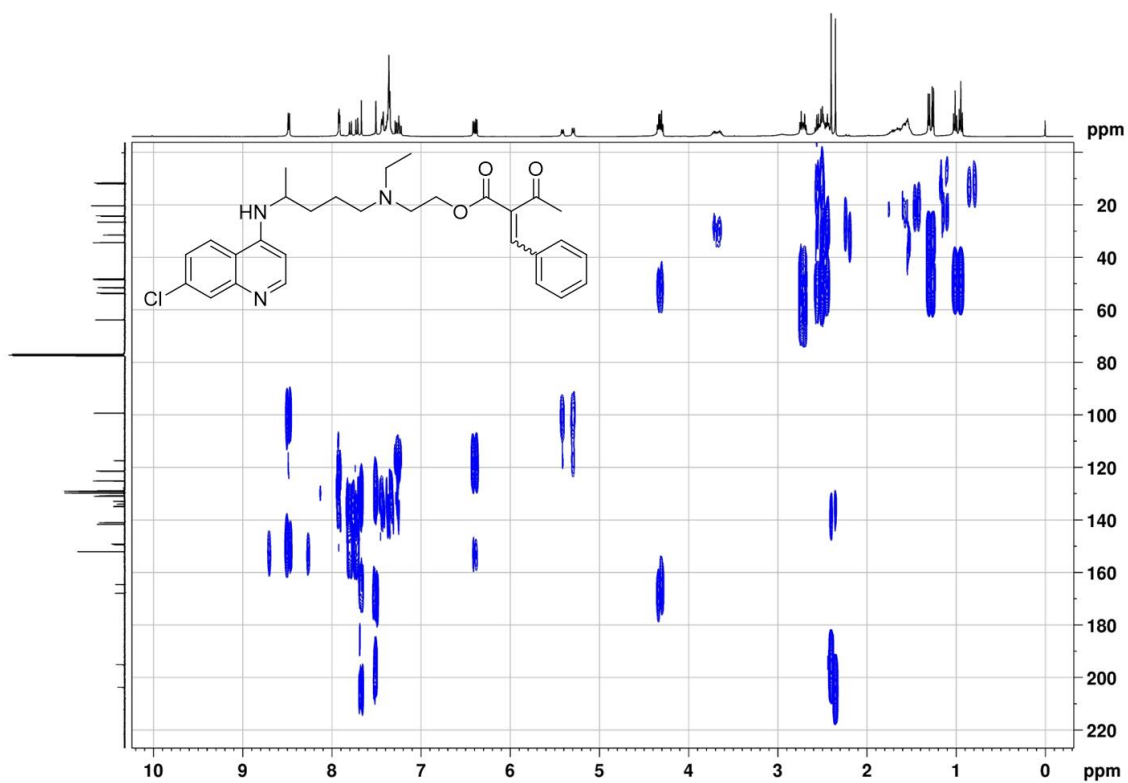

**Figure S40.** Heteronuclear correlation of a <sup>1</sup>H-<sup>13</sup>C bond (HMBC) in CDCl<sub>3</sub> of *(E/Z)*-7b.

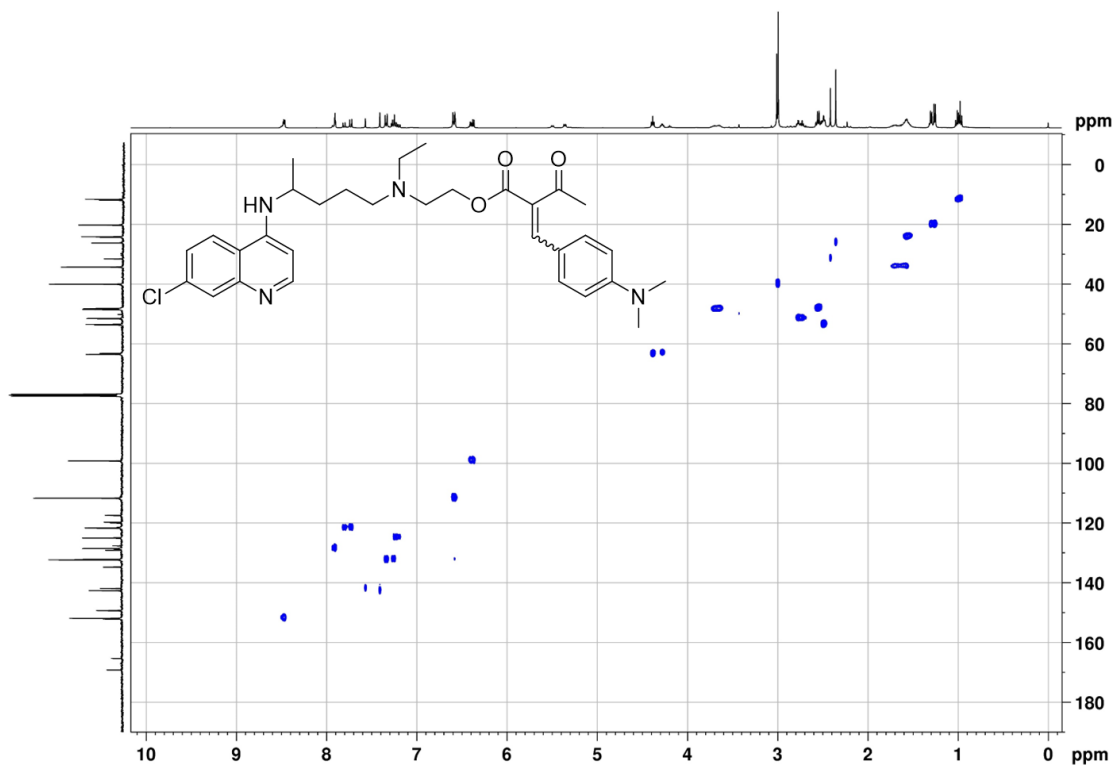

**Figure S41.** Heteronuclear correlation of a  $^1\text{H}$ - $^{13}\text{C}$  bond (HSQC) in  $\text{CDCl}_3$  of (*E/Z*)-**7c**.

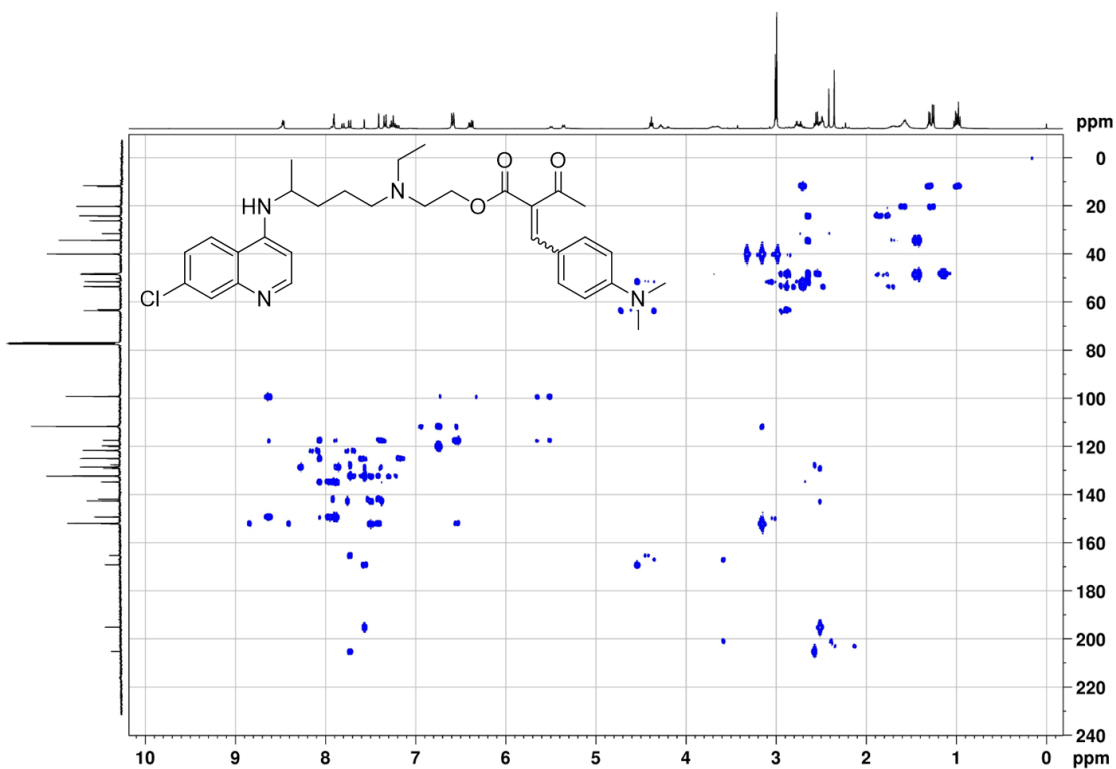

**Figure S42.** Heteronuclear correlation of a  $^1\text{H}$ - $^{13}\text{C}$  bond (HMBC) in  $\text{CDCl}_3$  of (*E/Z*)-**7c**.

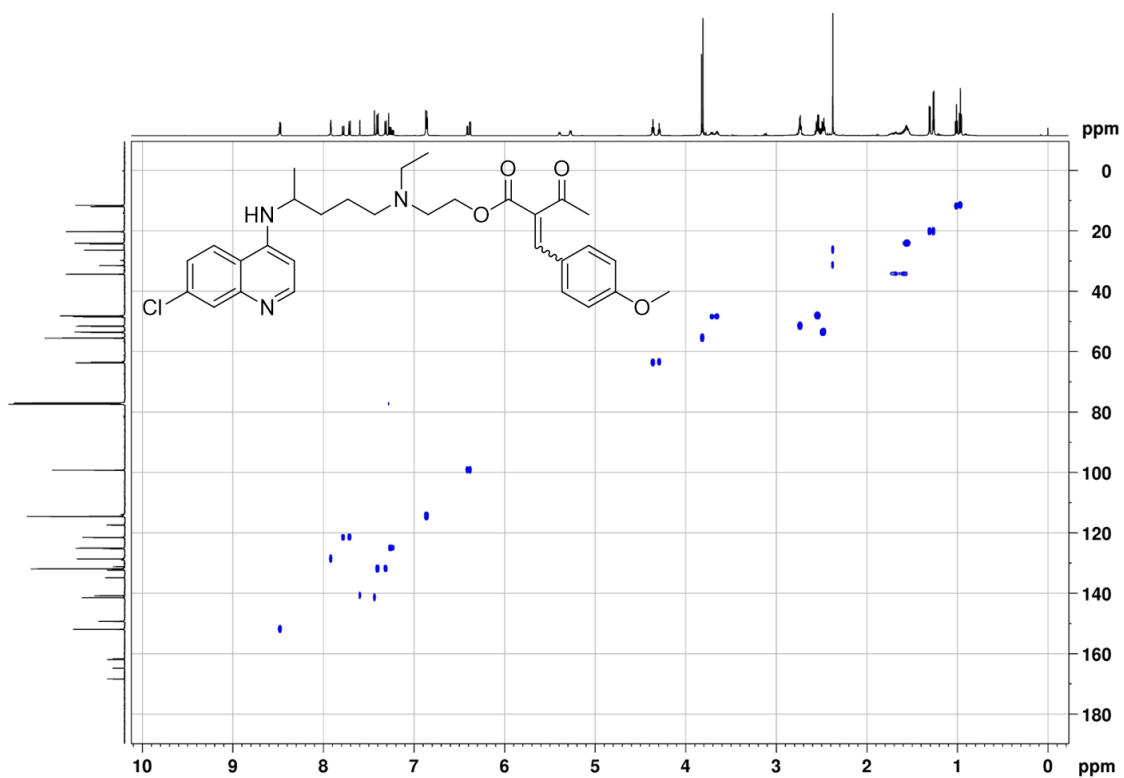

**Figure S43.** Heteronuclear correlation of a  $^1\text{H}$ - $^{13}\text{C}$  bond (HSQC) in  $\text{CDCl}_3$  of (*E/Z*)-**7d**.

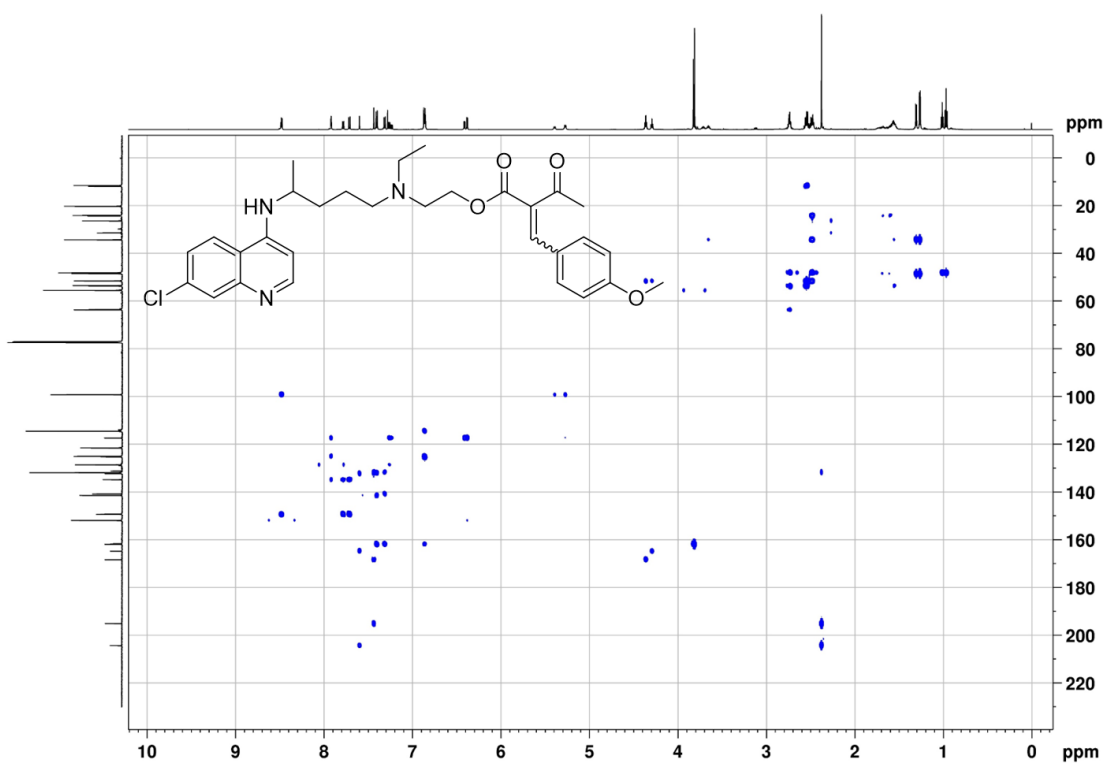

**Figure S44.** Heteronuclear correlation of a  $^1\text{H}$ - $^{13}\text{C}$  bond (HMBC) in  $\text{CDCl}_3$  of (*E/Z*)-**7d**.



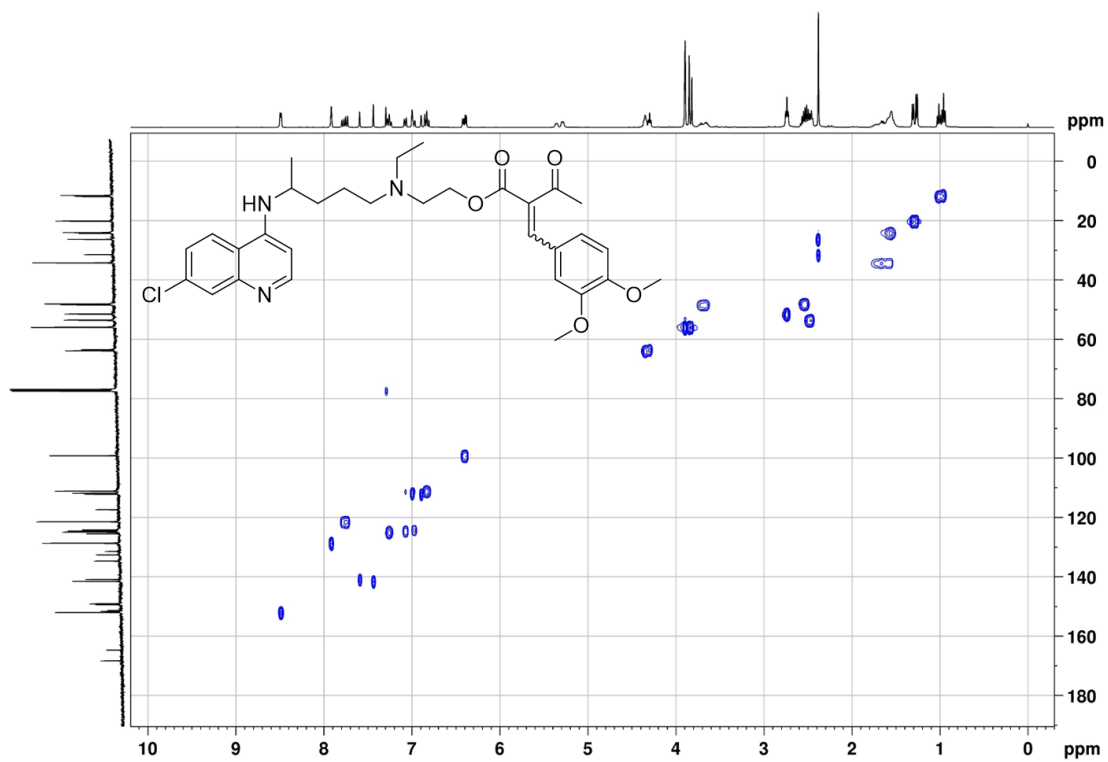

**Figure S45.** Heteronuclear correlation of a <sup>1</sup>H-<sup>13</sup>C bond (HSQC) in CDCl<sub>3</sub> of *(E/Z)*-7e.

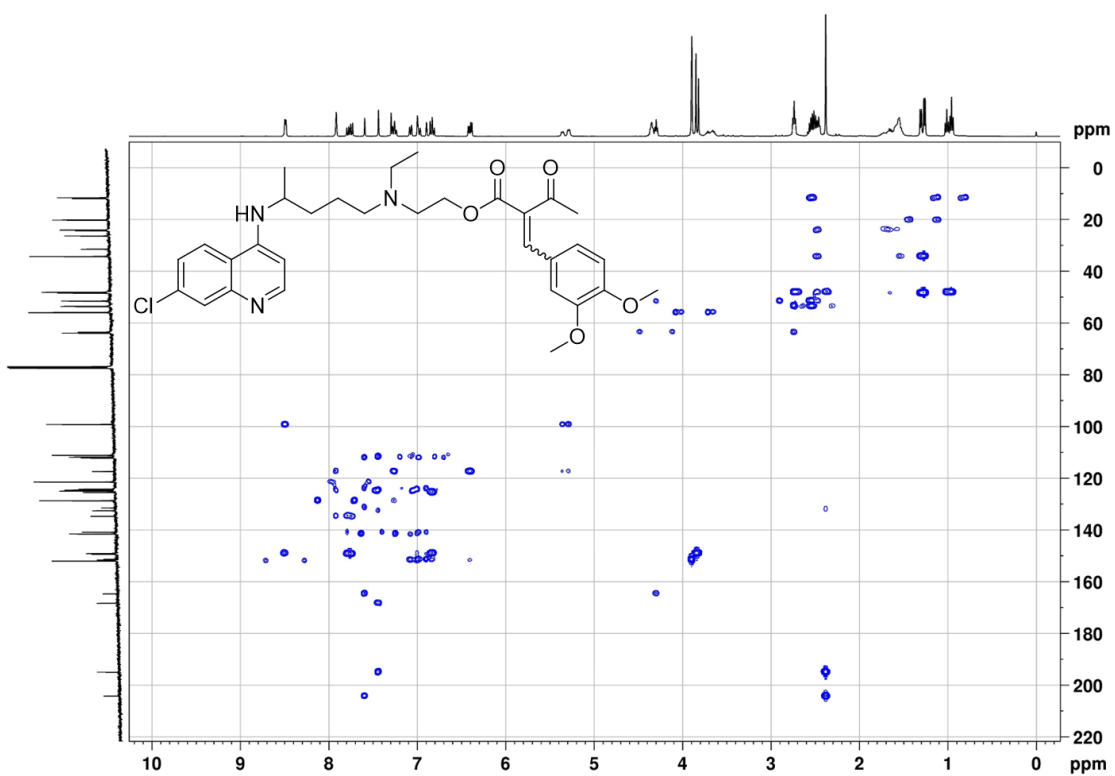

**Figure S46.** Heteronuclear correlation of a <sup>1</sup>H-<sup>13</sup>C bond (HMBC) in CDCl<sub>3</sub> of *(E/Z)*-7e.

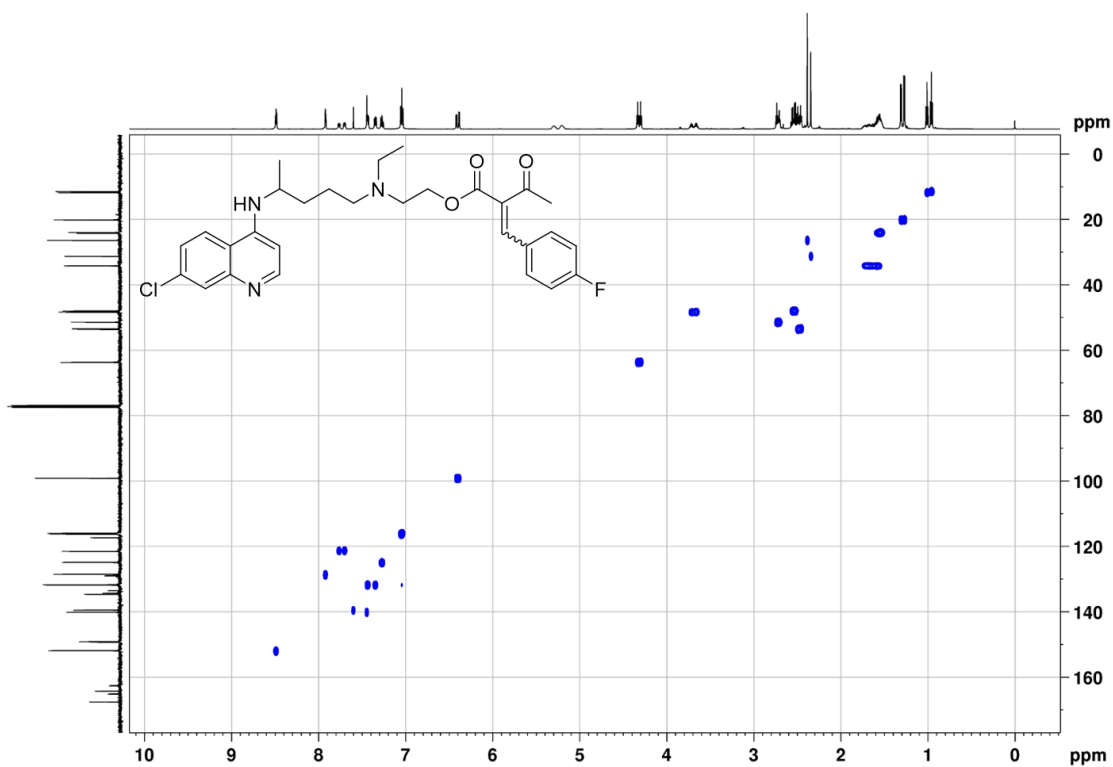

**Figure S47.** Heteronuclear correlation of a <sup>1</sup>H-<sup>13</sup>C bond (HSQC) in CDCl<sub>3</sub> of (E/Z)-7f.

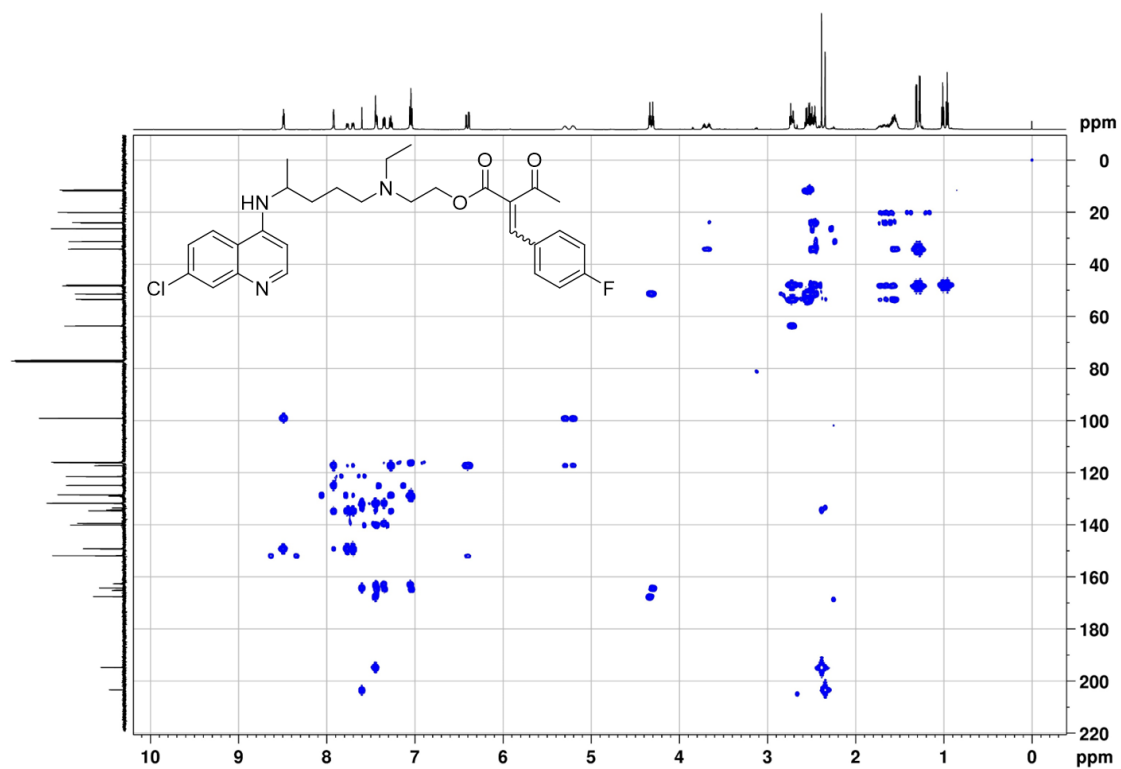

**Figure S48.** Heteronuclear correlation of a <sup>1</sup>H-<sup>13</sup>C bond (HMBC) in CDCl<sub>3</sub> of (E/Z)-7f.

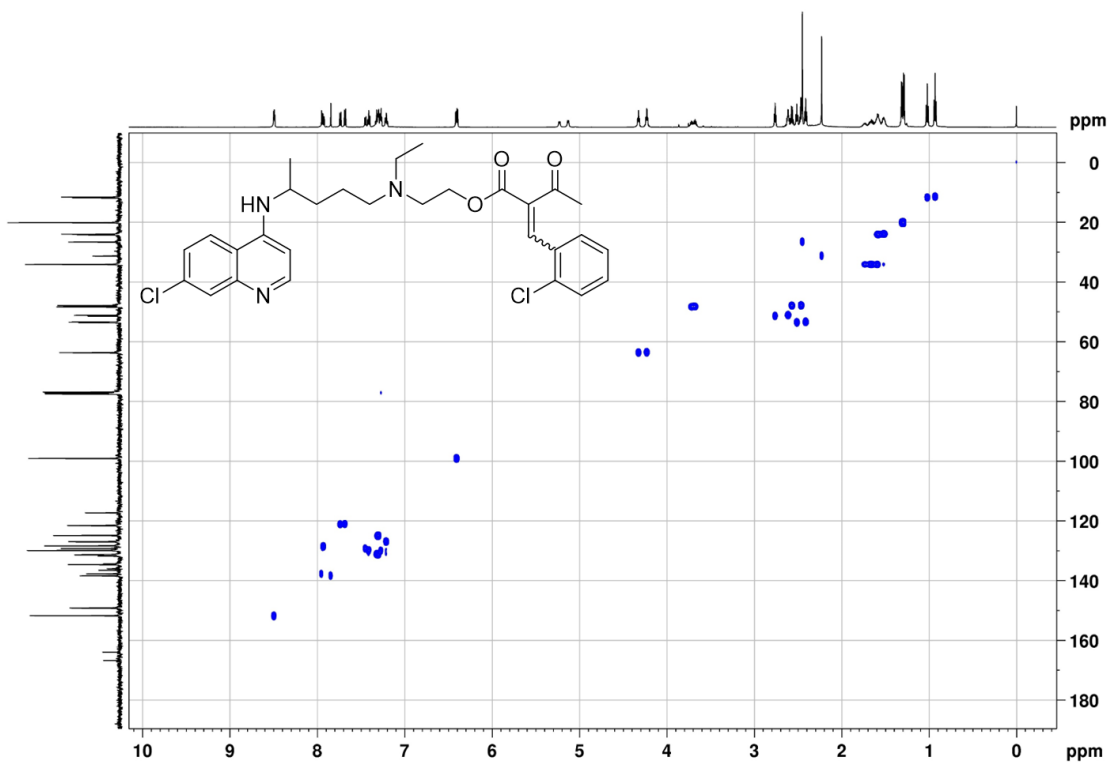

**Figure S49.** Heteronuclear correlation of a <sup>1</sup>H-<sup>13</sup>C bond (HSQC) in CDCl<sub>3</sub> of *(E/Z)*-7g.

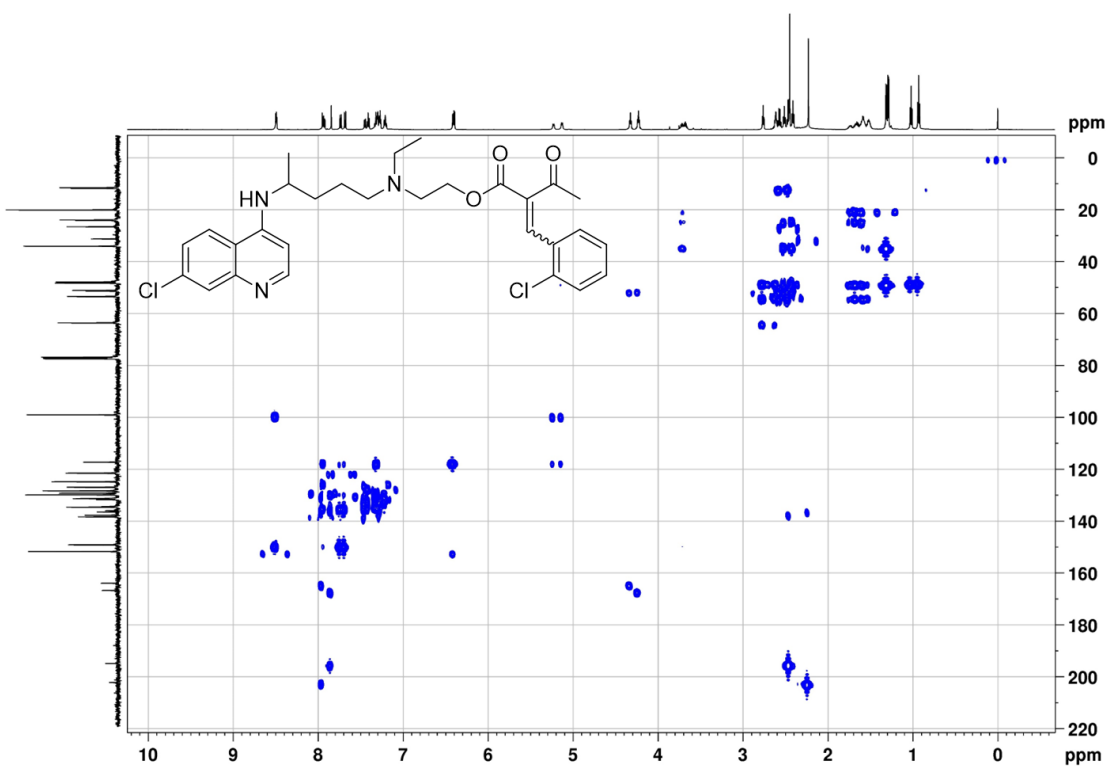

**Figure S50.** Heteronuclear correlation of a <sup>1</sup>H-<sup>13</sup>C bond (HMBC) in CDCl<sub>3</sub> of *(E/Z)*-7g.

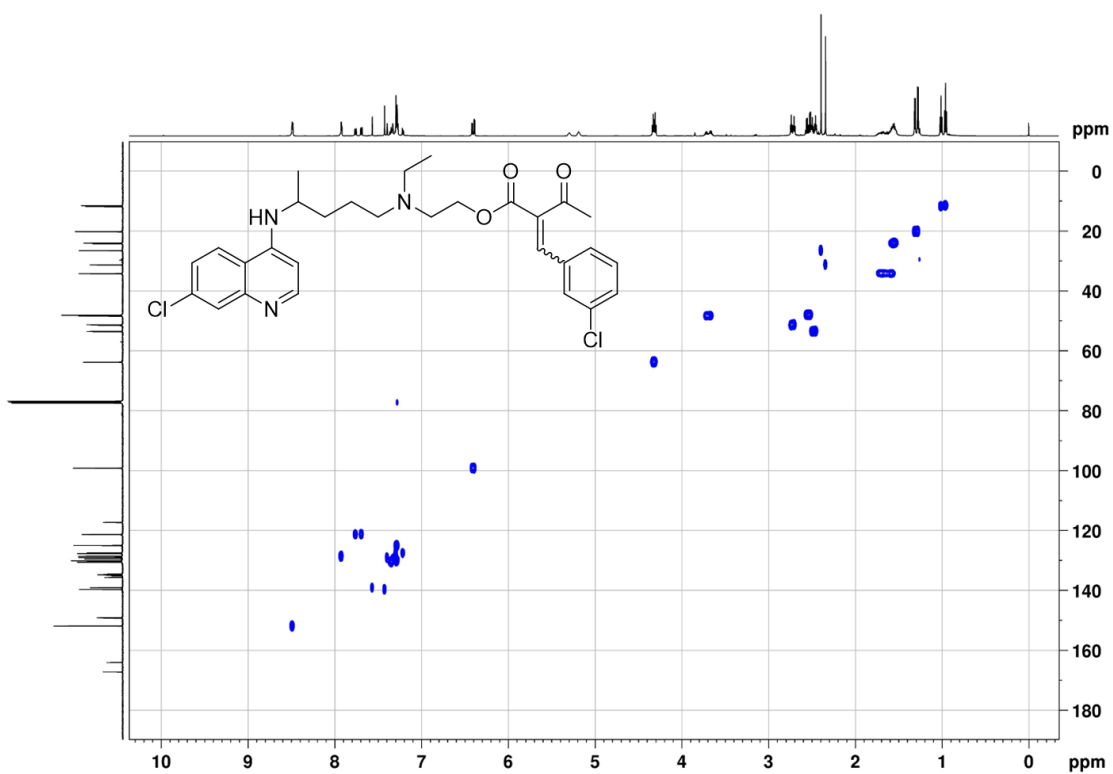

**Figure S51.** Heteronuclear correlation of a  $^1\text{H}$ - $^{13}\text{C}$  bond (HSQC) in  $\text{CDCl}_3$  of (*E/Z*)-**7h**.

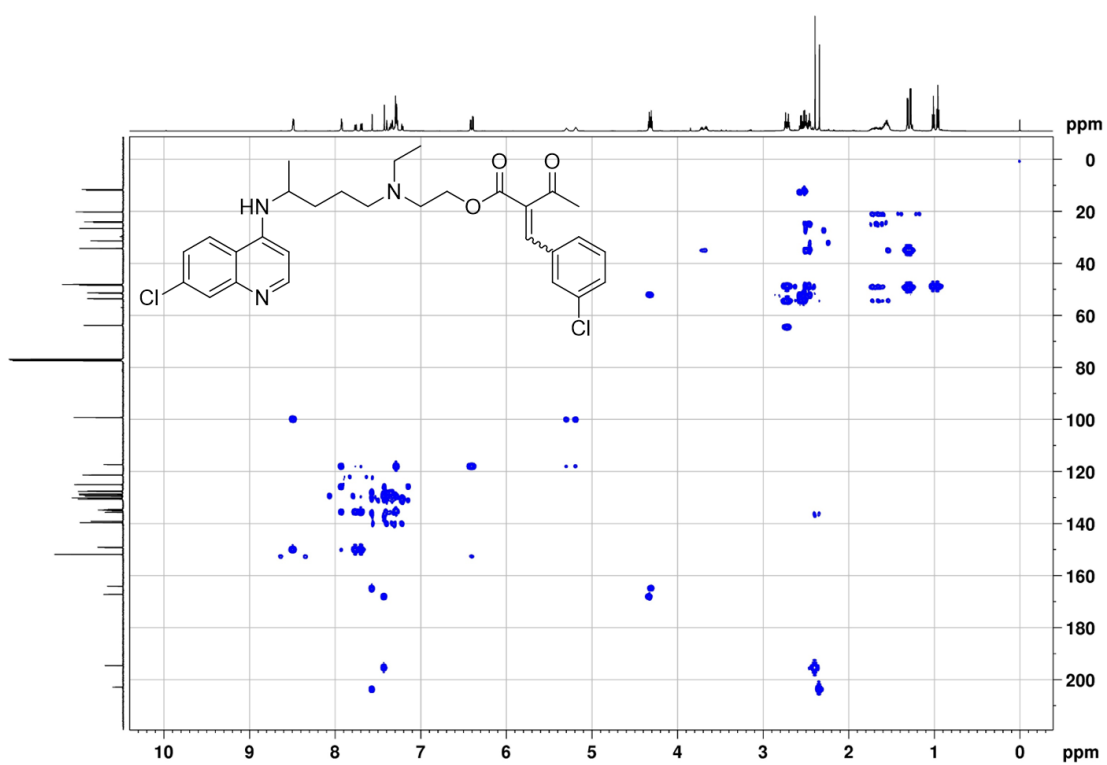

**Figure S52.** Heteronuclear correlation of a  $^1\text{H}$ - $^{13}\text{C}$  bond (HMBC) in  $\text{CDCl}_3$  of (*E/Z*)-**7h**.

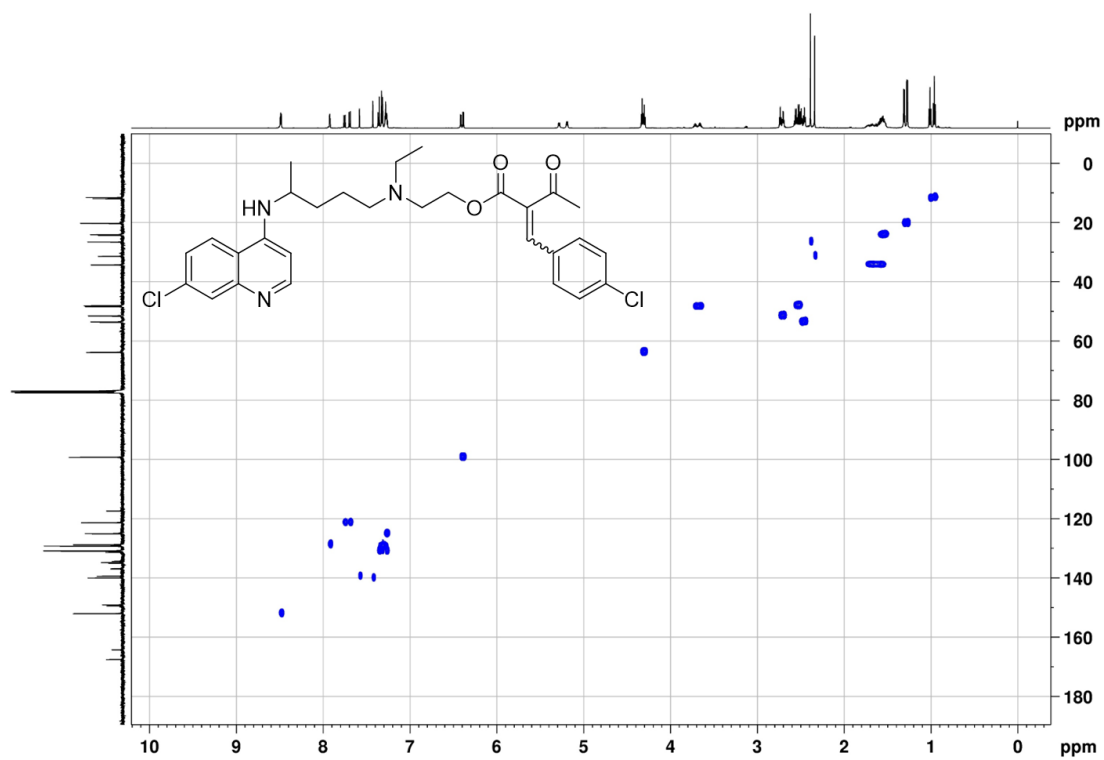

**Figure S53.** Heteronuclear correlation of a  $^1\text{H}$ - $^{13}\text{C}$  bond (HSQC) in  $\text{CDCl}_3$  of (*E/Z*)-**7i**.

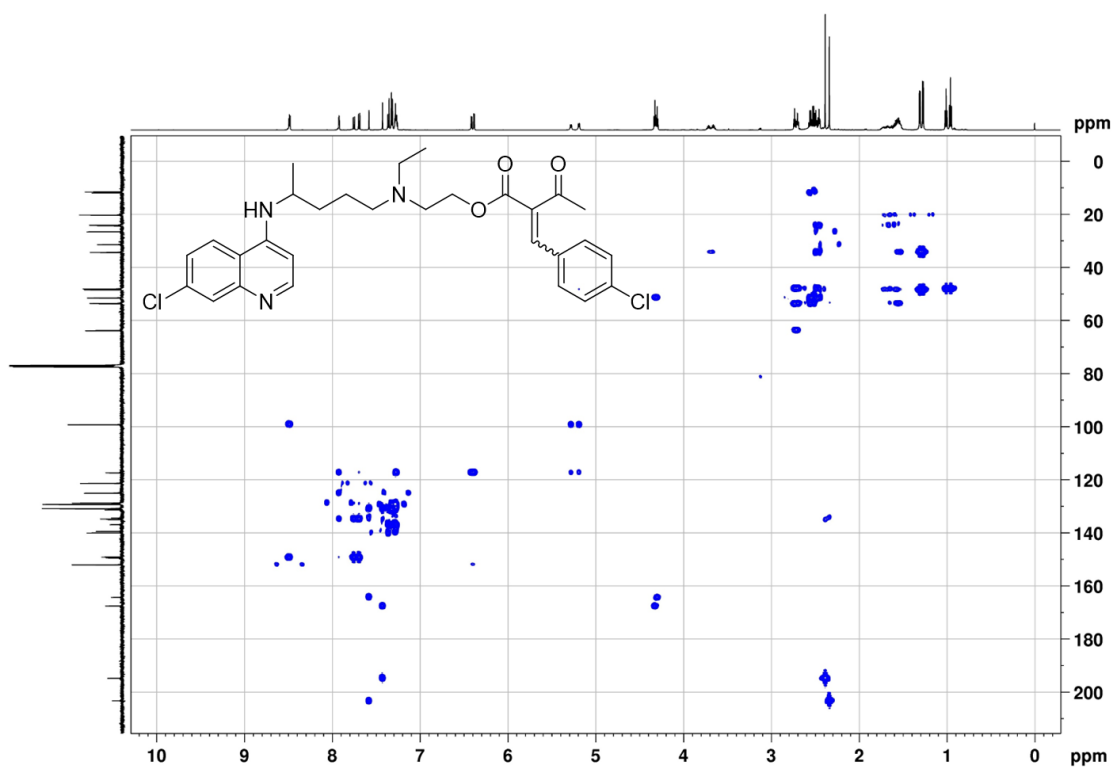

**Figure S54.** Heteronuclear correlation of a  $^1\text{H}$ - $^{13}\text{C}$  bond (HMBC) in  $\text{CDCl}_3$  of (*E/Z*)-**7i**.

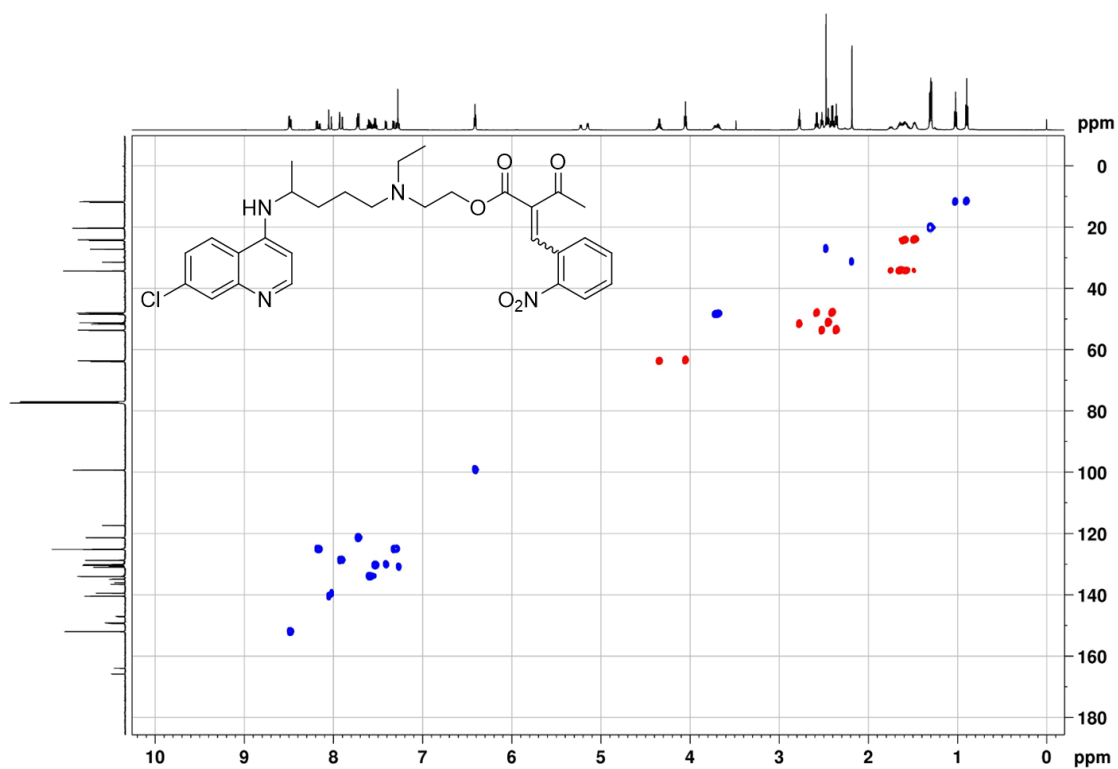

**Figure S55.** Heteronuclear correlation of a <sup>1</sup>H-<sup>13</sup>C bond (HSQC) in CDCl<sub>3</sub> of *(E/Z)*-7j.

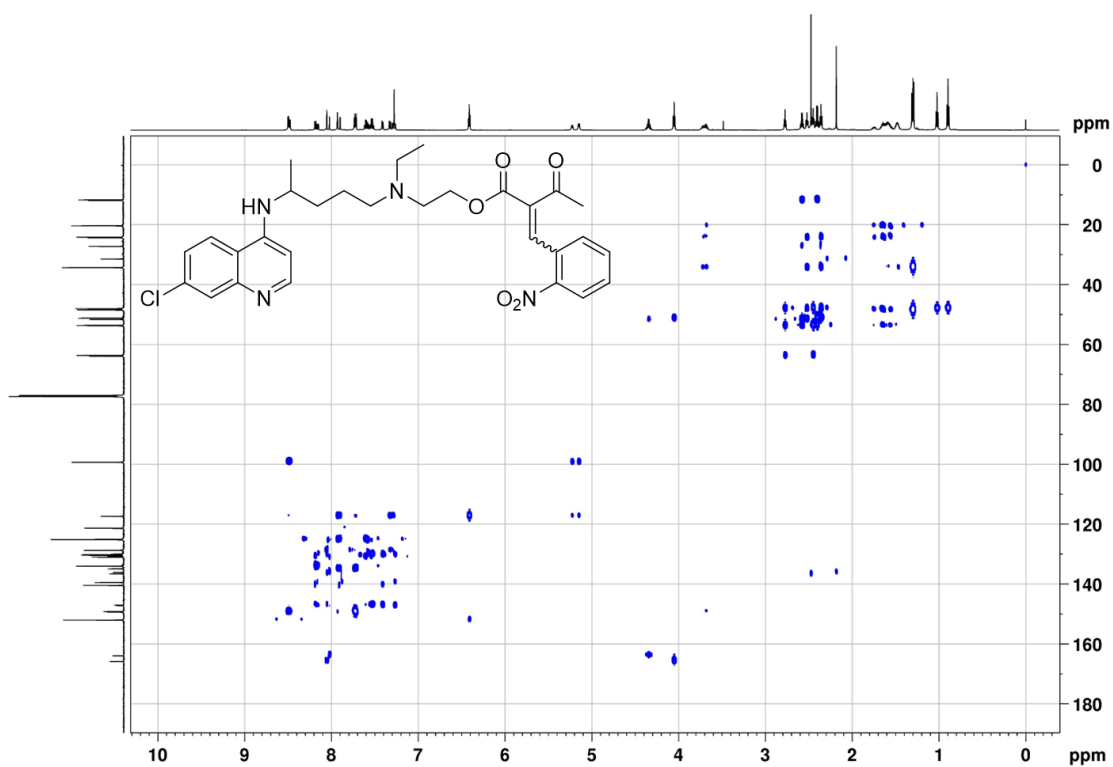

**Figure S56.** Heteronuclear correlation of a <sup>1</sup>H-<sup>13</sup>C bond (HMBC) in CDCl<sub>3</sub> of *(E/Z)*-7j.

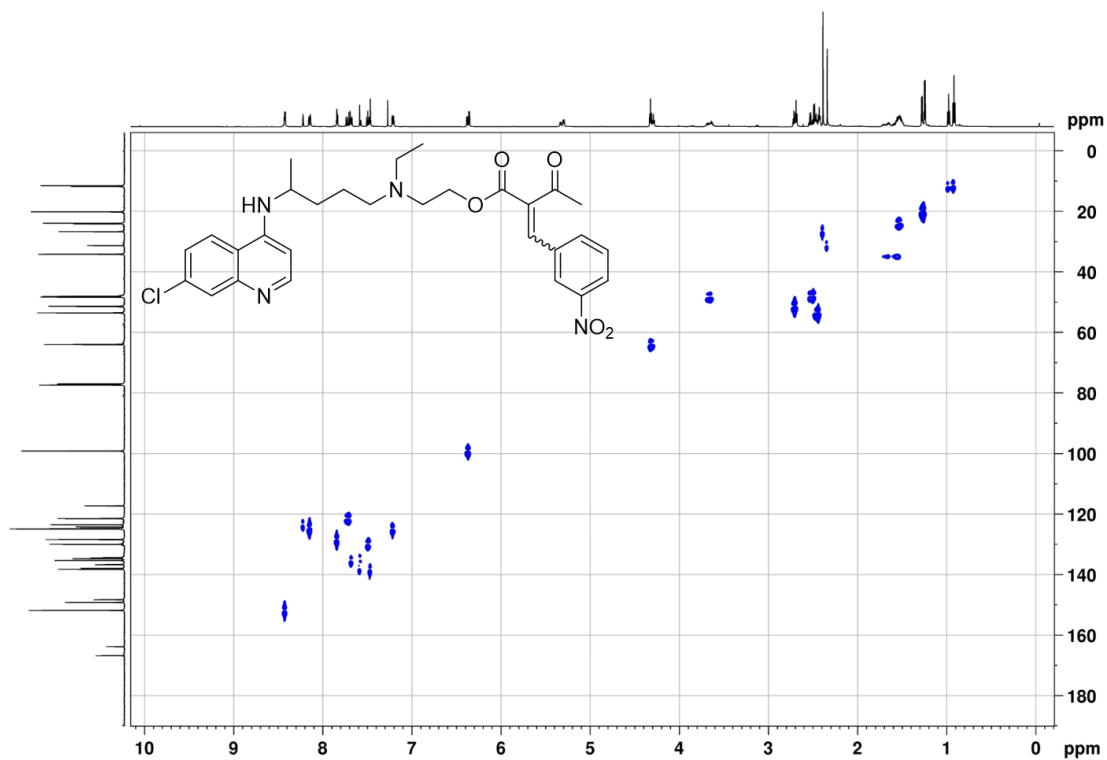

**Figure S57.** Heteronuclear correlation of a  $^1\text{H}$ - $^{13}\text{C}$  bond (HSQC) in  $\text{CDCl}_3$  of  $(E/Z)$ -7k.

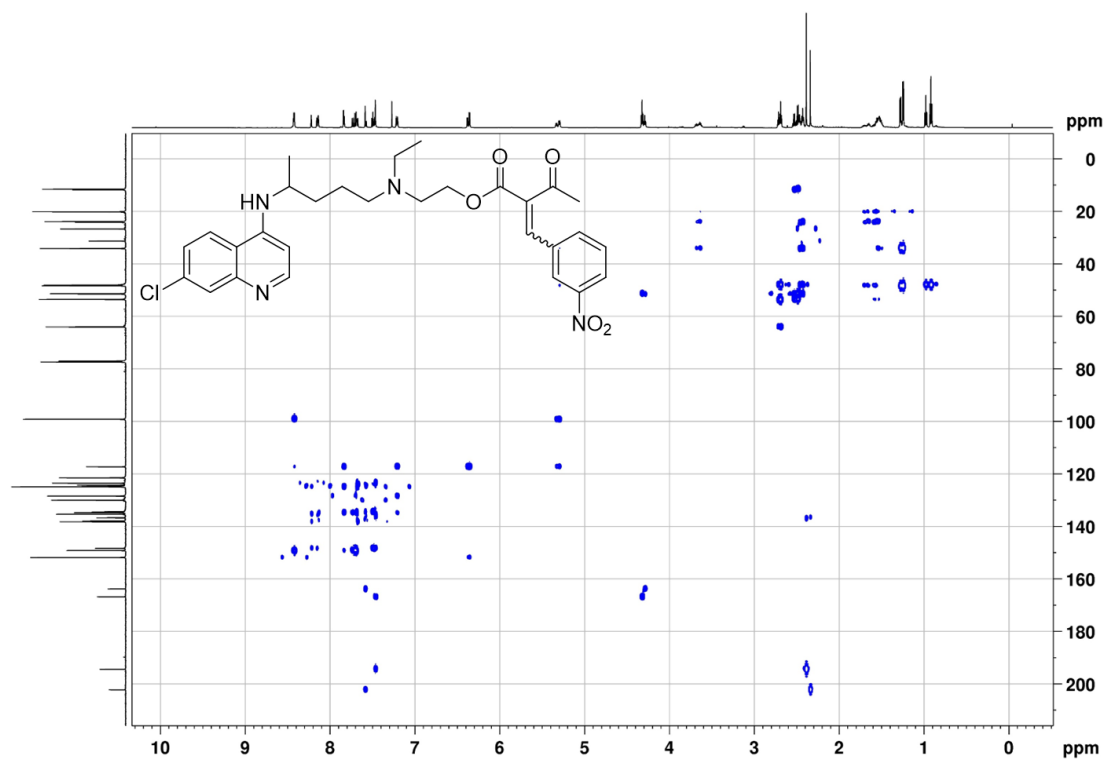

**Figure S58.** Heteronuclear correlation of a  $^1\text{H}$ - $^{13}\text{C}$  bond (HMBC) in  $\text{CDCl}_3$  of  $(E/Z)$ -7k.

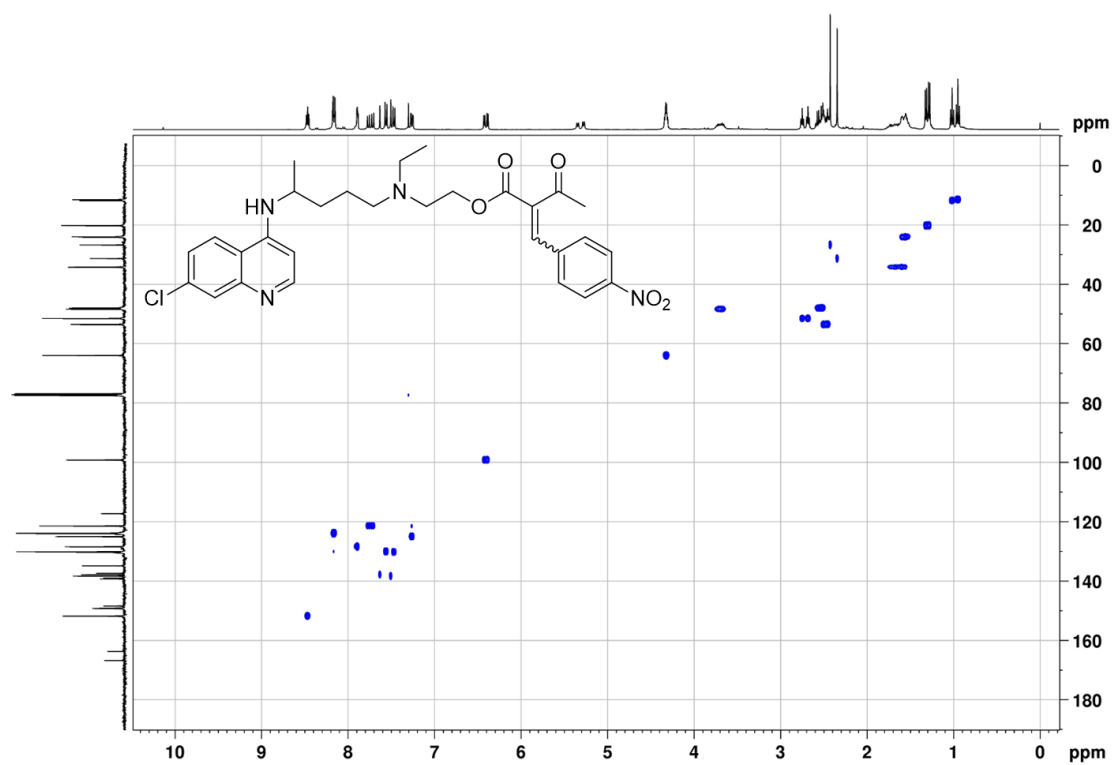

**Figure S59.** Heteronuclear correlation of a  $^1\text{H}$ - $^{13}\text{C}$  bond (HSQC) in  $\text{CDCl}_3$  of (*E/Z*)-**71**.

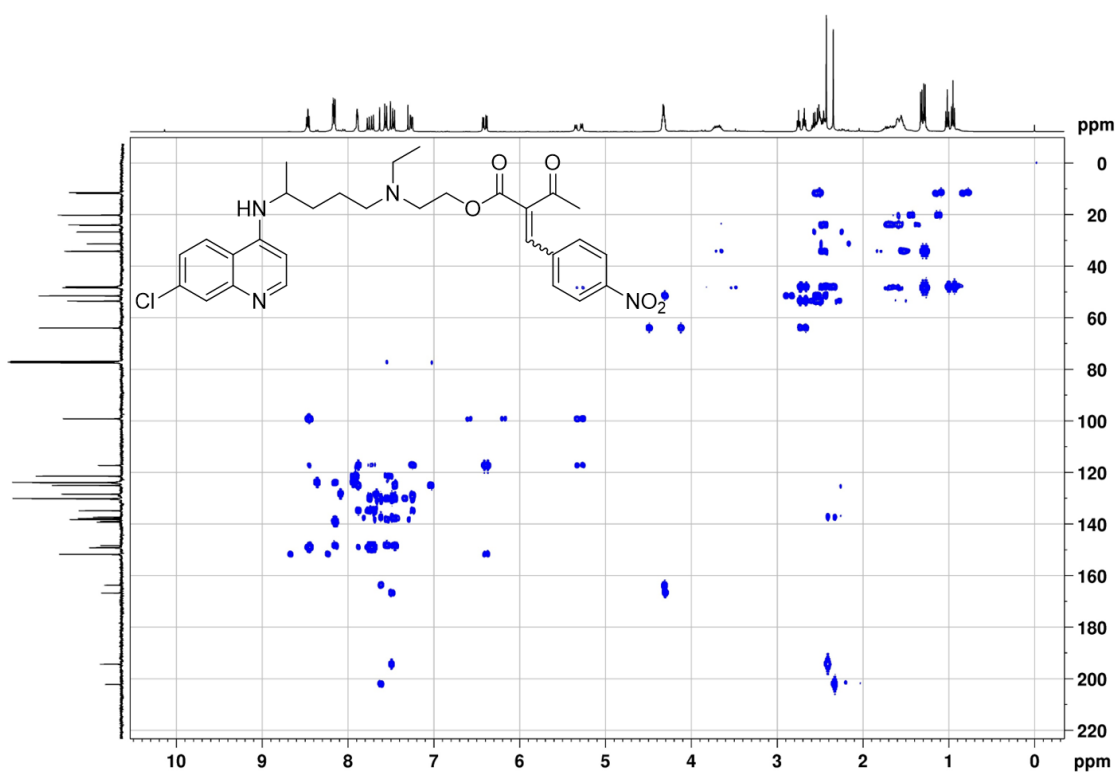

**Figure S60.** Heteronuclear correlation of a  $^1\text{H}$ - $^{13}\text{C}$  bond (HMBC) in  $\text{CDCl}_3$  of (*E/Z*)-**71**.



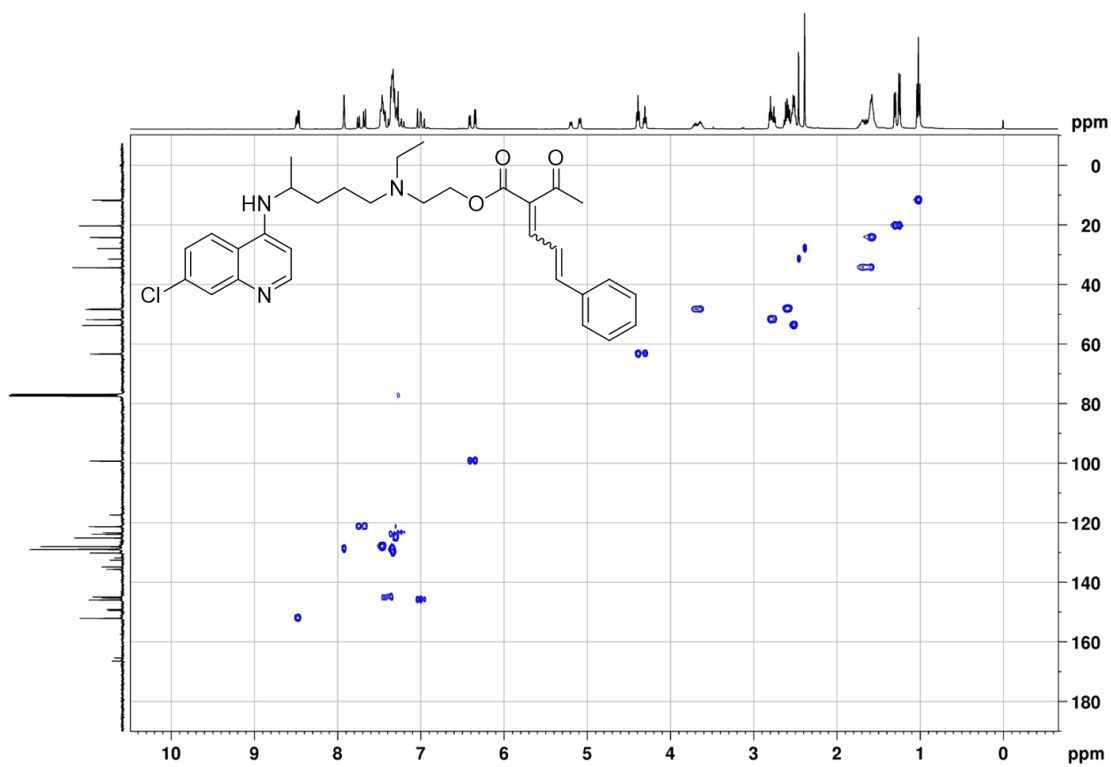

**Figure S61.** Heteronuclear correlation of a  $^1\text{H}$ - $^{13}\text{C}$  bond (HSQC) in  $\text{CDCl}_3$  of (*E/Z*)-**7m**.

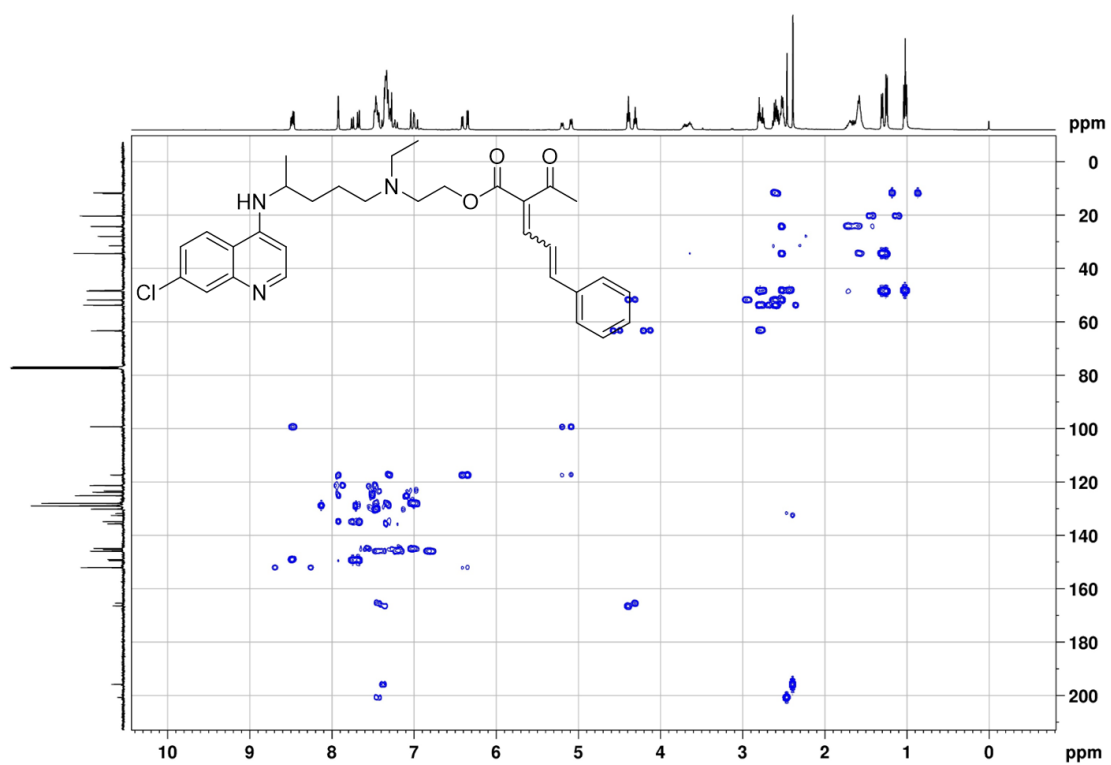

**Figure S62.** Heteronuclear correlation of a  $^1\text{H}$ - $^{13}\text{C}$  bond (HMBC) in  $\text{CDCl}_3$  of (*E/Z*)-**7m**.

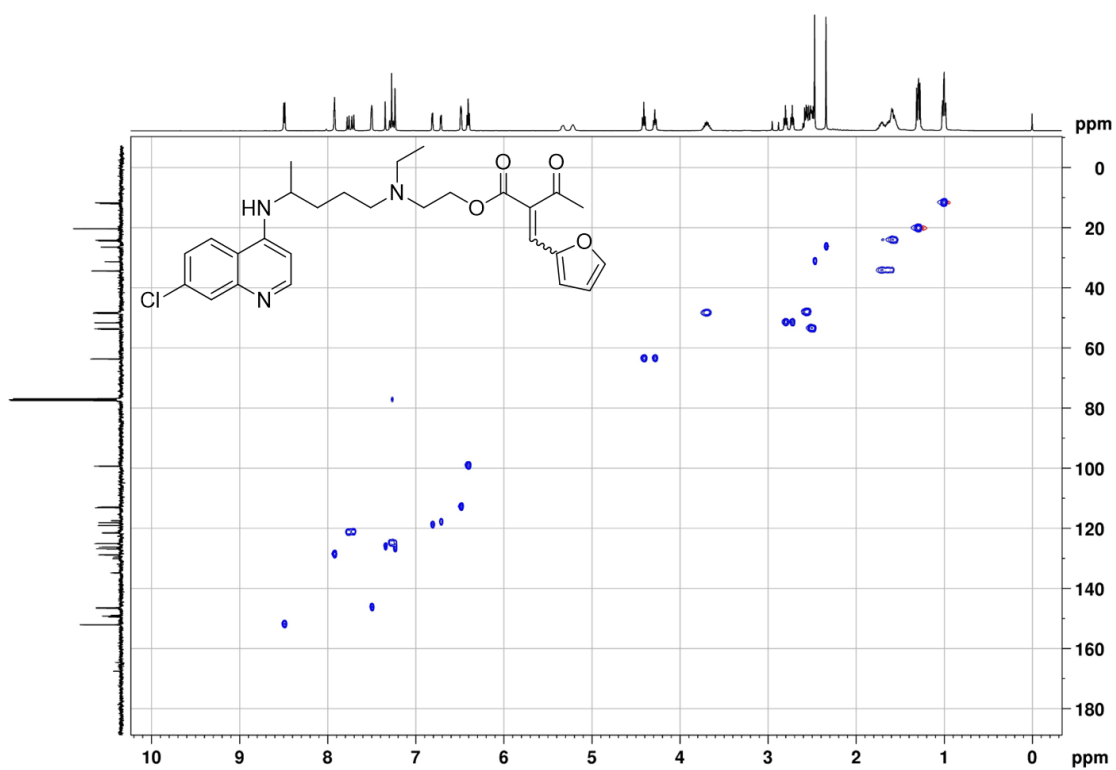

**Figure S63.** Heteronuclear correlation of a <sup>1</sup>H-<sup>13</sup>C bond (HSQC) in CDCl<sub>3</sub> of (E/Z)-7n.

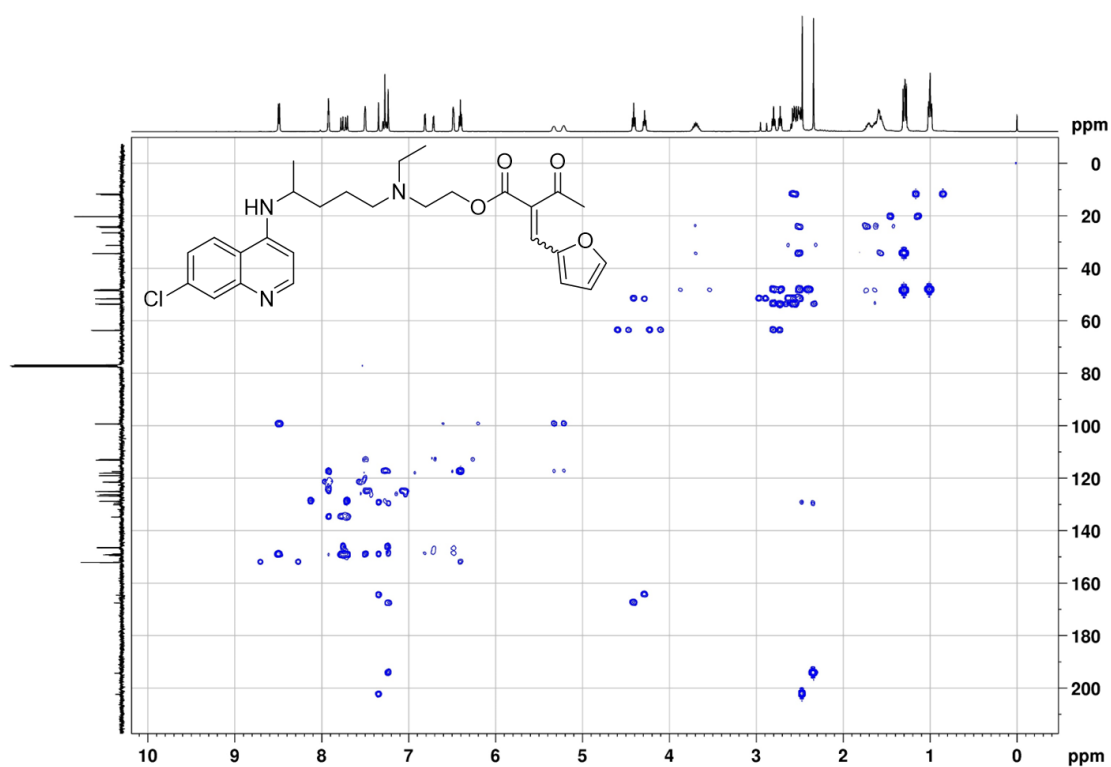

**Figure S64.** Heteronuclear correlation of a <sup>1</sup>H-<sup>13</sup>C bond (HMBC) in CDCl<sub>3</sub> of (E/Z)-7n.

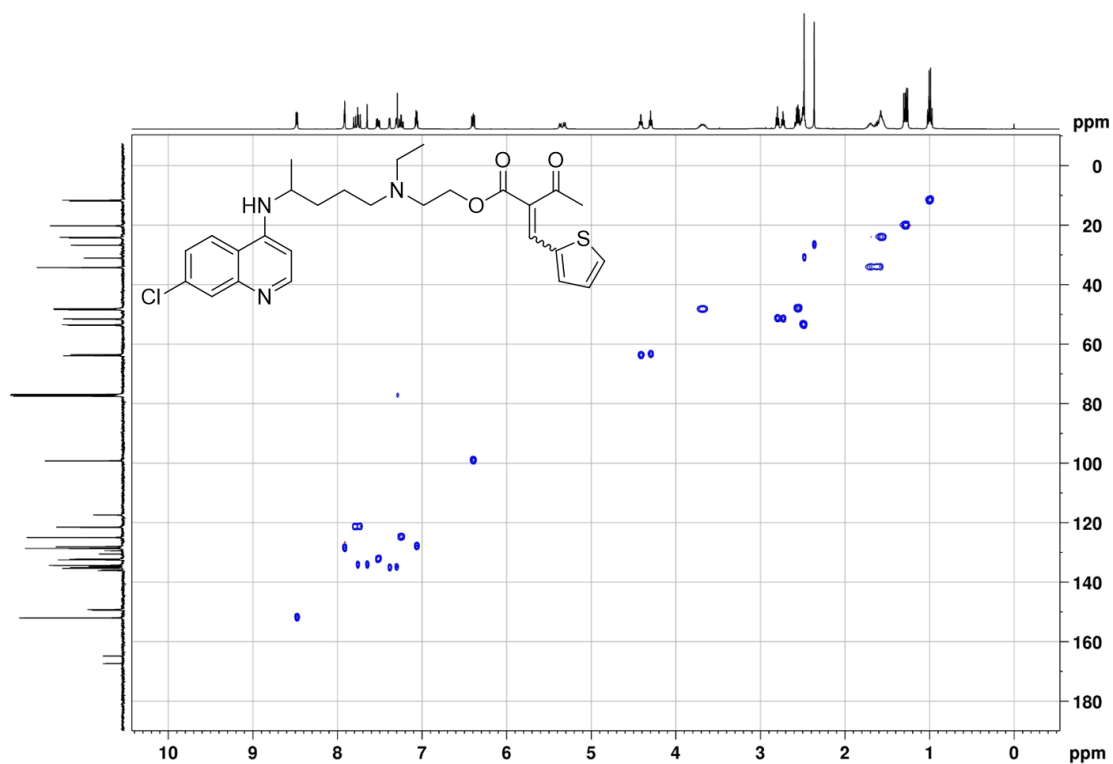

**Figure S65.** Heteronuclear correlation of a  $^1\text{H}$ - $^{13}\text{C}$  bond (HSQC) in  $\text{CDCl}_3$  of (*E/Z*)-**7o**.

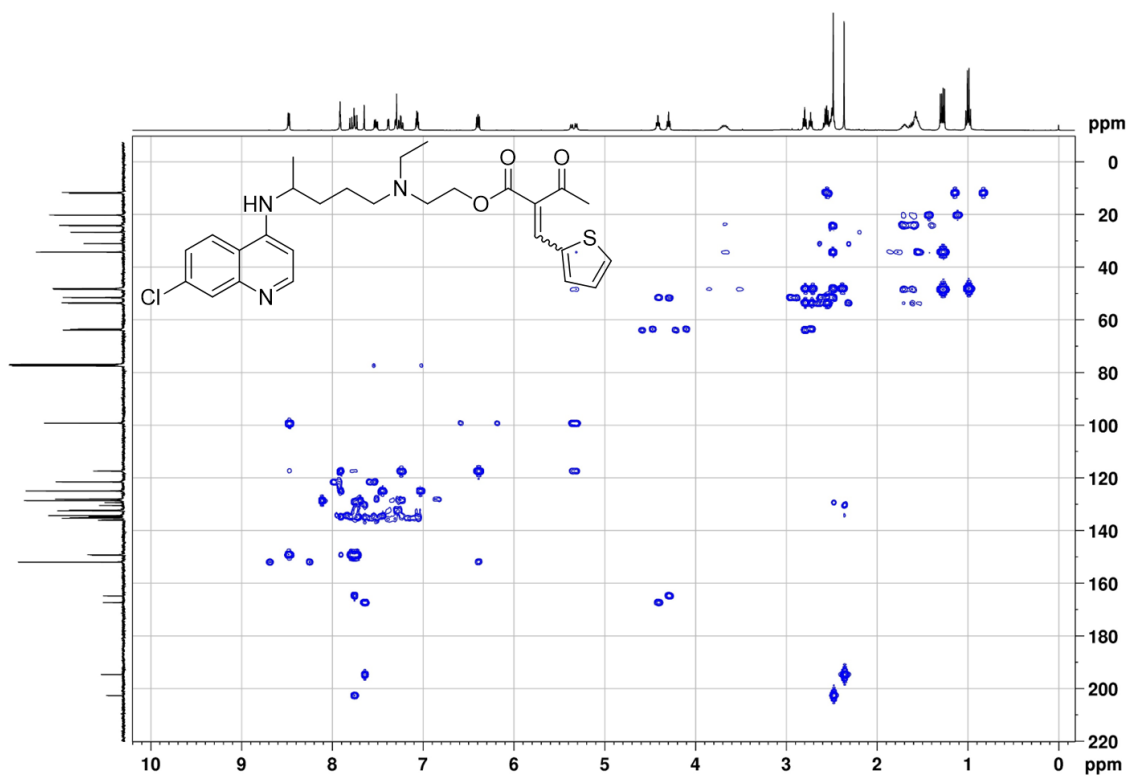

**Figure S66.** Heteronuclear correlation of a  $^1\text{H}$ - $^{13}\text{C}$  bond (HMBC) in  $\text{CDCl}_3$  of (*E/Z*)-**7o**.

## *d*sel-HSQMBC-IPAP Spectra

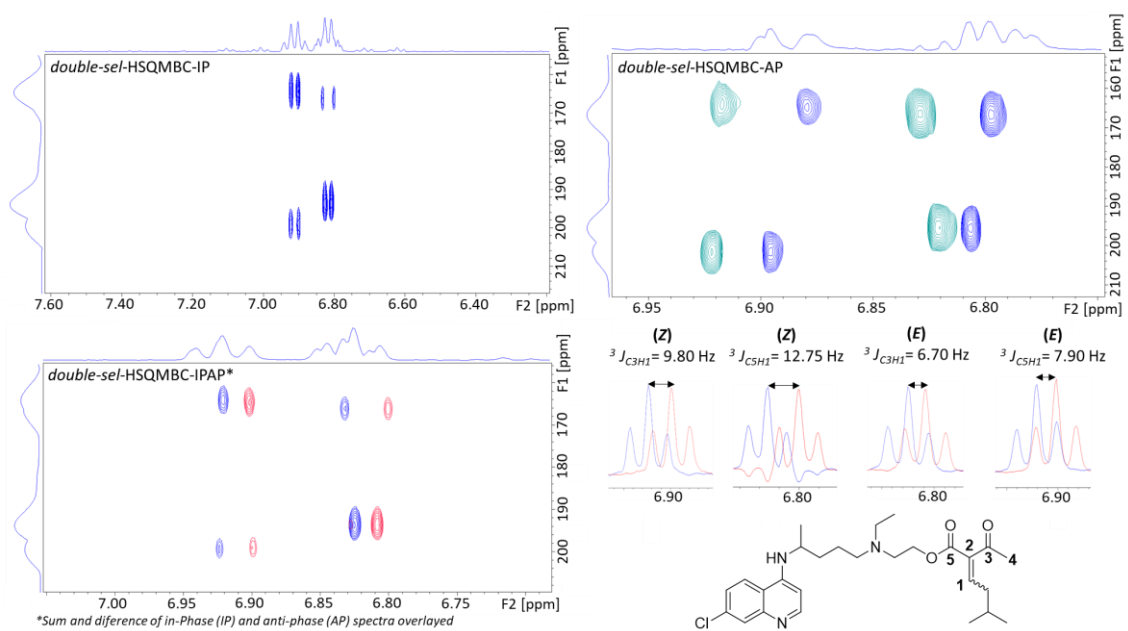

**Figure S67.** *d*sel-HSQMBC-IPAP spectra for the mixture of isomers (40:60, *E/Z*) from compound **7a**.

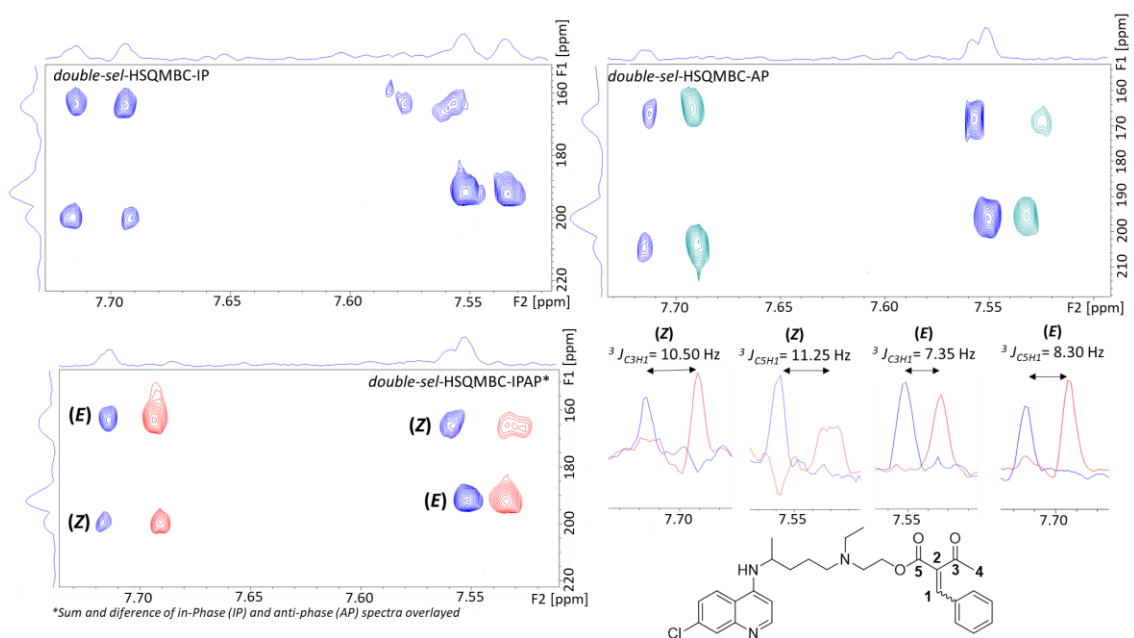

**Figure S68.** *d*sel-HSQMBC-IPAP spectra for the mixture of isomers (45:55, *E/Z*) from compound **7b**.

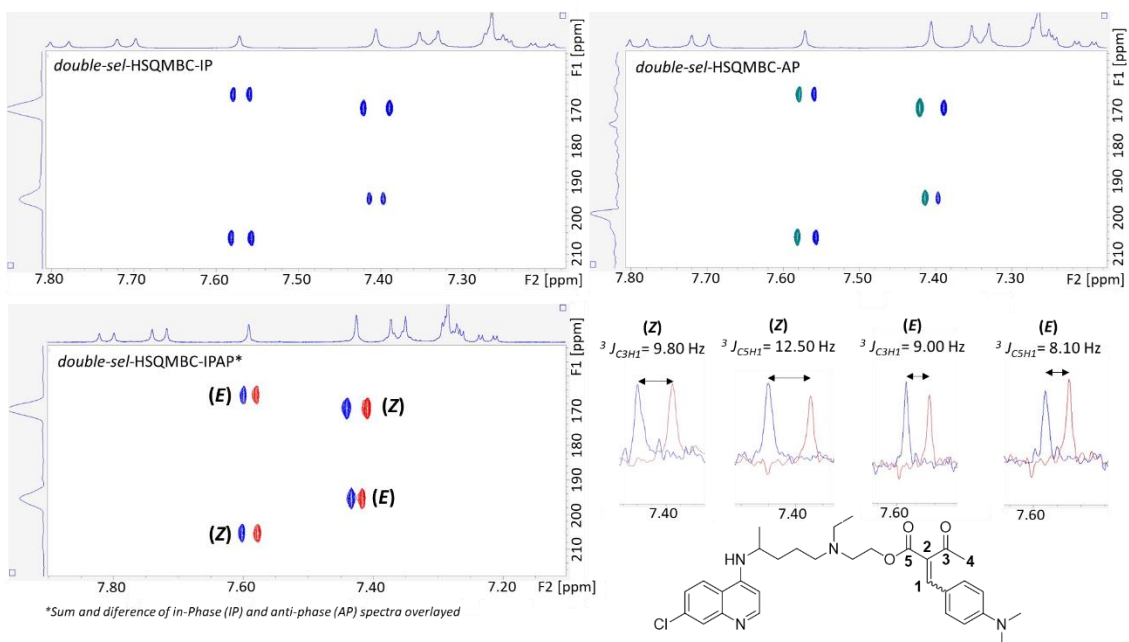

**Figure S69.** *dsel*-HSQMBC-IPAP spectra for the mixture of isomers (40:60, *E/Z*) from compound **7c**.

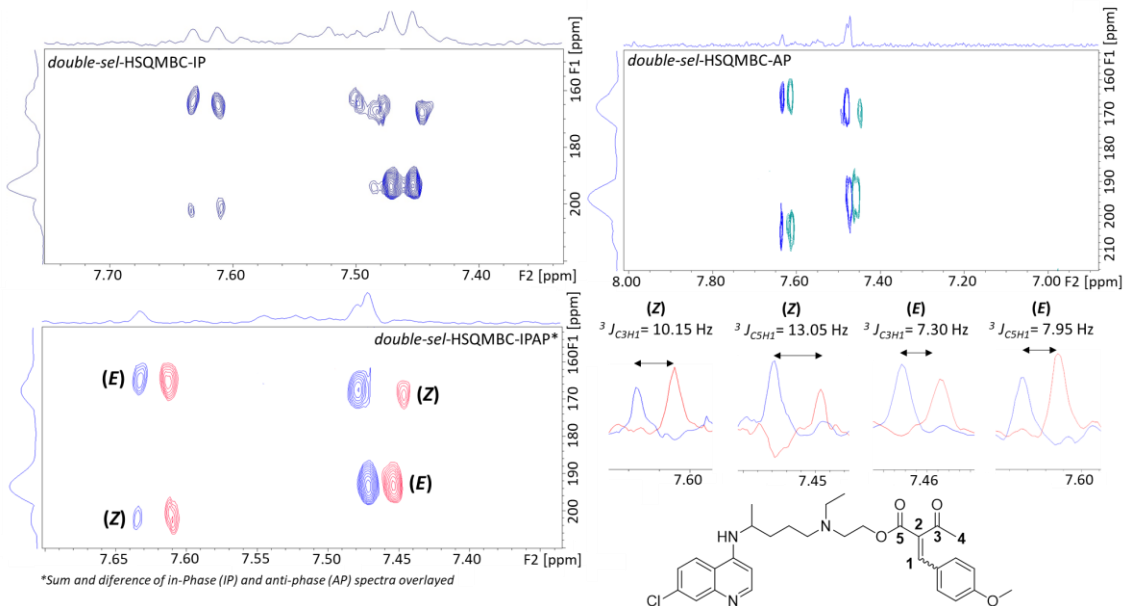

**Figure S70.** *dsel*-HSQMBC-IPAP spectra for the mixture of isomers (44:56, *E/Z*) from compound **7d**.

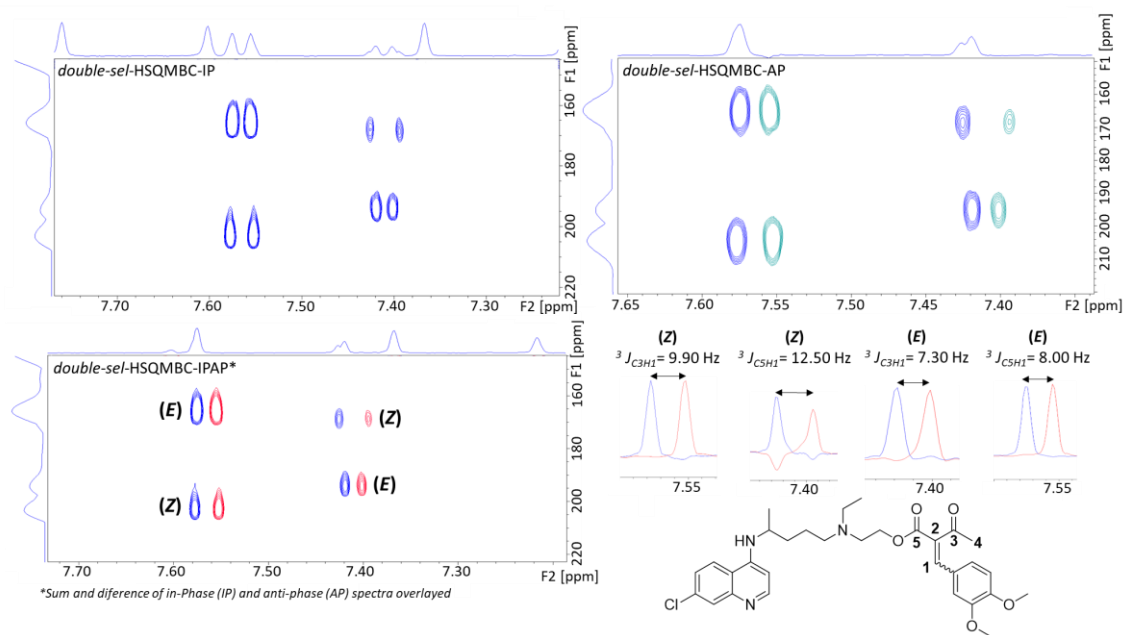

**Figure S71.** *dsel*-HSQMBC-IPAP spectra for the mixture of isomers (45:55, *E/Z*) from compound **7e**.

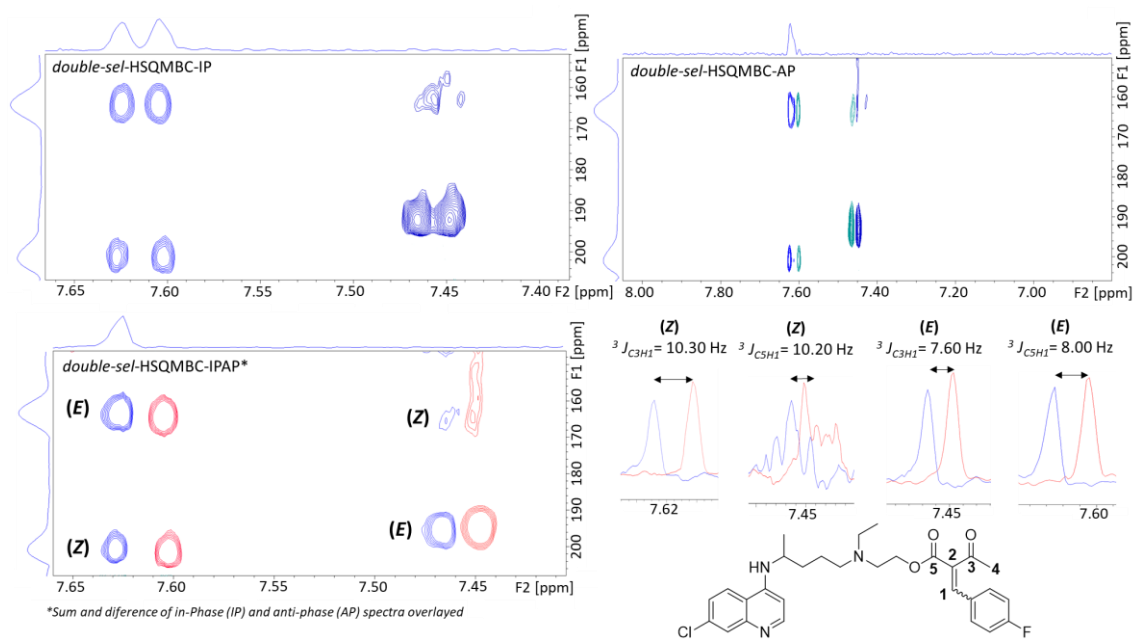

**Figure S72.** *dsel*-HSQMBC-IPAP spectra for the mixture of isomers (*E/Z* not determined due to overlap) from compound **7f**.

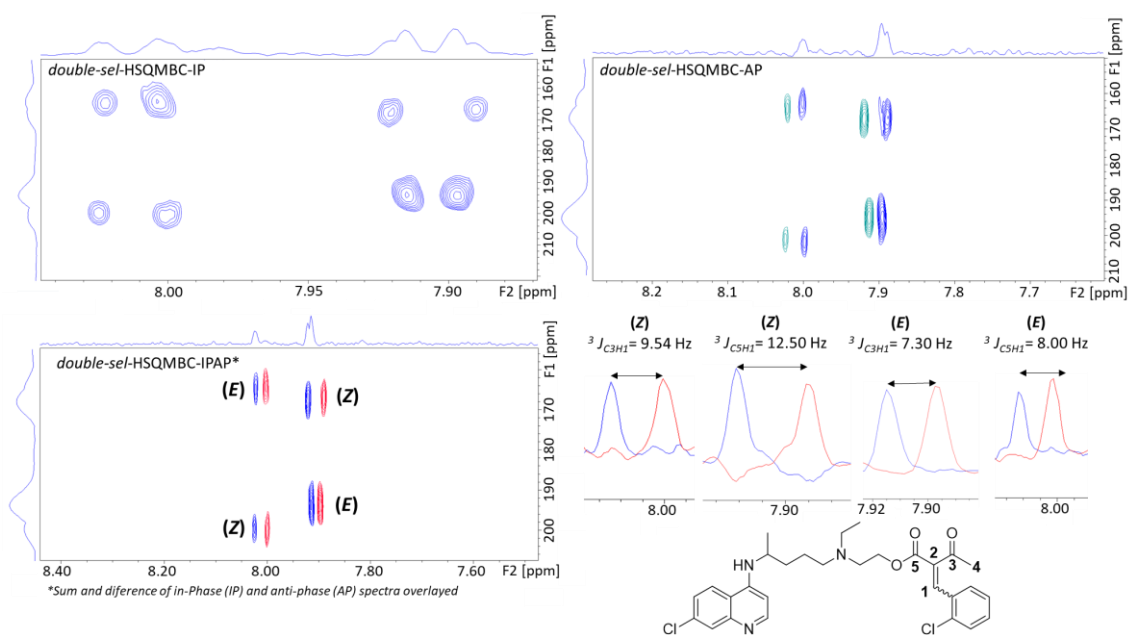

**Figure S73.** *dsel*-HSQMBC-IPAP spectra for the mixture of isomers (35:65, *E/Z*) from compound **7g**.

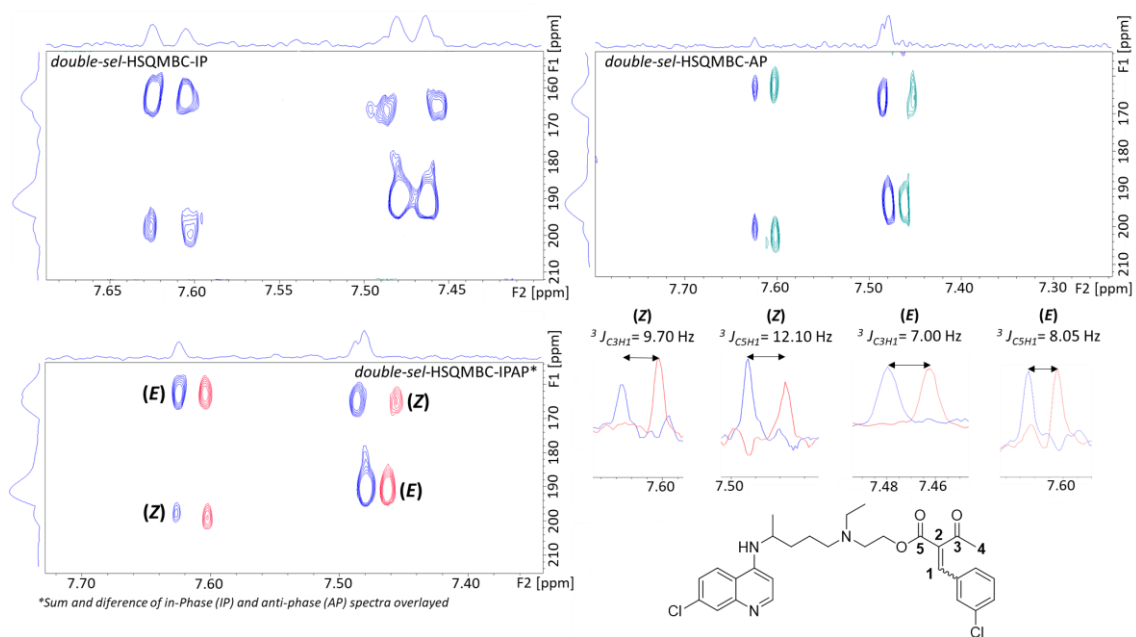

**Figure S74.** *dsel*-HSQMBC-IPAP spectra for the mixture of isomers (40:69, *E/Z*) from compound **7h**.

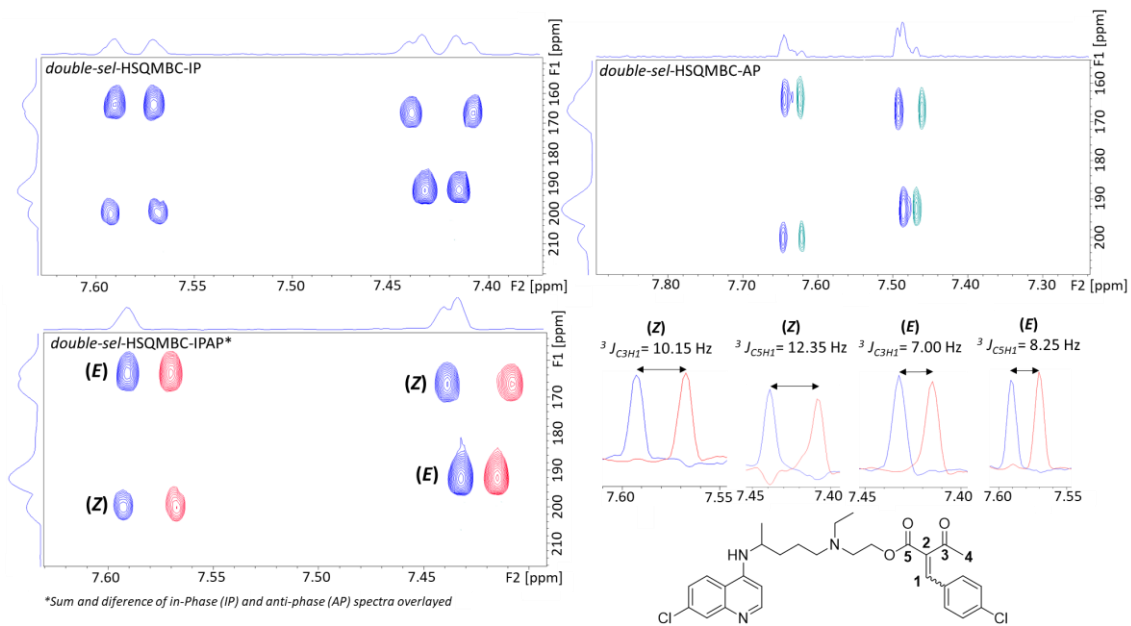

**Figure S75.** *dsel*-HSQMBC-IPAP spectra for the mixture of isomers (43:57, *E/Z*) from compound **7i**.

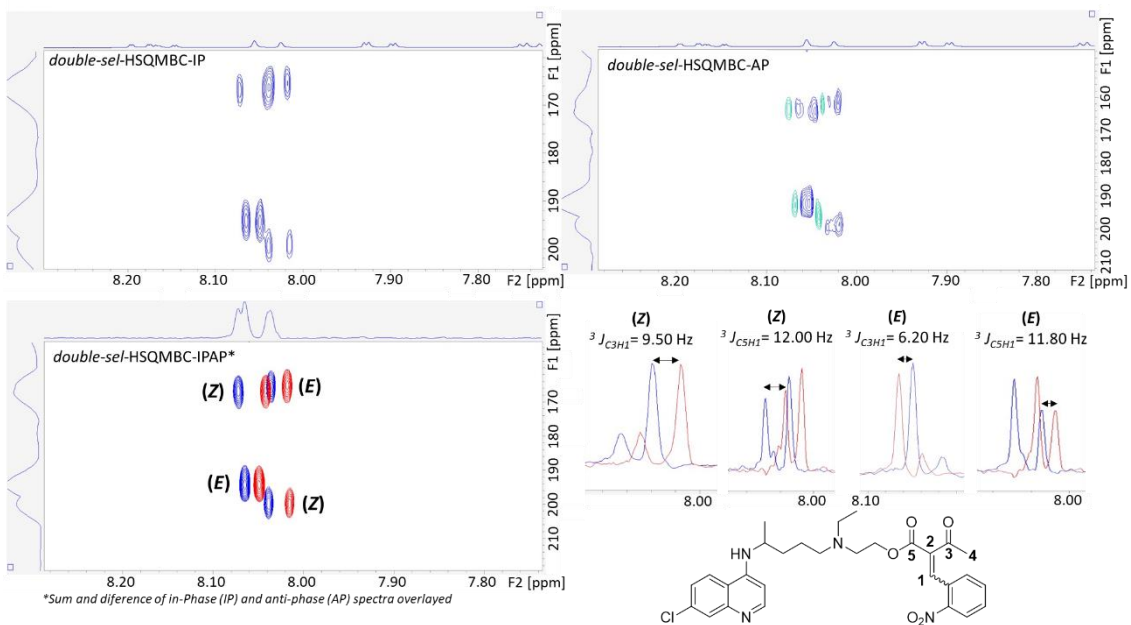

**Figure S76.** *dsel*-HSQMBC-IPAP spectra for the mixture of isomers (60:40, *E/Z*) from compound **7j**.



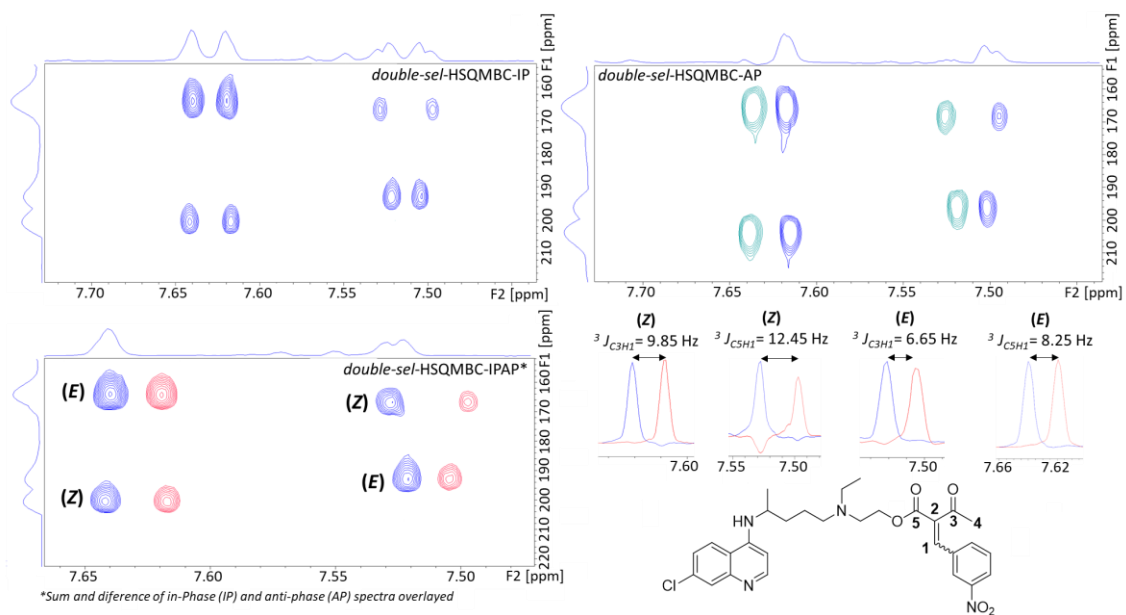

**Figure S77.** *dsel*-HSQMBC-IPAP spectra for the mixture of isomers (35:65, *E/Z*) from compound **7k**.

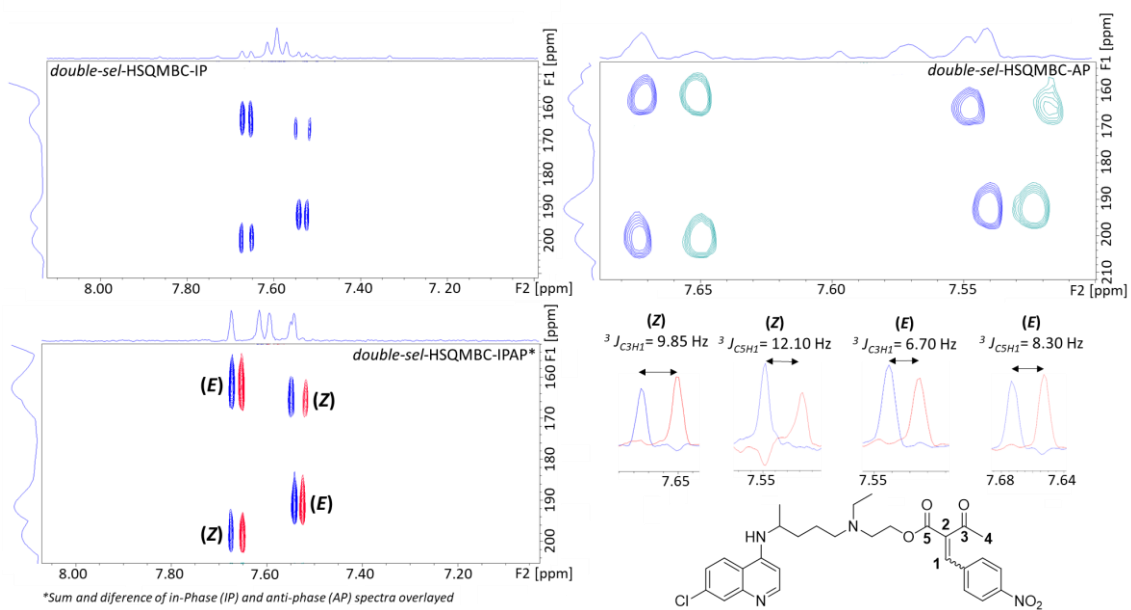

**Figure S78.** *dsel*-HSQMBC-IPAP spectra for the mixture of isomers (46:54, *E/Z*) from compound **7l**.

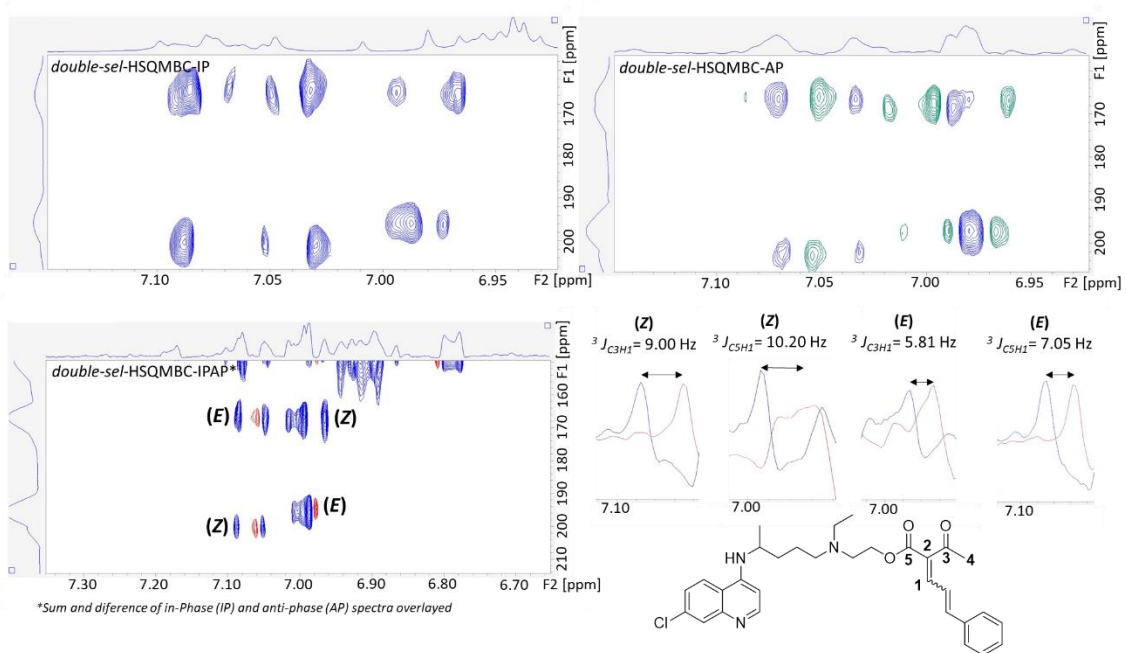

**Figure S79.** *dsel*-HSQMBC-IPAP spectra for the mixture of isomers (*E/Z* not determined due to overlap) from compound **7m**.

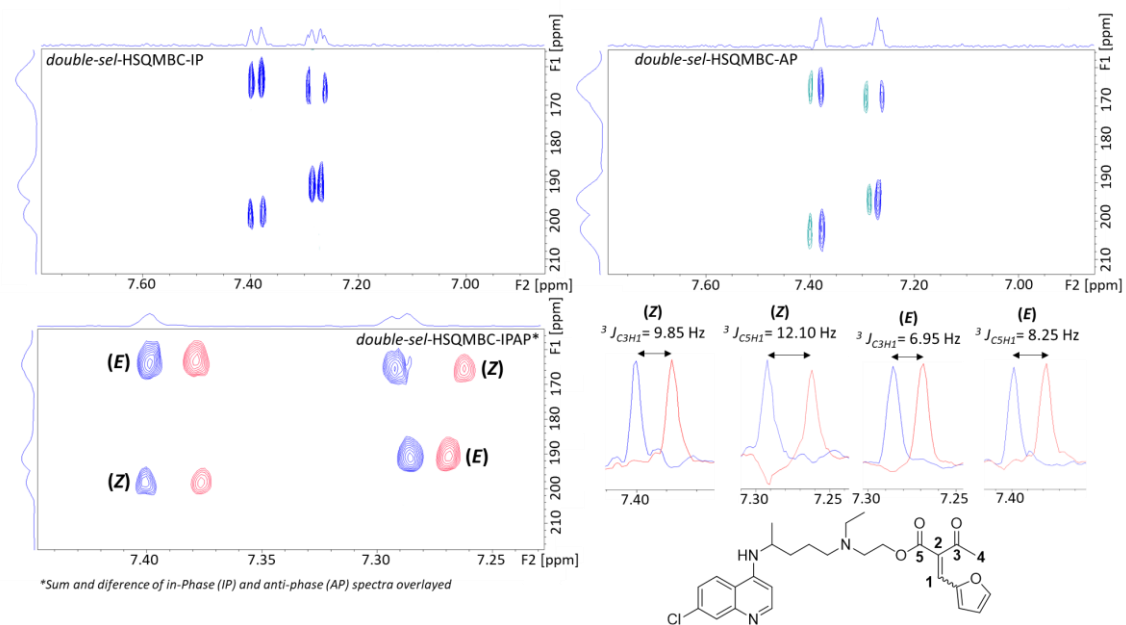

**Figure S80.** *dsel*-HSQMBC-IPAP spectra for the mixture of isomers (55:45, *E/Z*) from compound **7n**.

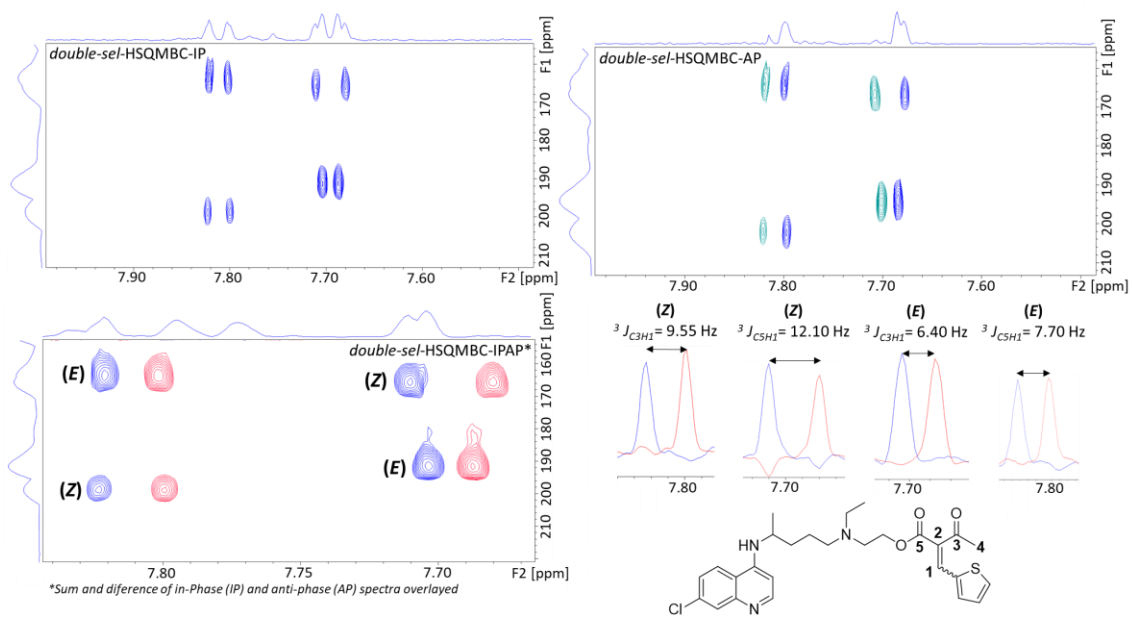

**Figure S81.** *dsel*-HSQMBC-IPAP spectra for the mixture of isomers (41:59, *E/Z*) from compound **7o**.

## High-Resolution Mass Spectrometry (HRMS) spectra

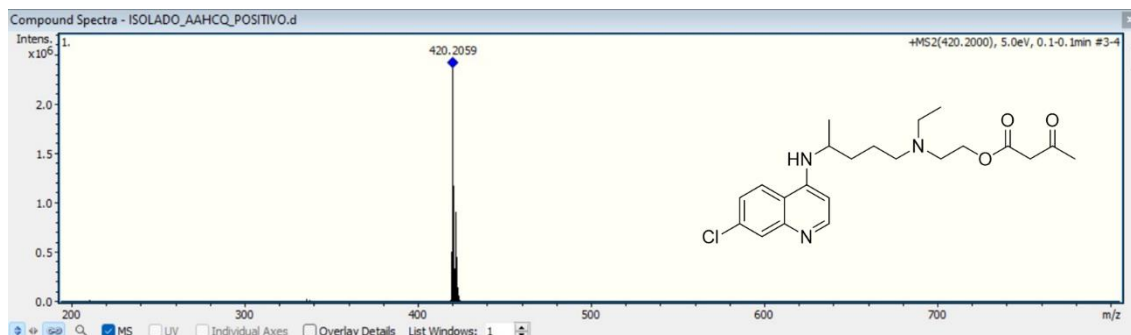

Figure S82. HRMS spectrum of **5**.

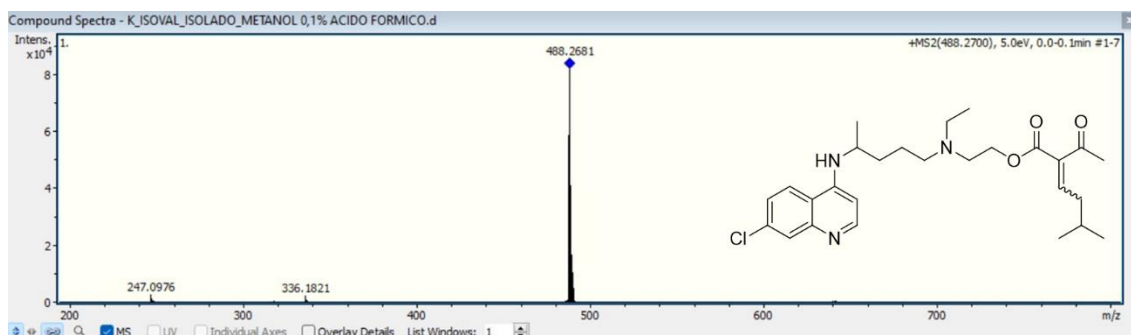

Figure S83. HRMS spectrum of (*E/Z*)-**7a**.

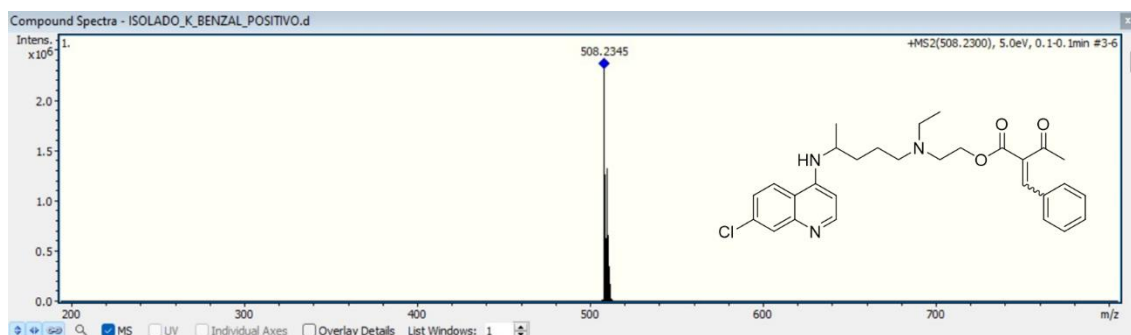

Figure S84. HRMS spectrum of (*E/Z*)-**7b**.

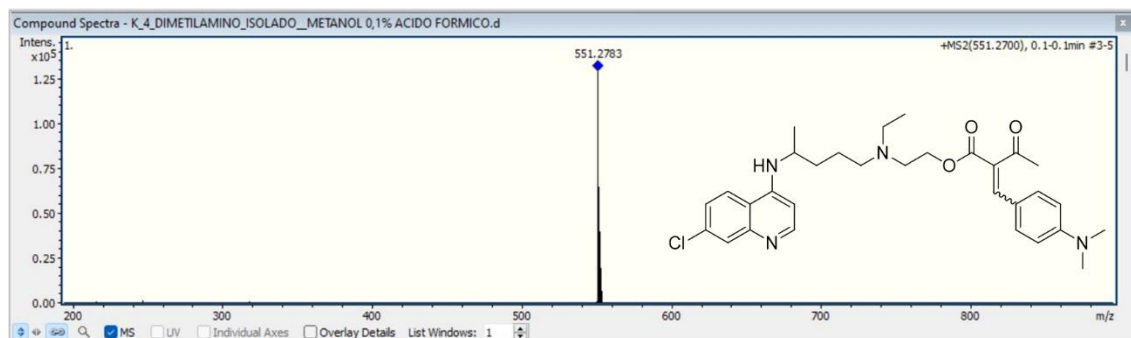

Figure S85. HRMS spectrum of (*E/Z*)-**7c**.

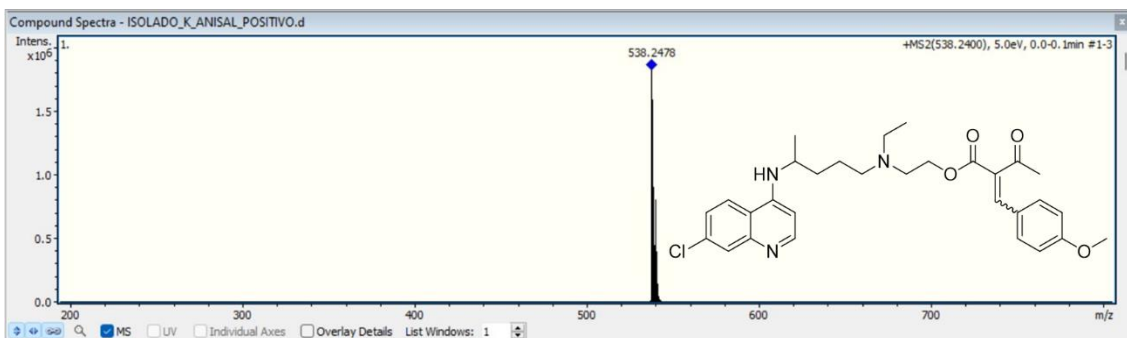

Figure S86. HRMS spectrum of (E/Z)-7d.

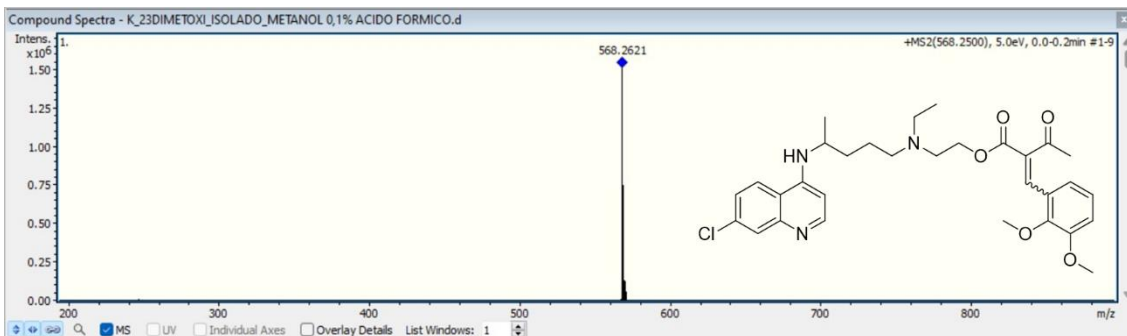

Figure S87. HRMS spectrum of (E/Z)-7e.

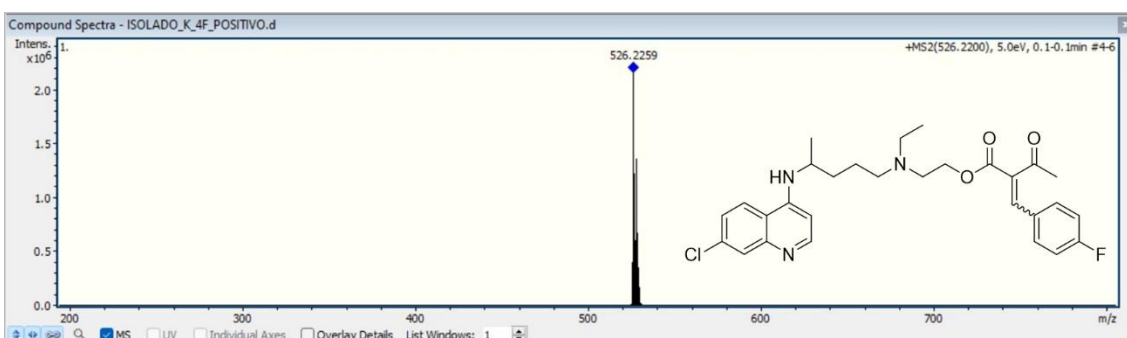

Figure S88. HRMS spectrum of (E/Z)-7f.

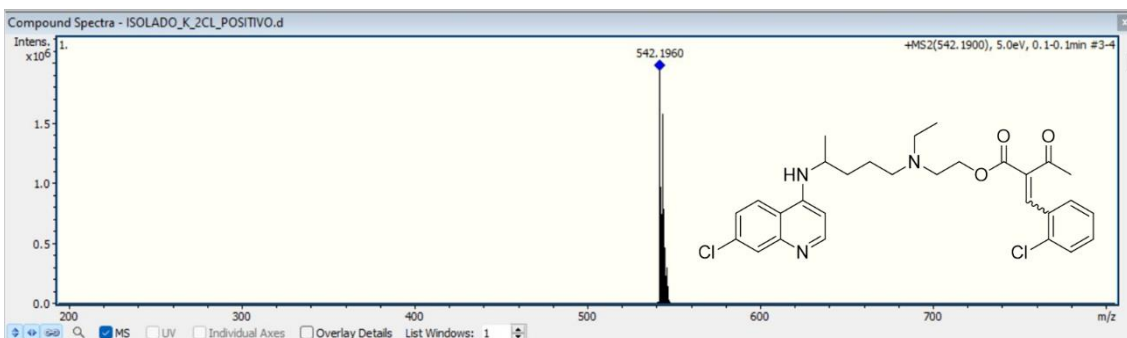

Figure S89. HRMS spectrum of (E/Z)-7g.

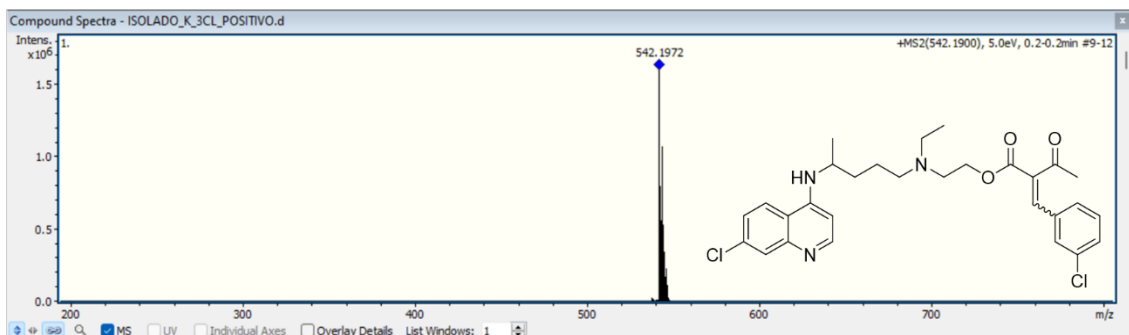

Figure S90. HRMS spectrum of (E/Z)-7h.

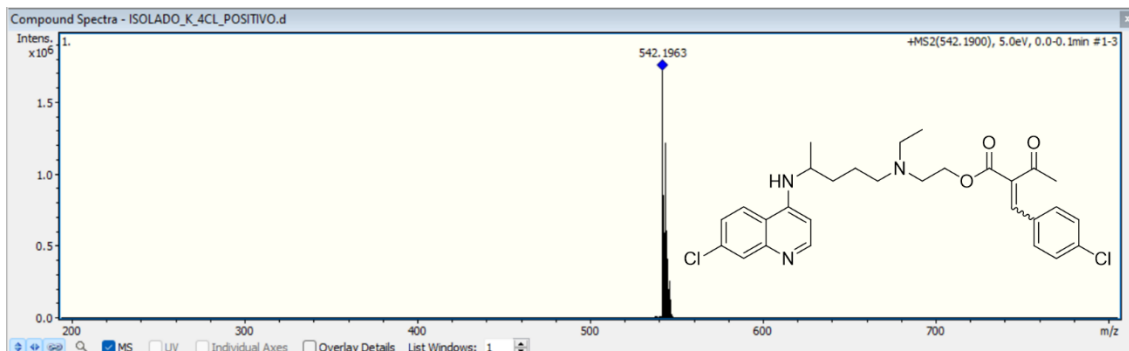

Figure S91. HRMS spectrum of (E/Z)-7i.

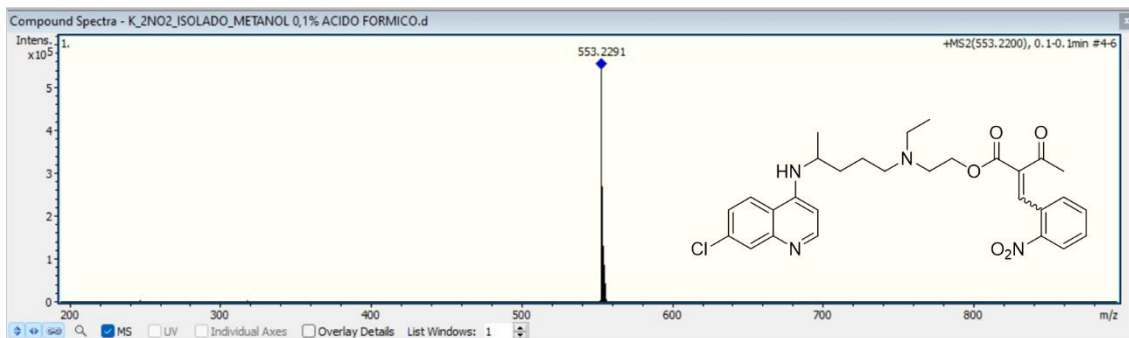

Figure S92. HRMS spectrum of (E/Z)-7j.

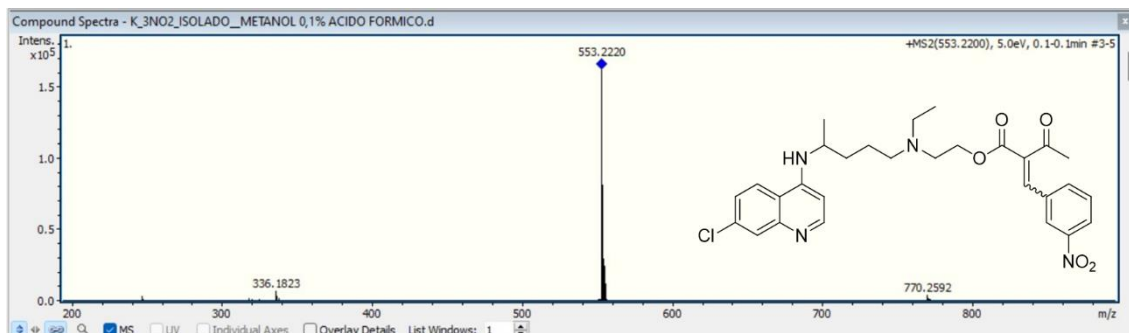

Figure S93. HRMS spectrum of (E/Z)-7k.

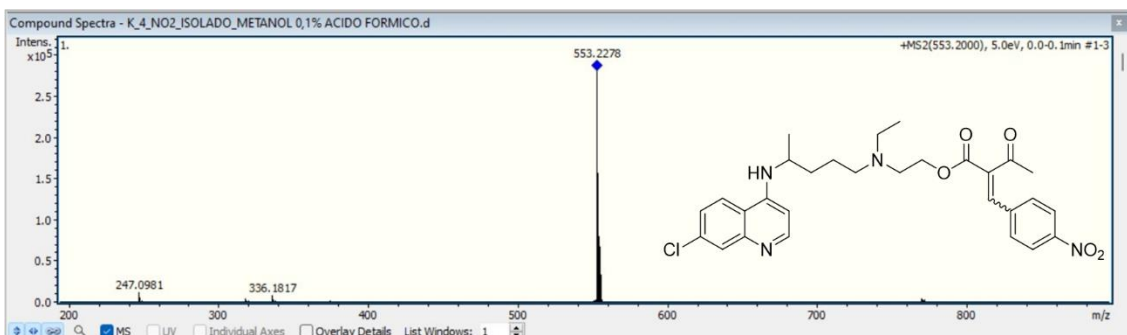

**Figure S94.** HRMS spectrum of (E/Z)-7l.

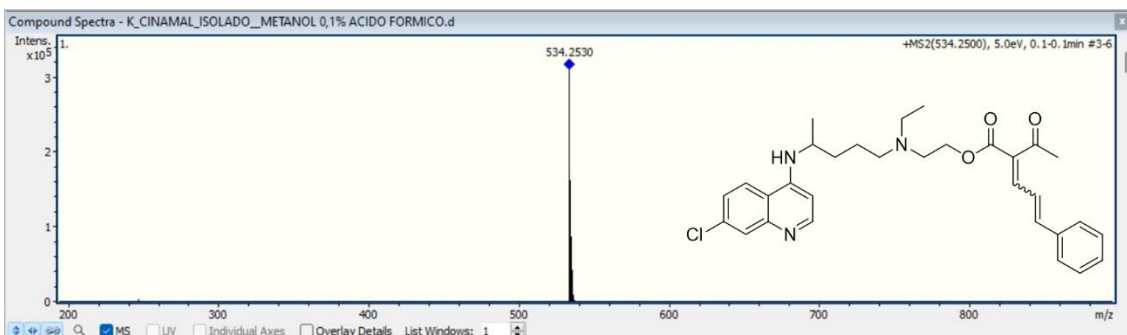

**Figure S95.** HRMS spectrum of (E/Z)-7m.

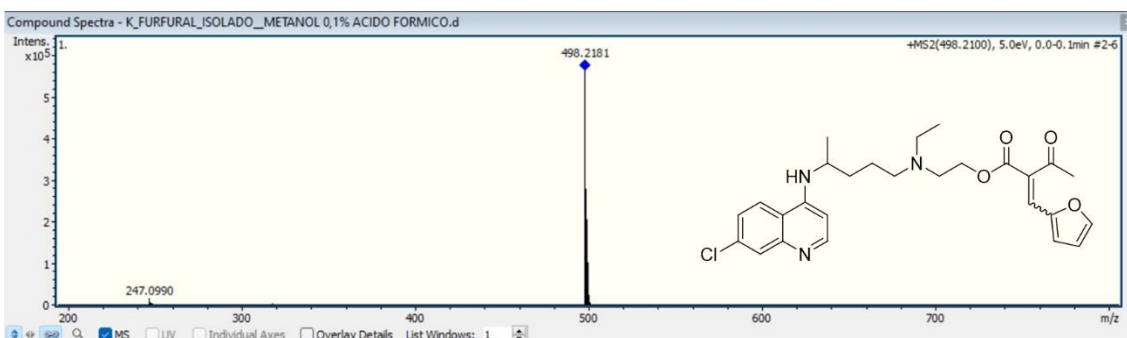

**Figure S96.** HRMS spectrum of (E/Z)-7n.

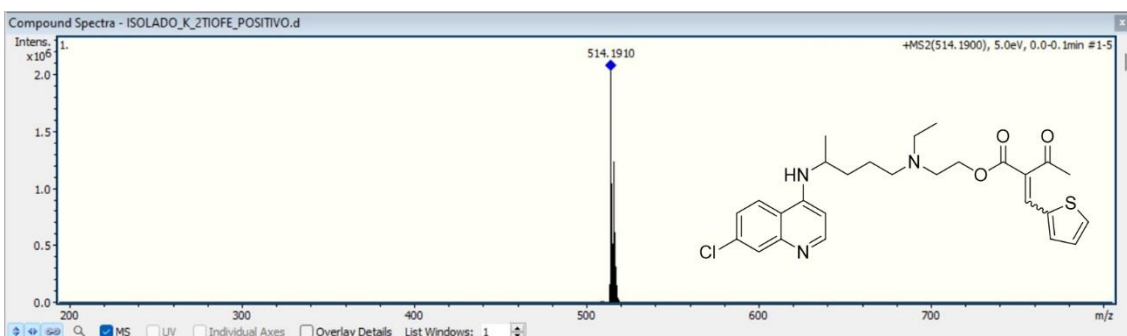

**Figure S97.** HRMS spectrum of (E/Z)-7o.

## Fourier Transform Infrared Spectroscopy (FT-IR) spectra

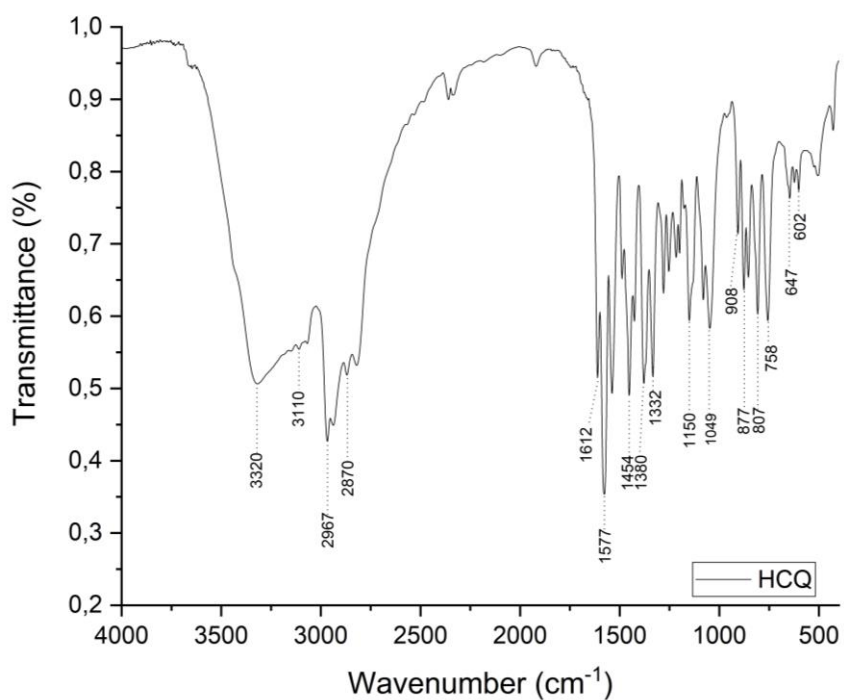

**Figure S98.** FT-IR spectrum of **4**.

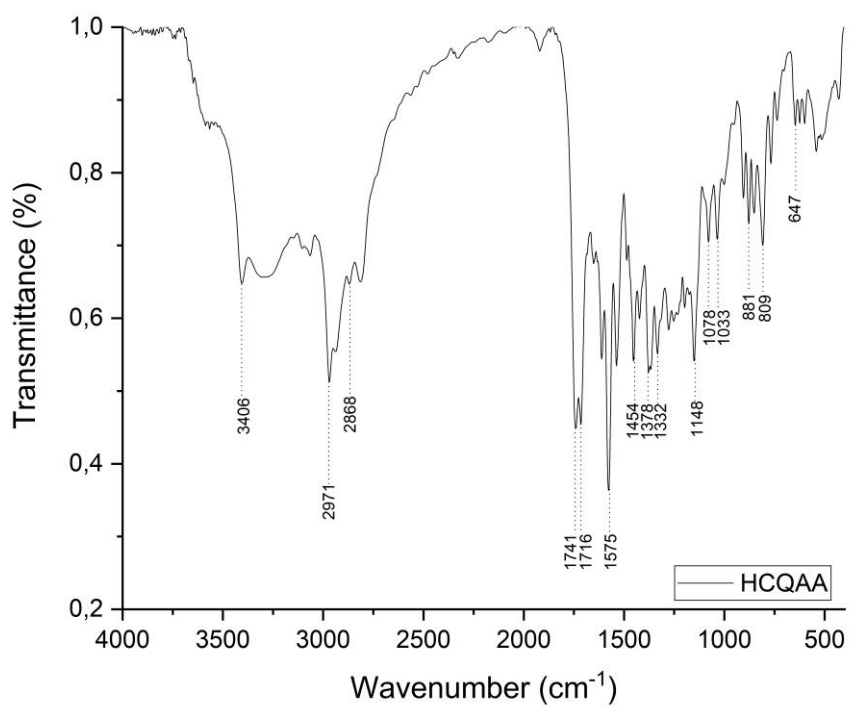

**Figure S99.** FT-IR spectrum of **5**.



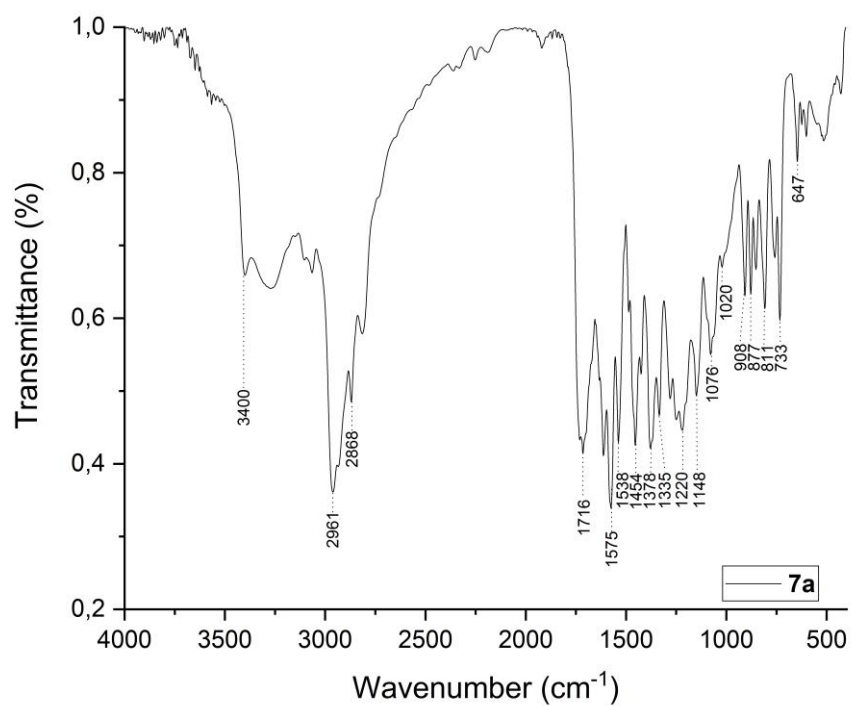

**Figure S100.** FT-IR spectrum of (E/Z)-7a.

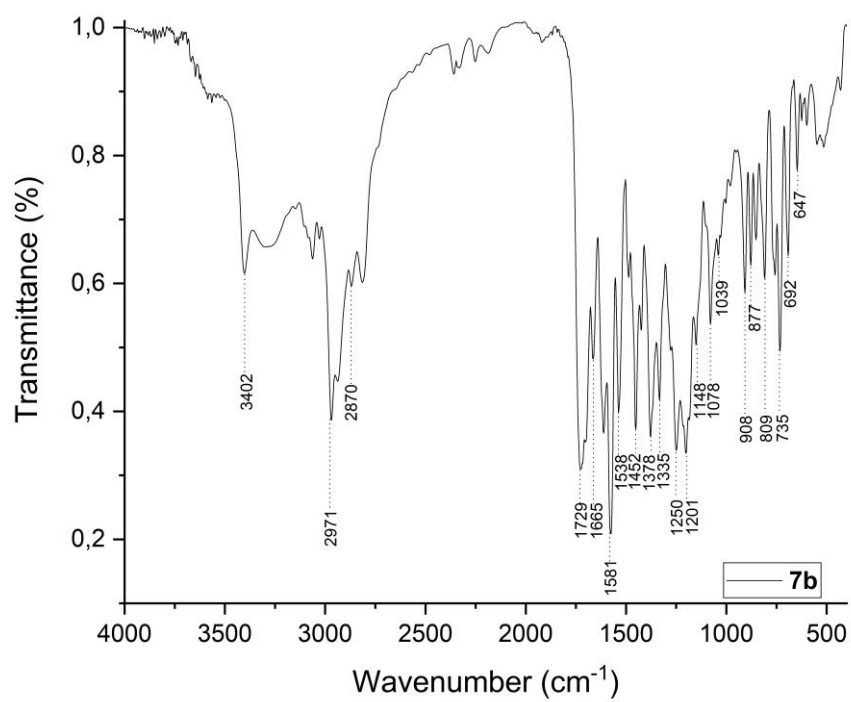

**Figure S101.** FT-IR spectrum of (E/Z)-7b.

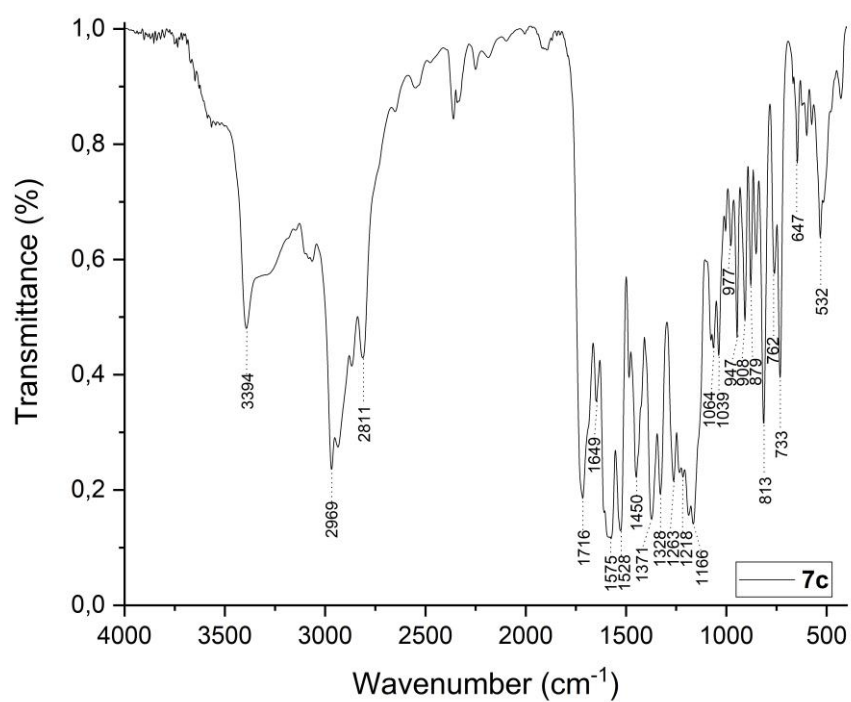

**Figure S102.** FT-IR spectrum of (*E/Z*)-**7c**.

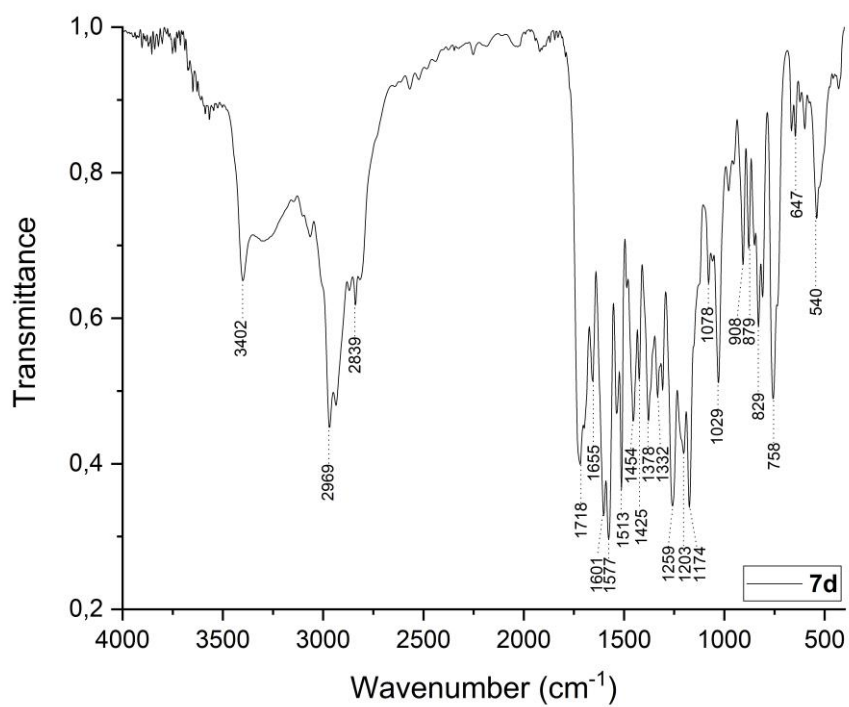

**Figure S103.** FT-IR spectrum of (*E/Z*)-**7d**.

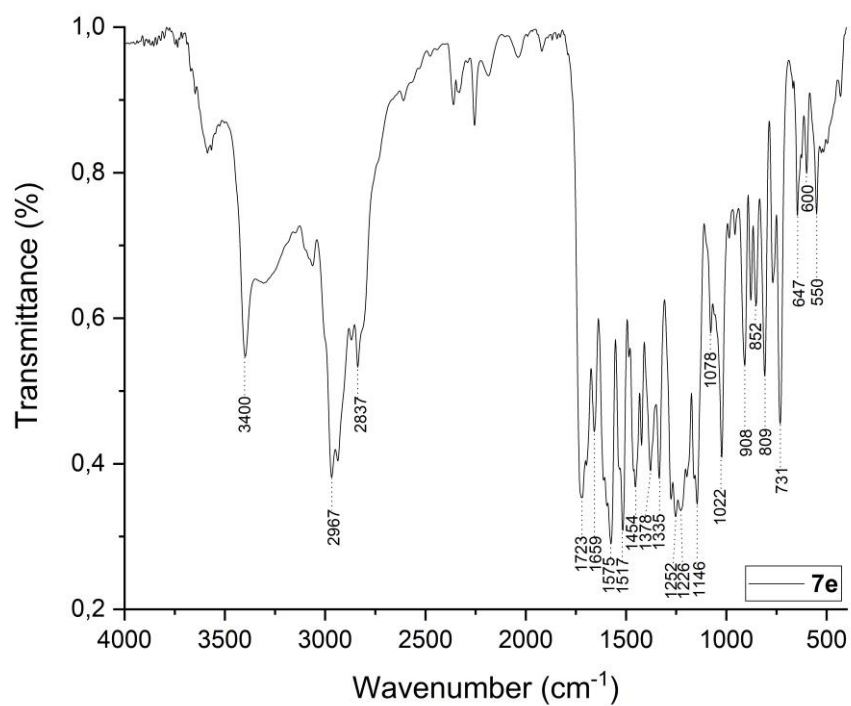

**Figure S104.** FT-IR spectrum of (*E/Z*)-**7e**.

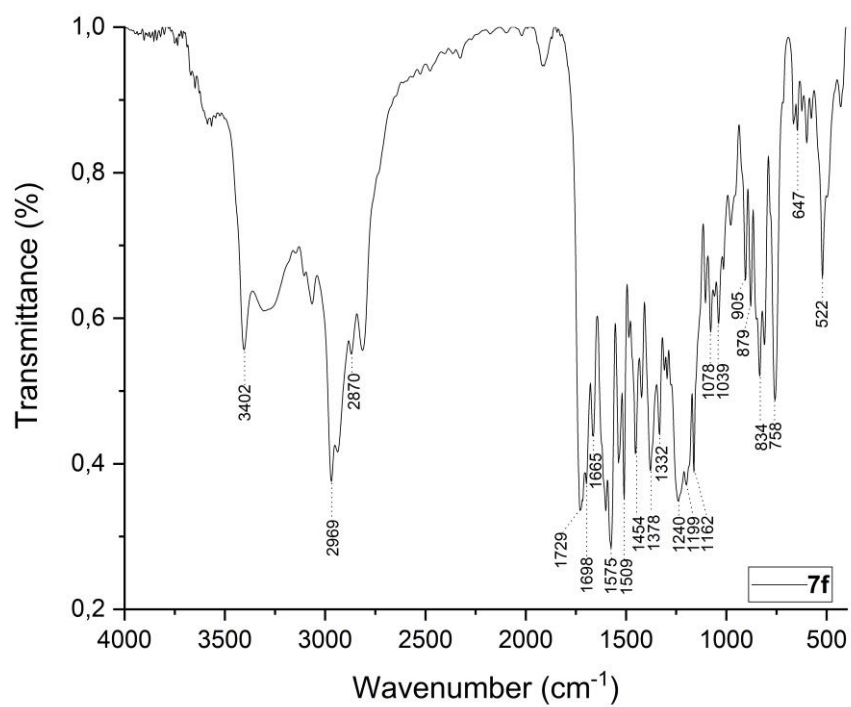

**Figure S105.** FT-IR spectrum of (*E/Z*)-**7f**.

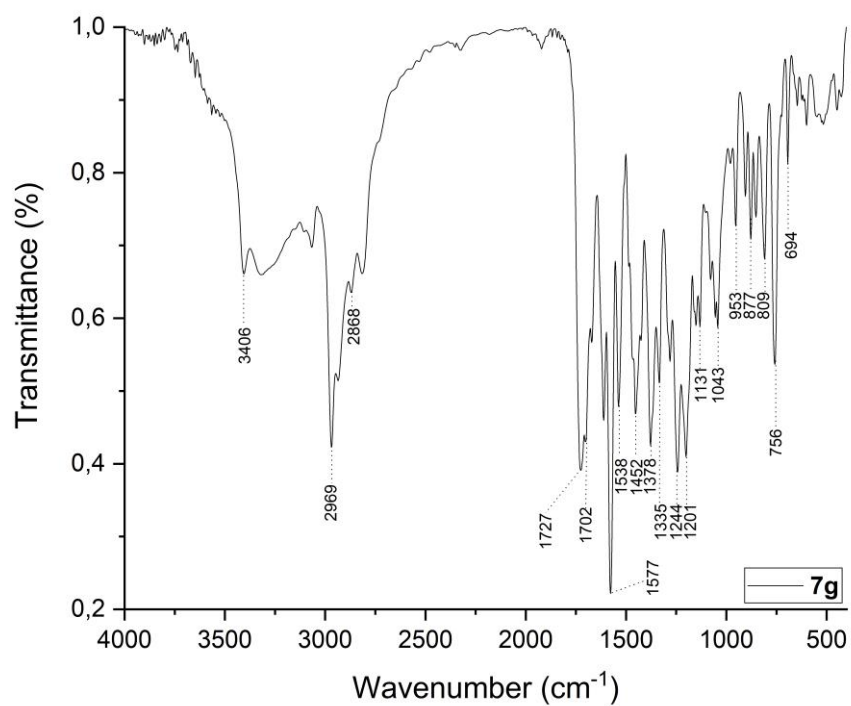

**Figure S106.** FT-IR spectrum of (E/Z)-7g.

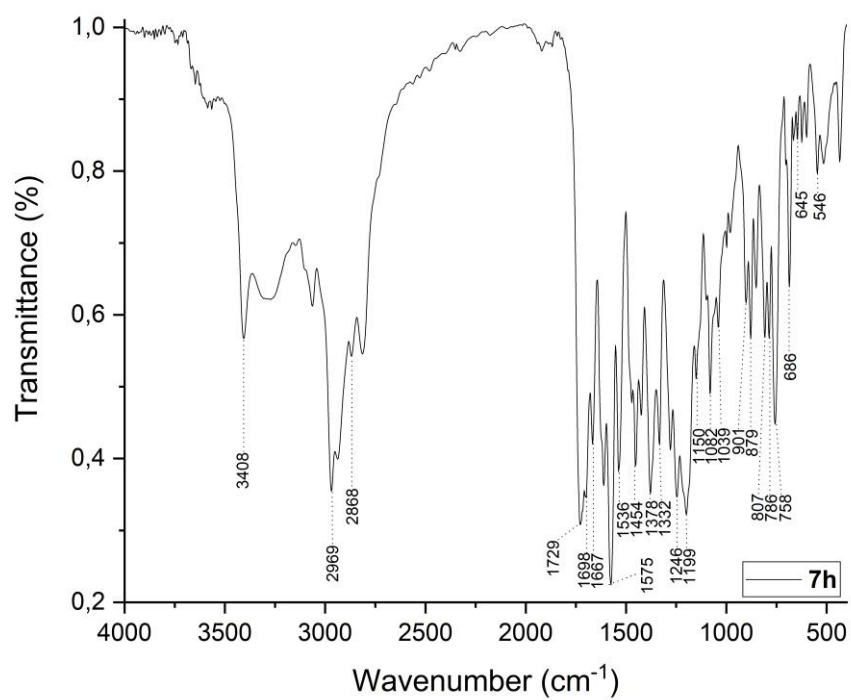

**Figure S107.** FT-IR spectrum of (E/Z)-7h.

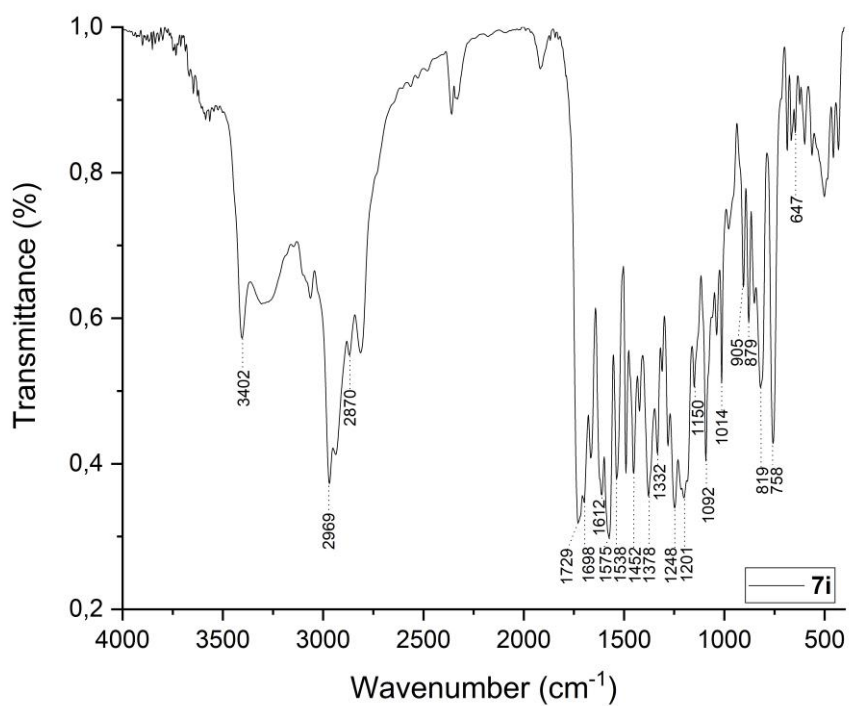

**Figure S108.** FT-IR spectrum of (*E/Z*)-**7i**.

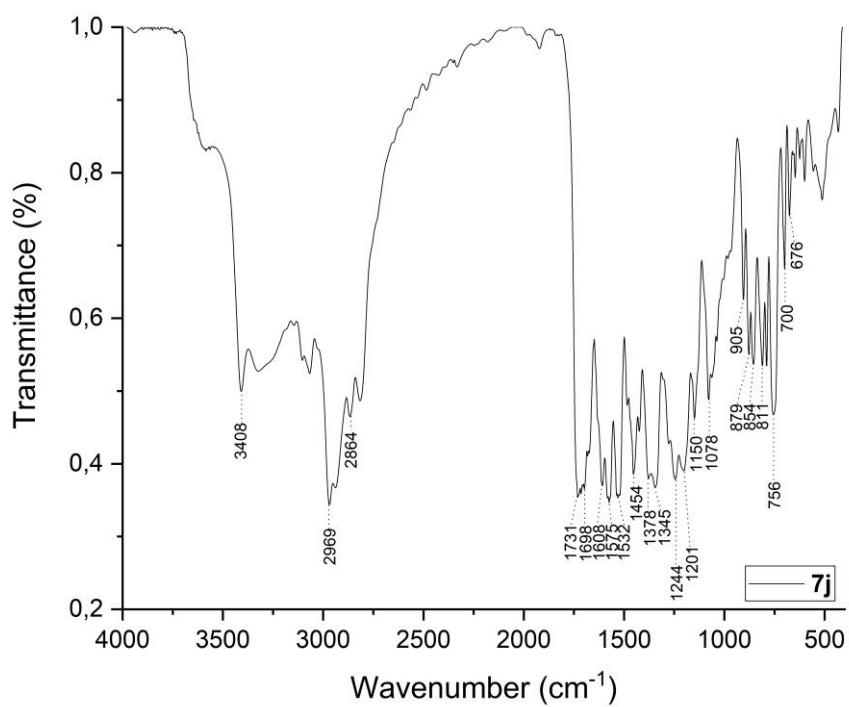

**Figure S109.** FT-IR spectrum of (*E/Z*)-**7j**.

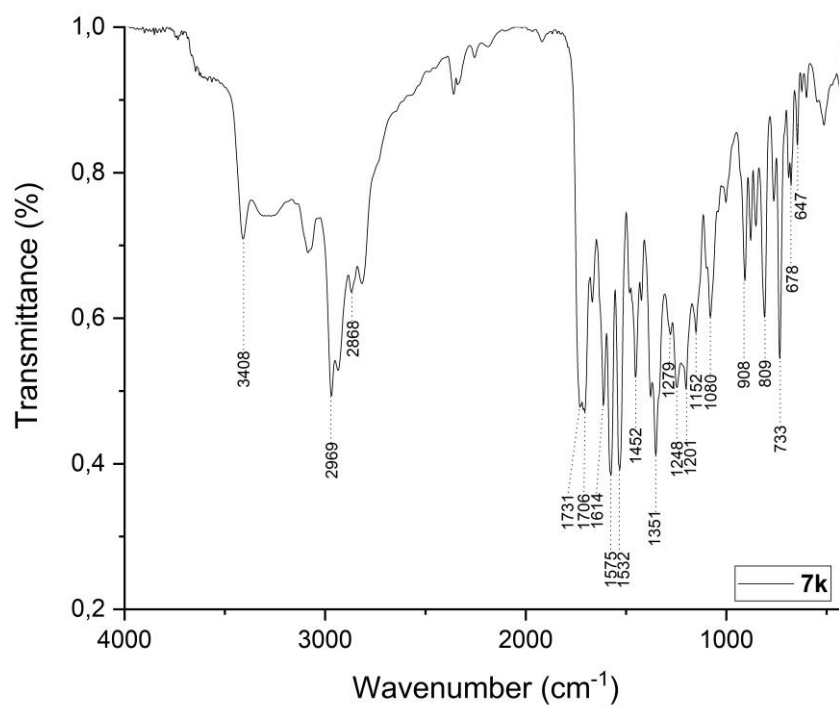

**Figure S110.** FT-IR spectrum of (*E/Z*)-**7k**.

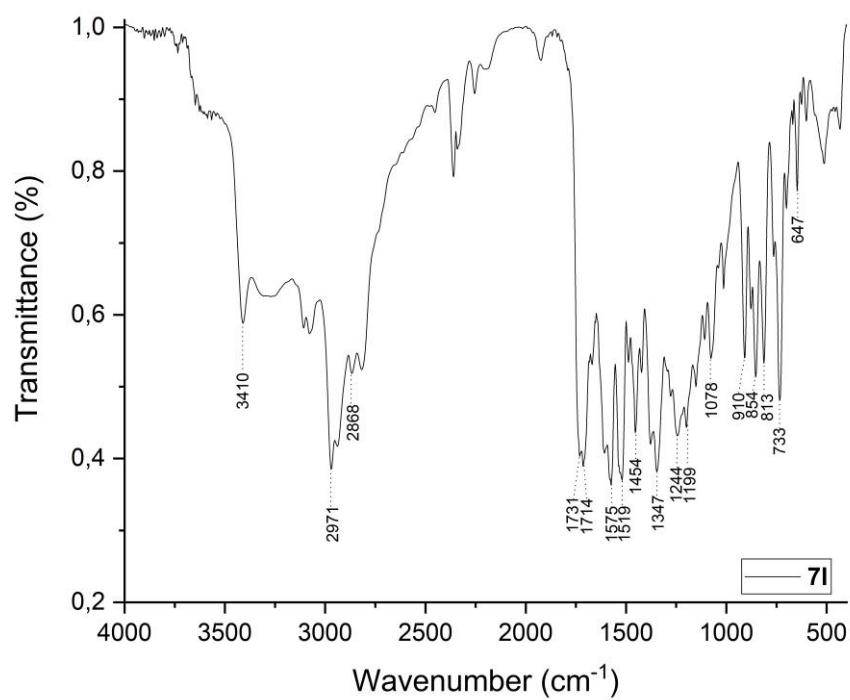

**Figure S111.** FT-IR spectrum of (*E/Z*)-**7l**.

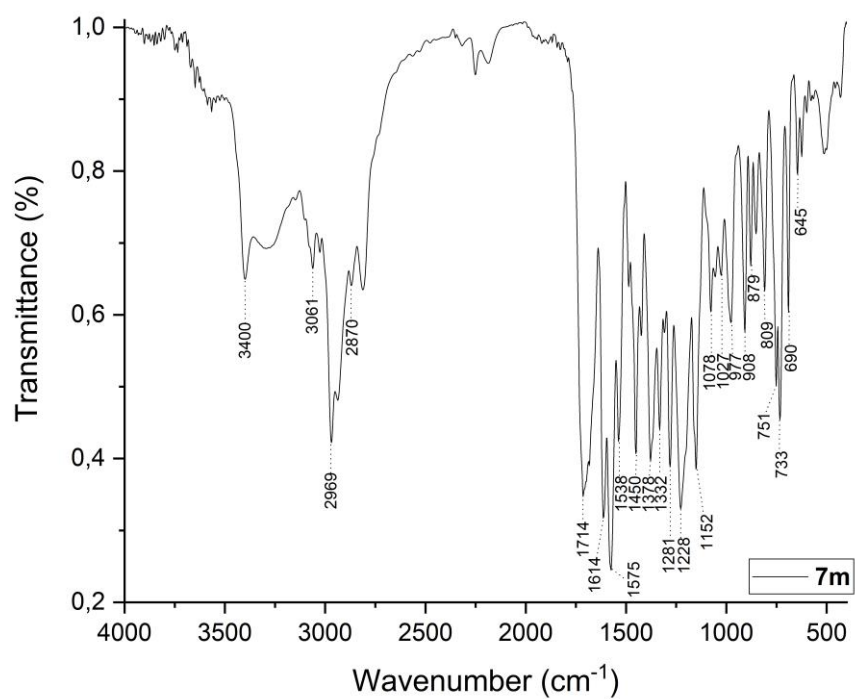

**Figure S112.** FT-IR spectrum of (*E/Z*)-**7m**.

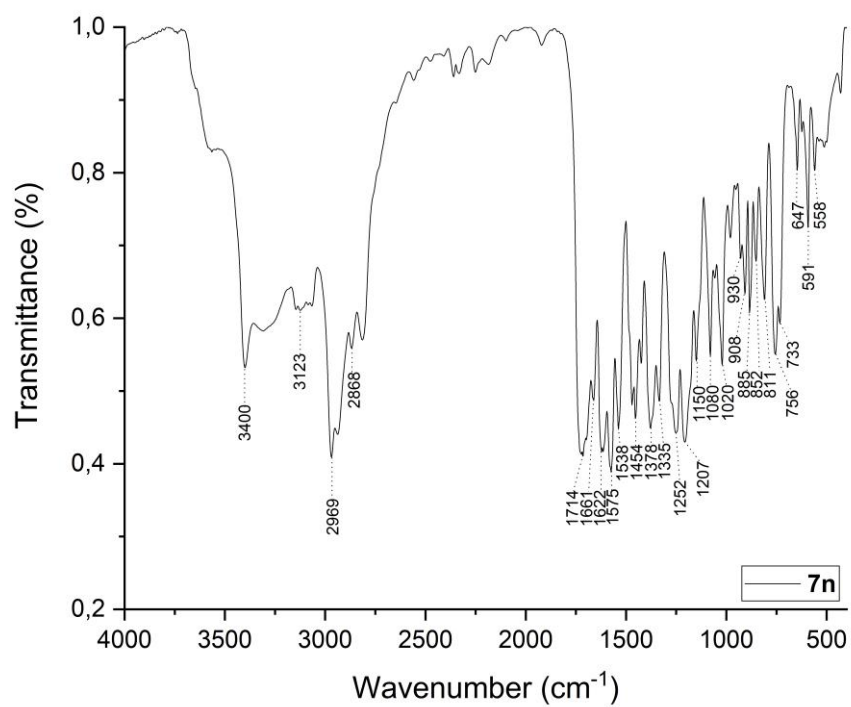

**Figure S113.** FT-IR spectrum of (*E/Z*)-**7n**.

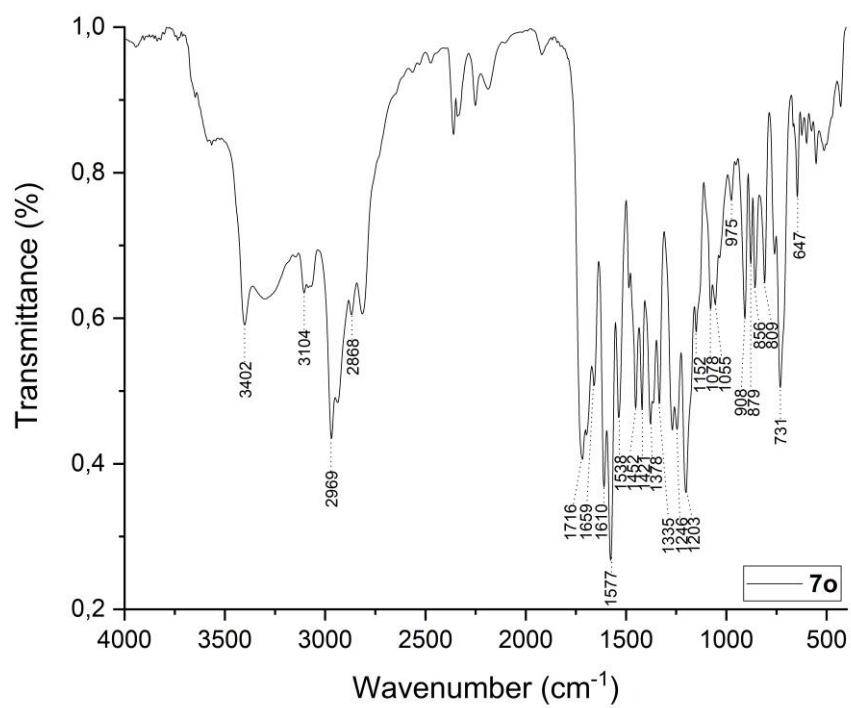

**Figure S114.** FT-IR spectrum of (E/Z)-7o.
